# Supplementary material for: One-pot multicomponent synthesis of thieno[2,3-b]indoles catalyzed by a magnetic nanoparticle-supported [Urea]4[ZnCl2] deep eutectic solvent
Source: Royal Society of Chemistry journal article supplement (doi:10.1039/d0ra00773k), 2020-01-01
Supplement: d0ra00773k1.pdf [file d0ra00773k1.pdf]

## Supporting Information

### One-pot multicomponent synthesis of thieno[2,3-*b*]indoles catalyzed by a magnetic nanoparticle-supported [Urea]<sub>4</sub>[ZnCl<sub>2</sub>] deep eutectic solvent.

The Thai Nguyen<sup>a,b</sup>, Phuong Hoang Tran<sup>a,b\*</sup>

<sup>a</sup> Department of Organic Chemistry, Faculty of Chemistry, University of Science, Ho Chi Minh City 721337, Vietnam.

<sup>b</sup> Vietnam National University, Ho Chi Minh City 721337, Vietnam.

\* E-mail: thphuong@hcmus.edu.vn

## Table of Contents

|            |                                                                                                                     |         |
|------------|---------------------------------------------------------------------------------------------------------------------|---------|
| Section S1 | Materials, equipments and analytical methods.....                                                                   | S2-S3   |
| Section S2 | Characterization of the catalyst.....                                                                               | S4-S9   |
| Section S3 | Optimization of the reaction conditions on the synthesis of 2-phenyl-8 <i>H</i> -thieno[2,3- <i>b</i> ]indole ..... | S9-S11  |
| Section S4 | The experiment for proposed mechanism.....                                                                          | S12     |
| Section S5 | Spectral data .....                                                                                                 | S13-S23 |
| Section S6 | Copies of <sup>1</sup> H , <sup>13</sup> C NMR and HRMS spectra of all products.....                                | S24-S55 |

## Section S1. Materials, equipment and analytical methods

### Materials

Sulfur (purity  $\geq$  99.5%), indole (purity  $\geq$  99%), 5-methylindole (purity  $\geq$  99%), 5-methoxyindole (purity  $\geq$  99%), 5-fluoroindole (purity  $\geq$  98%), 5-chloroindole (purity  $\geq$  98%), 5-bromoindole (purity  $\geq$  99%), 5-nitroindole (purity  $\geq$  99%), acetophenone (purity  $\geq$  98%), 4-methylacetophenone (purity  $\geq$  95%), 4-methoxyacetophenone (purity  $\geq$  98%), 4-fluoroacetophenone (purity  $\geq$  99%), 4-nitroacetophenone (purity  $\geq$  98%), 2-acetylthiophene (purity  $\geq$  98%), (3-chloropropyl)trimethoxysilane (purity  $\geq$  95%), choline chloride (purity  $\geq$  99%), urea (purity  $\geq$  98%), trifluoroacetic acid (purity  $\geq$  99%), aluminum chloride (anhydrous, purity  $\geq$  99%), zinc chloride (anhydrous, purity  $\geq$  97%), iron(III) chloride (anhydrous, purity  $\geq$  99%), tin(IV) chloride (anhydrous, purity  $\geq$  98%), copper(II) chloride (anhydrous, purity  $\geq$  98%), potassium hydroxide (purity  $>$  85%), were purchased from Sigma-Aldrich. Tetraethyl orthosilicate (purity  $>$  98%), acetic acid (purity  $>$  98%), phosphoric acid (purity  $\geq$  85%), sulfuric acid (purity  $\geq$  97.5%), and silica gel 230–400 mesh for flash chromatography, TLC plates (silica gel 60 F254), 1,4-dioxane (anhydrous, purity  $\geq$  99.9%), ethanol (anhydrous, purity  $\geq$  99%), acetonitrile (anhydrous, purity  $\geq$  99.8%), toluene (anhydrous, purity  $\geq$  99%), dichloromethane (anhydrous, 99%), *n*-butanol (anhydrous, purity  $\geq$  99.8%), *tert*-butanol (anhydrous, purity  $\geq$  99.5%), tetrahydrofuran (anhydrous, purity  $\geq$  99.5%), ethyl acetate (anhydrous, purity  $\geq$  99%), *N,N*-dimethylformamide (anhydrous, purity  $>$  99%), *p*-xylene (anhydrous, purity  $\geq$  99%) acetone and *n*-hexane (anhydrous, purity  $\geq$  99.5%) were obtained from Merck. Deuterated solvents, DMSO- $d_6$  and acetone- $d_6$ , were purchased from Cambridge Isotope Laboratories (Andover, MA). All chemicals were used without further purification.

### Equipment and analytical methods

The chemicals were measured on Ohaus 80251621 explorer precision balance. The reactions were conducted on an IKA C-MAG HS7 magnetic stirrer or Elma S30H Ultrasonic cleaning unit (ultrasonic frequency = 37 kHz). Analytical thin-layer chromatography (TLC) was performed on F-254 silica gel coated aluminum plates from Merck. Column chromatography was performed on silica gel 60, 0.04–0.06 mm (230–400 mesh). Melting points were recorded with a Buchi B-545 melting point Apparatus and are uncorrected.

Powder X-ray diffraction (PXRD) patterns were recorded using a D8 Advance diffractometer equipped with a LYNXEYE detector (Bragg-Brentano geometry,  $\text{CuK}_\alpha$  radiation  $\lambda = 1.54056 \text{ \AA}$ ). Thermal gravimetric analysis (TGA) was performed using a TA

instruments Q-500 thermal gravimetric analyzer under airflow with temperature ramp of 5 °C.min<sup>-1</sup>. Fourier transform infrared (FT-IR) spectra were measured on a Bruker E400 FT-IR spectrometer using potassium bromide pellets. Scanning electron microscope (SEM) images were taken on a Hitachi S-4800 scanning electron microscope operating at an accelerating voltage of 1 kV. Transmission electron microscope (TEM) images were taken on a Jem-Arm 300F grand atomic resolution electron microscope accelerating voltage of 300 kV. Energy-dispersive X-ray spectroscopy (EDX) analysis was performed using an EMAX energy EX-400 EDX device. Vibrating sample magnetometer (VSM) analysis was recorded on Model 10 Mark II VSM. Nuclear magnetic resonance (<sup>1</sup>H and <sup>13</sup>C NMR) spectra were acquired on a Bruker advance II 500 MHz NMR spectrometer. Chemical shifts were quoted in parts per million (ppm) and referenced to the appropriate solvent peak. High-resolution mass spectrometry (HRMS) was conducted in negative ionization mode on an Agilent 1200 series high-performance liquid chromatography coupled to a Bruker micrOTOF-QII EIS mass spectrometer detector. Gas chromatography-mass spectrometry (GC-MS) measurements were carried out on an Agilent GC System 7890 equipped with a mass selective detector (Agilent 5973N) and a capillary DB-5MS column (30 m × 250 μm × 0.25 μm). Inductively coupled plasma mass spectroscopy (ICP-MS) data were recorded on a PerkinElmer 350X. Raman spectra were recorded on a Horiba Xplora One using a 532 nm argon ion laser.

## Section S2. Characterization of the catalyst

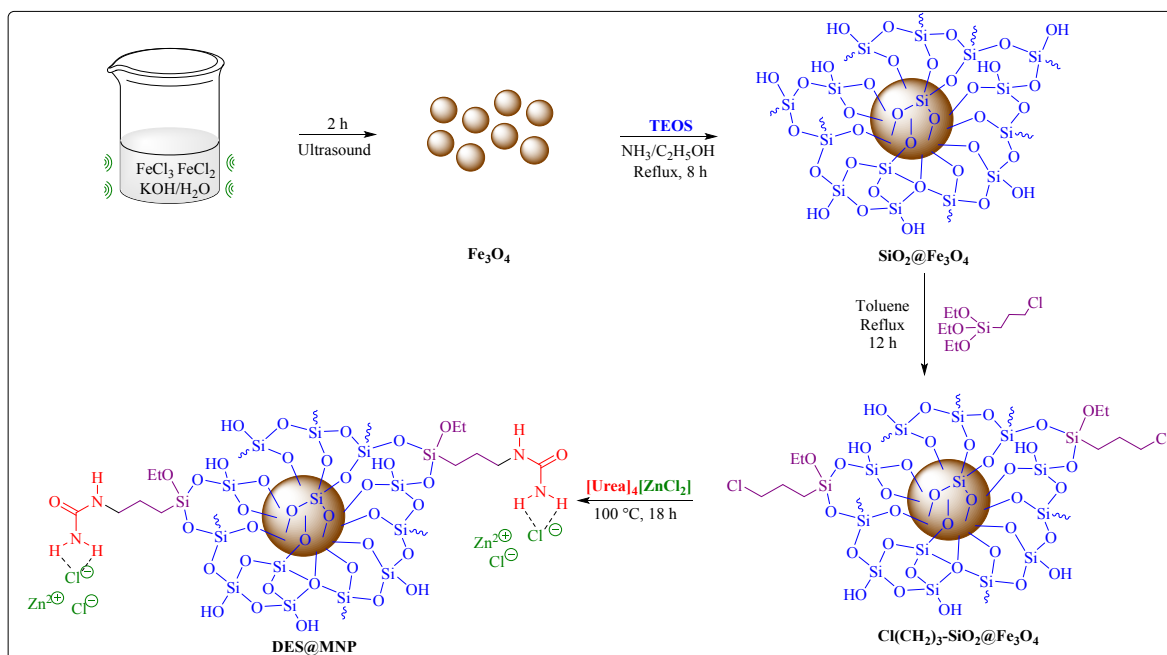

**Scheme S1. The preparation of DES@MNP catalyst**

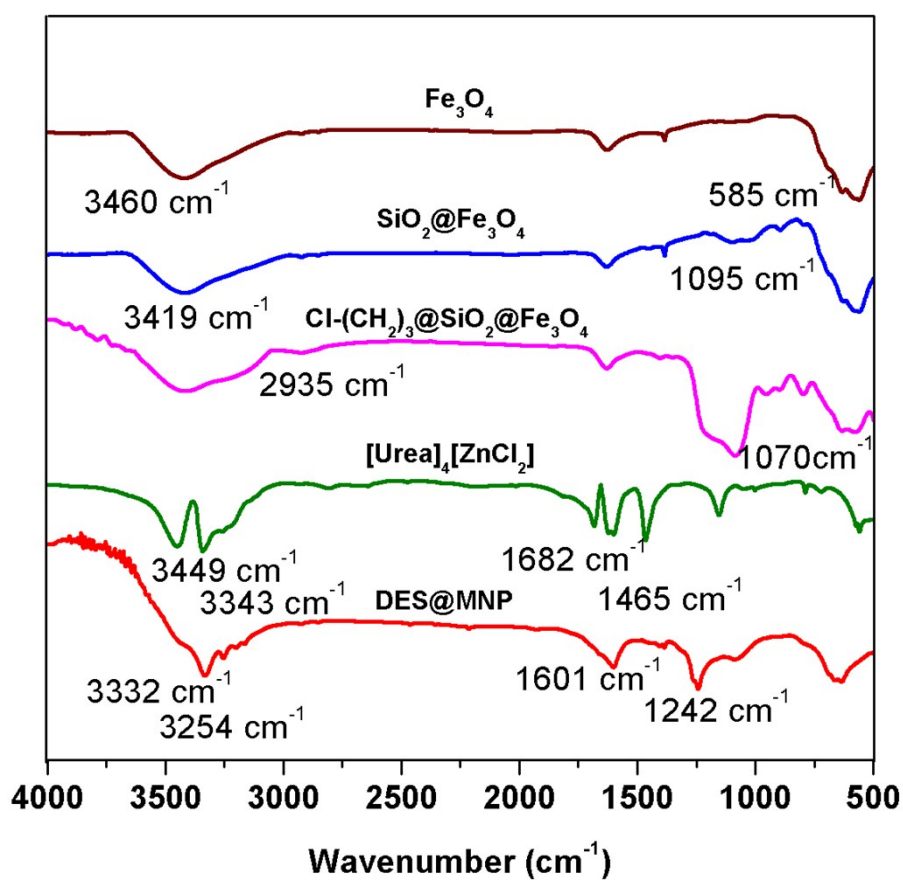

**Figure S1. FT-IR spectrum of  $\text{Fe}_3\text{O}_4$ ,  $\text{SiO}_2@\text{Fe}_3\text{O}_4$ ,  $\text{Cl}(\text{CH}_2)_3@\text{SiO}_2@\text{Fe}_3\text{O}_4$ ,  $[\text{Urea}]_4[\text{ZnCl}_2]$  and  $\text{DES}@MNP$**

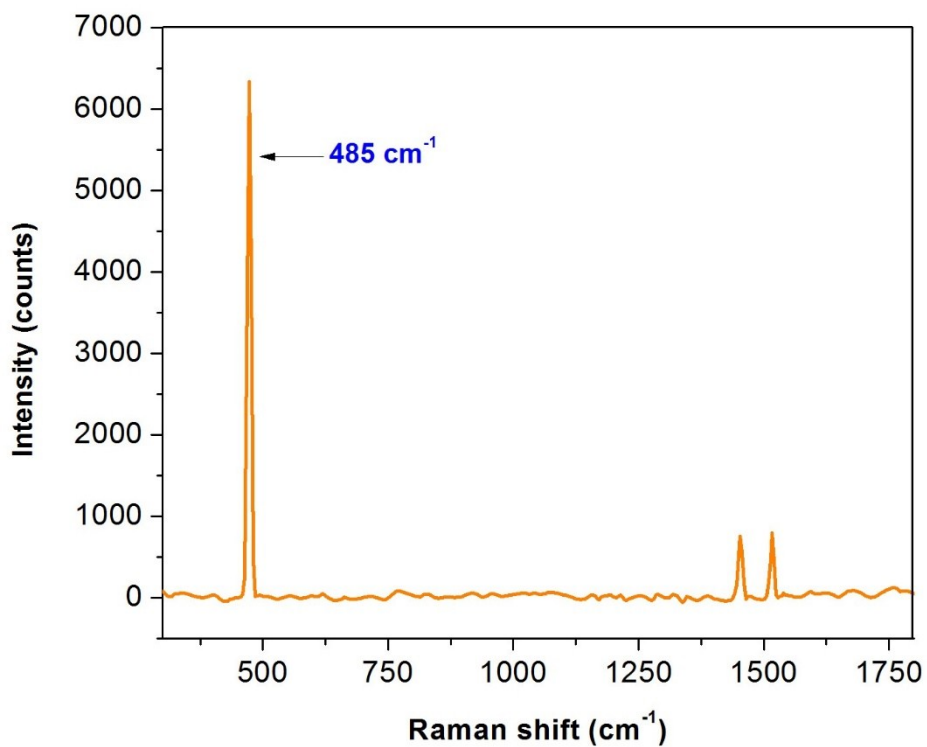

**Figure S2. Raman spectra of DES@MNP**

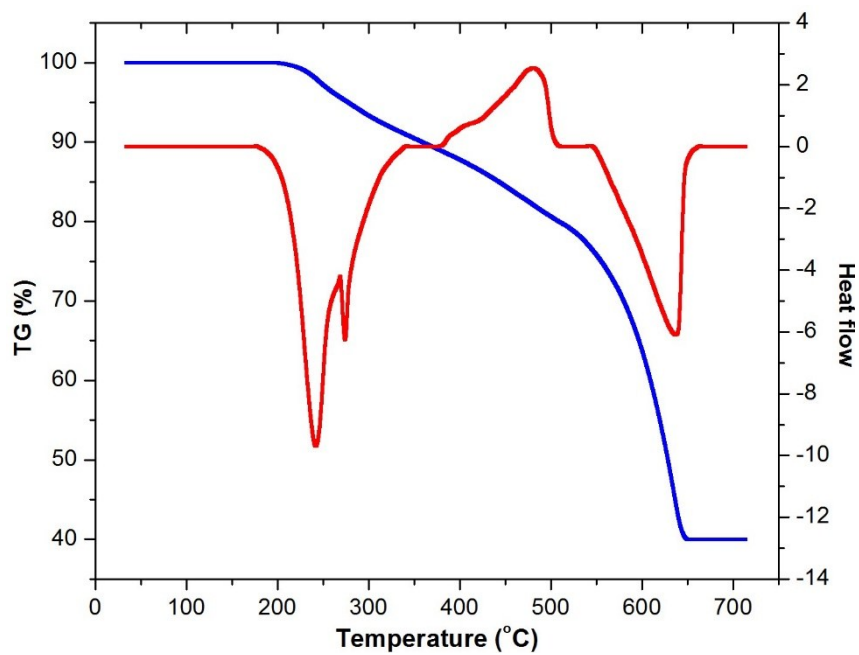

**Figure S3. TG and DSC analysis of DES@MNP**

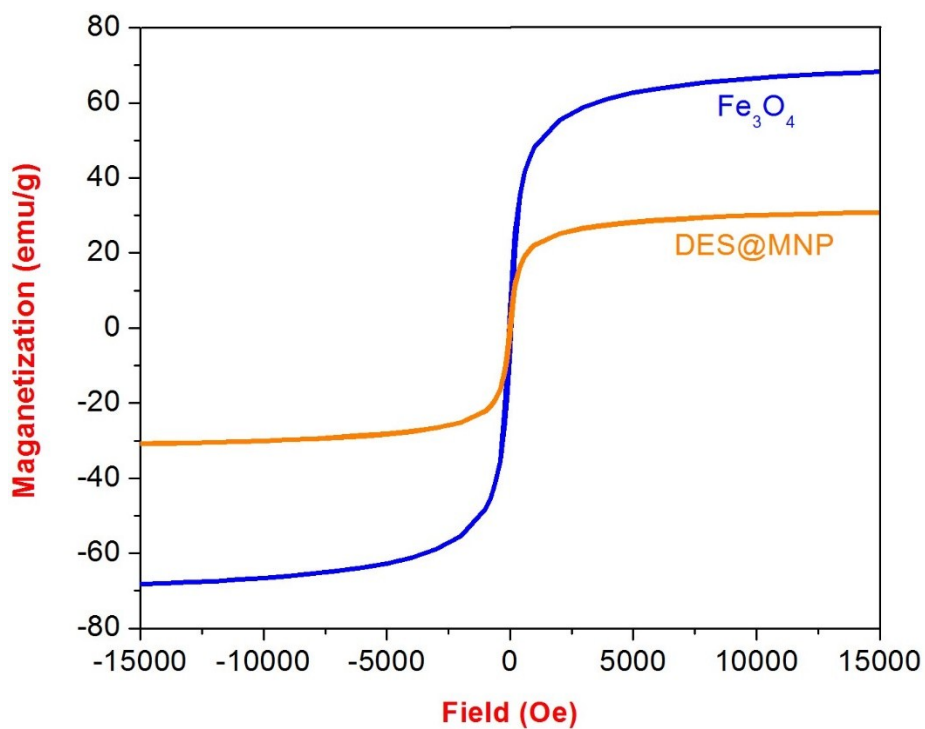

Figure S4. Magnetic curves of  $\text{Fe}_3\text{O}_4$  and DES@MNP

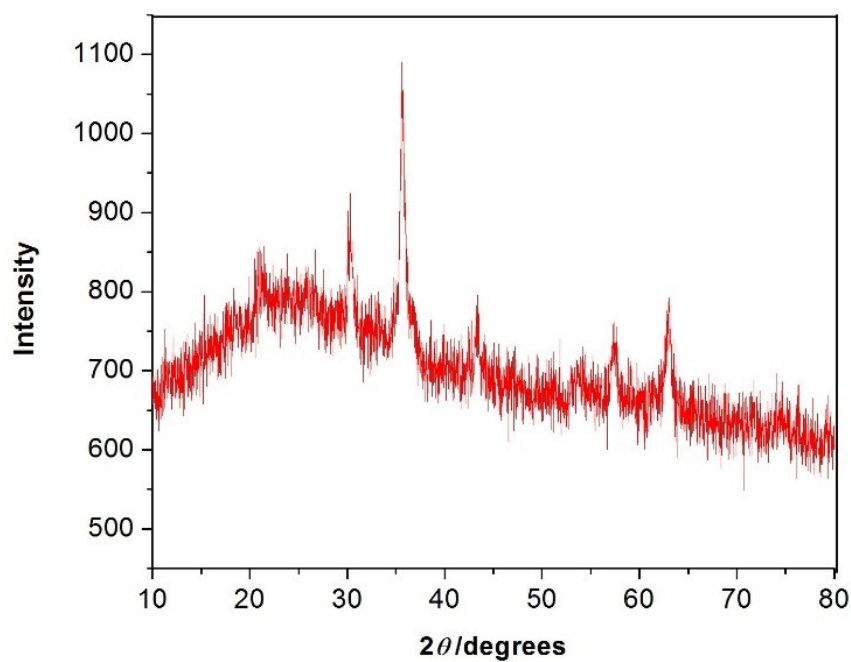

Figure S5. X-Ray diffraction pattern of DES@MNP

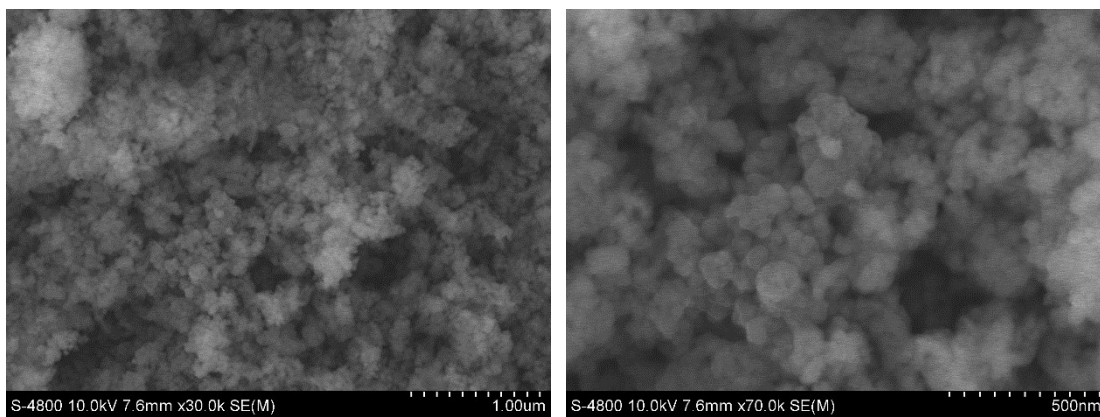

(a)

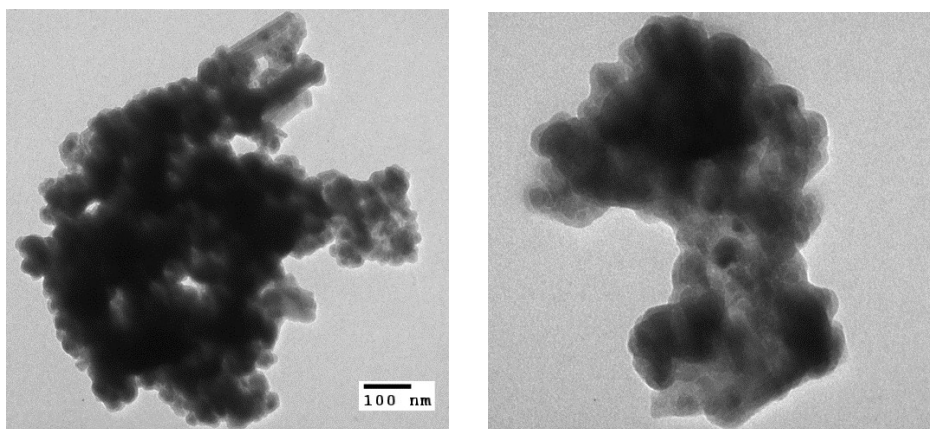

(b)

Figure S6. SEM (a) and TEM (b) images of DES@MNP

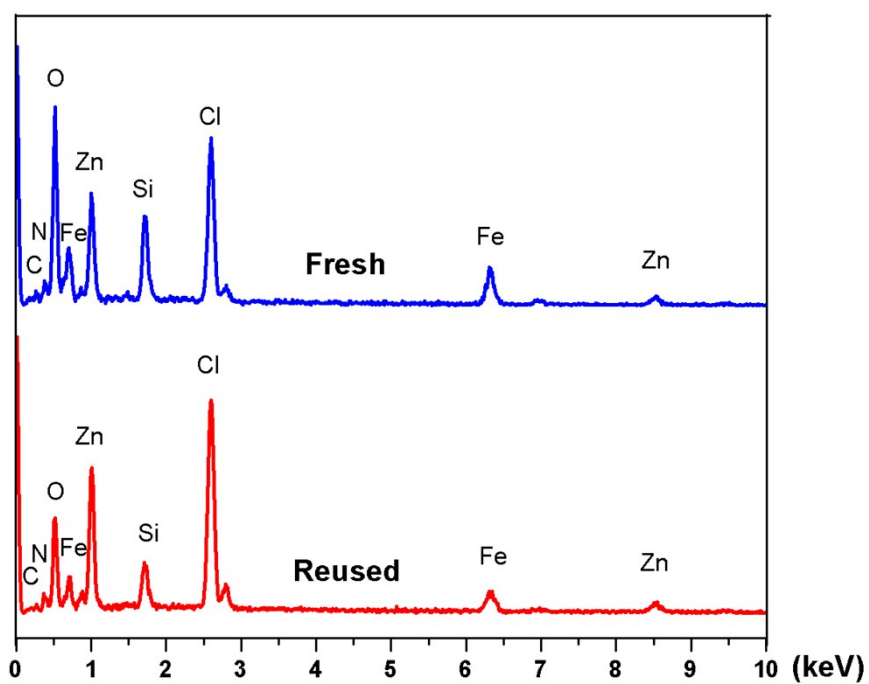

Figure S7. EDX spectrum of fresh catalyst and reused catalyst.

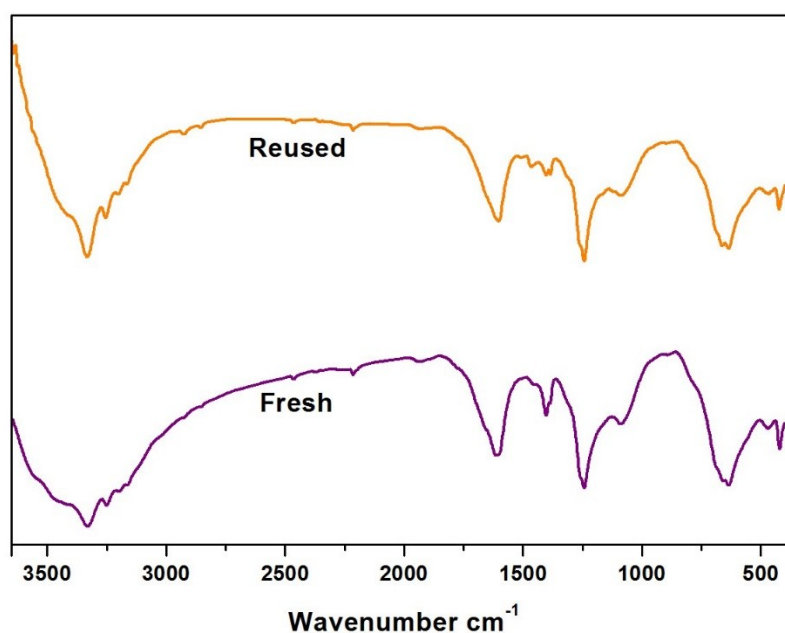

**Figure S8.** FT-IR spectra for the comparison of the fresh catalyst and the fifth-times reused catalyst.

**Section S3. Optimization of the reaction conditions on the synthesis of 2-phenyl-8*H*-thieno[2,3-*b*]indole**

**Table S1.** Effects of the additive on the synthesis of 2-phenyl-8*H*-thieno[2,3-*b*]indole

| Entry <sup>a</sup> | Additives (1 equivment)       | Yield <sup>b</sup> (%) |
|--------------------|-------------------------------|------------------------|
| 1                  | <i>N,N</i> -Dimethylformamide | 87                     |
| 2                  | Acetamide                     | 43                     |
| 3                  | Pyrrolidine                   | 38                     |
| 4                  | Piperidine                    | 54                     |
| 5                  | Triethylamine                 | 44                     |
| 6                  | Aniline                       | 19                     |
| 7                  | <i>N,N</i> -Dimethylaniline   | 26                     |
| 8                  | 1,4-Diazabicyclo[2.2.2]octane | 75                     |
| 9                  | 4-Ethylmorpholine             | 81                     |

<sup>a</sup>Reaction conditions: acetophenone (2.0 mmol, 240 mg), indole (1.0 mmol, 117 mg), sulfur (5.0 mmol, 160 mg), additive (1.0 mmol) and DES@MNP catalyst (10 mol%, 30 mg) were heated at 140 °C for 12 h.



<sup>b</sup>Yield of 2-phenyl-8*H*-thieno[2,3-*b*]indole was isolated yield by column chromatography (dichloromethane/petroleum ether 2:3).

**Table S2. Effects of solvents on the synthesis of 2-phenyl-8*H*-thieno[2,3-*b*]indole**

| Entry <sup>a</sup> | Type of Solvent | Solvent                       | Yield <sup>b</sup> (%) |
|--------------------|-----------------|-------------------------------|------------------------|
| 1                  |                 | Ethanol                       | Trace                  |
| 2                  | Polar protic    | <i>tert</i> -Butanol          | 17                     |
| 3                  |                 | <i>n</i> -Butanol             | 21                     |
| 4                  |                 | Ethyl acetate                 | 25                     |
| 5                  | Polar aprotic   | Acetonitrile                  | 70                     |
| 6                  |                 | Tetrahydrofuran               | 32                     |
| 7                  |                 | <i>N,N</i> -Dimethylformamide | 87                     |
| 8                  |                 | 1,4-Dioxane                   | 78                     |
| 9                  | Non polar       | Toluene                       | 35                     |
| 10                 |                 | <i>p</i> -Xylene              | 23                     |
| 11                 |                 | <i>n</i> -Hexane              | Trace                  |

<sup>a</sup>Reaction conditions: acetophenone (2.0 mmol, 240 mg), indole (1.0 mmol, 117 mg), sulfur (5.0 mmol, 160 mg), DMF (0.3 mL) and DES@MNP catalyst (10 mol%, 30 mg) were heated in 1.5 mL solvent at 140 °C for 12 h.

<sup>b</sup>Yield of 2-phenyl-8*H*-thieno[2,3-*b*]indole was isolated yield by column chromatography (dichloromethane/ petroleum ether 2:3).

**Table S3. Effects of temperature on the synthesis of 2-phenyl-8*H*-thieno[2,3-*b*]indole**

| Entry <sup>a</sup> | Temperature (°C) | Yield <sup>b</sup> (%) |
|--------------------|------------------|------------------------|
| 1                  | 80               | Trace                  |
| 2                  | 100              | 17                     |
| 3                  | 120              | 45                     |
| 4                  | 130              | 68                     |
| 5                  | 140              | 87                     |
| 6                  | 150              | 87                     |

<sup>a</sup>Reaction conditions: acetophenone (2.0 mmol, 240 mg), indole (1.0 mmol, 117 mg), sulfur (5.0 mmol, 160 mg), and DES@MNP catalyst (10 mol%, 30 mg) were heated in 1.5 mL DMF for 12 h.

<sup>b</sup>Yield of 2-phenyl-8*H*-thieno[2,3-*b*]indole was isolated yield by column chromatography (dichloromethane/ petroleum ether 2:3).

**Table S4. Effects of time on the synthesis of 2-phenyl-8*H*-thieno[2,3-*b*]indole**

| Entry <sup>a</sup> | Time (h) | Yield <sup>b</sup> (%) |
|--------------------|----------|------------------------|
| 1                  | 2        | Trace                  |
| 2                  | 4        | 14                     |
| 3                  | 6        | 37                     |
| 4                  | 8        | 59                     |
| 5                  | 10       | 78                     |
| 6                  | 12       | 87                     |
| 7                  | 14       | 88                     |

<sup>a</sup>Reaction conditions: acetophenone (2.0 mmol, 240 mg), indole (1.0 mmol, 117 mg), sulfur (5.0 mmol, 160 mg), and DES@MNP catalyst (10 mol%, 30 mg) were heated in 1.5 mL DMF at 140 °C.

<sup>b</sup>Yield of 2-phenyl-8*H*-thieno[2,3-*b*]indole was isolated by column chromatography (dichloromethane/ petroleum ether 2:3).

**Table S5. Effects of reactant ratio on the synthesis of 2-phenyl-8*H*-thieno[2,3-*b*]indole**

| Entry <sup>a</sup> | Molar ratio<br>Indole:acetophenone:sulfur | Yield <sup>b</sup> (%) |
|--------------------|-------------------------------------------|------------------------|
| 1                  | 1.0:1.0:1.0                               | Trace                  |
| 2                  | 1.0:1.5:1.0                               | 25                     |
| 3                  | 1.0:2.0:1.0                               | 31                     |
| 4                  | 1.0:2.0:1.5                               | 34                     |
| 5                  | 1.0:2.0:2.0                               | 37                     |
| 6                  | 1.0:2.0:3.0                               | 57                     |
| 7                  | 1.0:2.0:4.0                               | 76                     |

---

<sup>a</sup>Reaction conditions: acetophenone, indole, sulfur, and DES@MNP catalyst (10 mol%, 30 mg) were heated in 1.5 mL DMF at 140 °C for 12 h.

<sup>b</sup>Yield of 2-phenyl-8*H*-thieno[2,3-*b*]indole was isolated yield by column chromatography (dichloromethane/ petroleum ether 2:3).

#### Section S4. The experiment for proposed mechanism

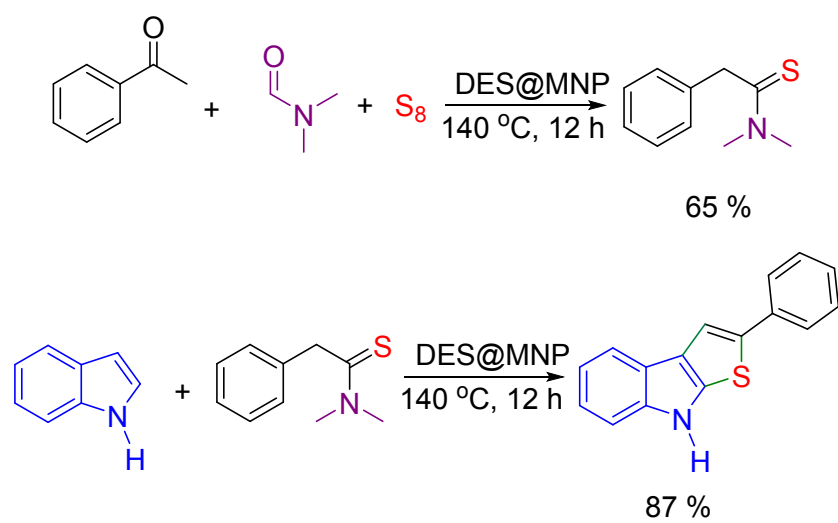

Scheme S2. Control experiments for mechanism investigation.

## Section S5. Spectral data

### 2-Phenyl-8*H*-thieno[2,3-*b*]indole (3a)

Analytical TLC on silica gel, 4:1 *n*-hexane/acetone  $R_f = 0.40$ ; yellowish solid, mp. 243–245 °C.

FT-IR (KBr, 4000–400  $\text{cm}^{-1}$ ): 3395, 3050, 1522, 1469, 1437, 1252, 830, 740, 687  $\text{cm}^{-1}$ .

$^1\text{H}$  NMR (500 MHz,  $\text{DMSO-}d_6$ ):  $\delta = 11.69$  (s, 1H), 7.87 (s, 1H), 7.80 (d,  $J = 8.0$  Hz, 1H), 7.66 (dt,  $J = 8.0, 1.5$  Hz, 2H), 7.47 (d,  $J = 8.0$  Hz, 1H), 7.43–7.39 (m, 2H), 7.26–7.23 (m, 1H), 7.20 (ddd,  $J = 8.5, 7.5, 1.0$  Hz, 1H), 7.12 (dd,  $J = 7.5, 1.0$  Hz, 1H).

$^{13}\text{C}$  NMR (125 MHz,  $\text{DMSO-}d_6$ ):  $\delta = 142.0, 141.1, 135.7, 135.2, 134.2, 129.6, 127.1, 125.0, 122.5, 122.1, 119.71, 119.3, 114.8, 112.2$ .

GC-MS (EI, 70 eV)  $m/z$  249  $[\text{M}]^+$ .

### 2-(*p*-Tolyl)-8*H*-thieno[2,3-*b*]indole (3b)

Analytical TLC on silica gel, 4:1 *n*-hexane/acetone  $R_f = 0.35$ ; white solid, mp. 223 °C.

FT-IR (KBr, 4000–400  $\text{cm}^{-1}$ ): 3431, 3028, 2955, 1647, 1026, 828, 768  $\text{cm}^{-1}$ .

$^1\text{H}$  NMR (500 MHz,  $\text{DMSO-}d_6$ ):  $\delta = 11.66$  (s, 1H), 7.80 (s, 1H), 7.78 (d,  $J = 8.0$  Hz, 1H), 7.55 (d,  $J = 8.0$  Hz, 2H), 7.46 (d,  $J = 8.0$  Hz, 1H), 7.22 (d,  $J = 7.5$  Hz, 1H), 7.19 (ddd,  $J = 8.0, 7.0, 1.0$  Hz, 1H), 7.13–7.08 (ddd,  $J = 8.0, 7.0, 1.0$  Hz, 1H), 2.32 (s, 3H).

$^{13}\text{C}$  NMR (125 MHz,  $\text{DMSO-}d_6$ ):  $\delta = 141.5, 140.3, 135.9, 134.9, 132.5, 129.7, 124.5, 124.4, 121.9, 121.6, 119.2, 118.8, 113.6, 111.7, 20.7$ .

HRMS (ESI)  $m/z$ :  $[\text{M}]^+$  calcd for  $\text{C}_{17}\text{H}_{13}\text{NS}$  263.0769, found 263.0724.

### 2-(4-Methoxyphenyl)-8*H*-thieno[2,3-*b*]indole (3c)

Analytical TLC on silica gel, 4:1 *n*-hexane/acetone  $R_f = 0.45$ ; white solid, mp. 220 °C.

FT-IR (KBr, 4000–400  $\text{cm}^{-1}$ ): 3391, 3051, 2957, 2918, 1529, 1480, 1431, 1290, 1255, 821, 742, 508  $\text{cm}^{-1}$ .

$^1\text{H}$  NMR (500 MHz, acetone- $d_6$ ):  $\delta$  = 10.69 (s, 1H), 7.80 (d,  $J$  = 7.5 Hz, 1H), 7.64 (s, 1H), 7.60 (d,  $J$  = 9.0 Hz, 2H), 7.50 (d,  $J$  = 8.0 Hz, 1H), 7.20 (td,  $J$  = 8.0, 1.0 Hz, 1H), 7.12 (td,  $J$  = 7.5, 1.0 Hz, 1H), 6.98 (d,  $J$  = 9.0 Hz, 2H), 3.83 (s, 3H).

$^{13}\text{C}$  NMR (125 MHz, acetone- $d_6$ ):  $\delta$  = 159.8, 142.8, 141.2, 136.7, 129.4, 127.1, 126.2, 123.2, 122.8, 120.3, 119.7, 115.3, 113.5, 112.5, 55.7.

GC-MS (EI, 70 eV)  $m/z$  279  $[\text{M}]^+$ .

### **2-(4-Fluorophenyl)-8H-thieno[2,3-*b*]indole (3d)**

Analytical TLC on silica gel, 4:1 *n*-hexane/acetone  $R_f$  = 0.32; yellowish solid, mp. 251–252 °C.

FT-IR (KBr, 4000–400  $\text{cm}^{-1}$ ): 3383, 3051, 1527, 1476, 1427, 1236, 828, 811, 1126, 743, 674, 496  $\text{cm}^{-1}$ .

$^1\text{H}$  NMR (500 MHz, DMSO- $d_6$ ):  $\delta$  = 11.68 (s, 1H), 7.83 (s, 1H), 7.78 (d,  $J$  = 8.0 Hz, 1H), 7.71–7.68 (m, 2H), 7.47 (d,  $J$  = 8.0 Hz, 1H), 7.28–7.23 (m, 2H), 7.20 (ddd,  $J$  = 8.0, 7.0, 1.0 Hz, 1H), 7.11 (ddd,  $J$  = 8.0, 7.0, 1.0 Hz, 1H).

$^{13}\text{C}$  NMR (125 MHz, DMSO- $d_6$ ):  $\delta$  = 161.5 (d,  $J$  = 242.2 Hz), 141.9 (s), 141.1 (s), 134.0 (s), 132.3 (d,  $J$  = 0.7 Hz), 126.9 (d,  $J$  = 7.9 Hz), 124.9 (s), 122.5 (s), 122.0 (s), 119.7 (s), 119.3 (s), 116.4 (d,  $J$  = 2.74 Hz), 114.9 (s), 112.2 (s).

HRMS (ESI)  $m/z$ :  $[\text{M}-\text{H}]^+$  calcd for  $\text{C}_{16}\text{H}_9\text{NFS}$  266.0440, found 266.0445.

### **2-(4-Nitrophenyl)-8H-thieno[2,3-*b*]indole (3e)**

Analytical TLC on silica gel, 4:1 *n*-hexane/acetone  $R_f$  = 0.35; orange solid, mp. 257 °C.

FT-IR (KBr, 4000–400  $\text{cm}^{-1}$ ): 3433, 2256, 2129, 1646, 1026, 1000, 827, 765.

$^1\text{H}$  NMR (500 MHz, DMSO- $d_6$ )  $\delta$  11.88 (s, 1H), 8.24 (d,  $J$  = 9.0 Hz, 2H), 8.23 (s, 1H), 7.90 (d,  $J$  = 9.0 Hz, 2H), 7.84 (d,  $J$  = 8.0 Hz, 1H), 7.51 (d,  $J$  = 8.0 Hz, 1H), 7.27–7.22 (m, 1H), 7.18–7.14 (m, 1H).

$^{13}\text{C}$  NMR (125 MHz,  $\text{DMSO-}d_6$ )  $\delta$  142.2, 142.0, 141.7, 141.5, 138.4, 126.3, 125.1, 124.7, 124.7, 122.9, 119.9, 119.3, 118.5, 112.1.

GC-MS (EI, 70 eV)  $m/z$ : 294 ( $[\text{M}]^+$ ).

### **2-(Thiophen-2-yl)-8*H*-thieno[2,3-*b*]indole (3f)**

Analytical TLC on silica gel, 4:1 *n*-hexane/acetone  $R_f$  = 0.30; orange solid, mp. 178 °C.

FT-IR (KBr, 4000–400  $\text{cm}^{-1}$ ): 3408, 1635, 1475, 1429, 1410, 1384, 812, 742, 684  $\text{cm}^{-1}$ .

$^1\text{H}$  NMR (500 MHz,  $\text{DMSO-}d_6$ ):  $\delta$  = 11.68 (s, 1H), 7.80 (d,  $J$  = 8.0 Hz, 1H), 7.63 (s, 1H), 7.47 (d,  $J$  = 8.0 Hz, 1H), 7.43 (dd,  $J$  = 5.0, 1.0 Hz, 1H), 7.23 (dd,  $J$  = 3.5, 1.0 Hz, 1H), 7.20 (ddd,  $J$  = 8.0, 7.0, 1.0 Hz, 1H), 7.10 (ddd,  $J$  = 8.0, 7.0, 1.0 Hz, 1H), 7.07 (dd,  $J$  = 5.0, 3.5 Hz, 1H).

$^{13}\text{C}$  NMR (125 MHz,  $\text{DMSO-}d_6$ ):  $\delta$  = 141.5, 140.1, 138.2, 128.1, 127.9, 124.0, 122.4, 122.4, 121.4, 119.3, 118.9, 117.9, 114.7, 111.8.

HRMS (ESI)  $m/z$ :  $[\text{M}]^+$  calcd for  $\text{C}_{14}\text{H}_9\text{NS}_2$  255.0176, found 255.0171.

### **5-Methyl-2-phenyl-8*H*-thieno[2,3-*b*]indole (3g)**

Analytical TLC on silica gel, 4:1 *n*-hexane/acetone  $R_f$  = 0.35; white solid, mp. 220–221 °C.

FT-IR (KBr, 4000–400  $\text{cm}^{-1}$ ): 3378, 3027, 2920, 2852, 1524, 1478, 1443, 1254, 831, 753, 688, 588  $\text{cm}^{-1}$ .

$^1\text{H}$  NMR (500 MHz,  $\text{DMSO-}d_6$ ):  $\delta$  = 11.55 (s, 1H), 7.82 (s, 1H), 7.66–7.64 (m, 2H), 7.58 (s, 1H), 7.42–7.39 (m, 2H), 7.35 (d,  $J$  = 8.5 Hz, 1H), 7.26–7.22 (m, 1H), 7.02 (ddd,  $J$  = 8.0, 1.5, 0.5 Hz, 1H), 2.43 (s, 3H).

$^{13}\text{C}$  NMR (125 MHz,  $\text{DMSO-}d_6$ ):  $\delta$  = 140.7, 139.8, 135.3, 134.3, 129.1, 127.8, 126.5, 124.5, 124.2, 123.3, 121.7, 118.7, 114.2, 111.4, 21.1.

HRMS (ESI)  $m/z$ :  $[\text{M}]^+$  calcd for  $\text{C}_{17}\text{H}_{13}\text{NS}$  263.0769, found 263.0722.

### **5-Methyl-2-(*p*-tolyl)-8*H*-thieno[2,3-*b*]indole (3h)**

Analytical TLC on silica gel, 4:1 *n*-hexane/acetone  $R_f$  = 0.40; white solid, mp. 245 °C.

FT-IR (KBr, 4000–400  $\text{cm}^{-1}$ ): 3370, 3017, 2916, 2853, 1530, 1480, 1425, 1256, 808, 752, 588, 487  $\text{cm}^{-1}$ .

$^1\text{H}$  NMR (500 MHz,  $\text{DMSO-}d_6$ ):  $\delta$  = 11.53 (s, 1H), 7.75 (s, 1H), 7.56 (s, 1H), 7.53 (d,  $J$  = 8.0 Hz, 2H), 7.34 (d,  $J$  = 8.0 Hz, 1H), 7.21 (d,  $J$  = 8.0 Hz, 2H), 7.01 (d,  $J$  = 8.0 Hz, 1H), 2.42 (s, 3H), 2.31 (s, 3H).

$^{13}\text{C}$  NMR (125 MHz,  $\text{DMSO-}d_6$ ):  $\delta$  = 140.3, 139.8, 135.8, 134.6, 132.5, 129.6, 127.7, 124.4, 124.1, 123.2, 121.7, 118.6, 113.5, 111.3, 21.2, 20.7.

HRMS (ESI)  $m/z$ :  $[\text{M}]^+$  calcd for  $\text{C}_{18}\text{H}_{15}\text{NS}$  277.0925, found 277.0918.

### **2-(4-Methoxyphenyl)-5-methyl-8H-thieno[2,3-*b*]indole (3i)**

Analytical TLC on silica gel, 4:1 *n*-hexane/acetone  $R_f$  = 0.40; white solid, mp. 241  $^\circ\text{C}$ .

FT-IR (KBr, 4000–400  $\text{cm}^{-1}$ ): 3414, 3025, 2922, 1637, 1529, 1384, 1294, 1255, 821, 509  $\text{cm}^{-1}$ .

$^1\text{H}$  NMR (500 MHz,  $\text{DMSO-}d_6$ ):  $\delta$  = 11.49 (s, 1H), 7.65 (s, 1H), 7.57 (m, 3H), 7.34 (d,  $J$  = 8.5 Hz, 1H), 7.00 (m, 3H), 3.78 (s, 3H), 2.42 (s, 3H).

$^{13}\text{C}$  NMR (125 MHz,  $\text{DMSO-}d_6$ ):  $\delta$  = 158.7, 140.5, 140.2, 135.0, 128.5, 128.2, 126.4, 124.6, 123.6, 122.2, 119.1, 115.0, 113.3, 111.8, 55.7, 21.7.

HRMS (ESI)  $m/z$ :  $[\text{M}]^+$  calcd for  $\text{C}_{18}\text{H}_{15}\text{NOS}$  293.0874, found 293.0867.

### **2-(4-Fluorophenyl)-5-methyl-8H-thieno[2,3-*b*]indole (3j)**

Analytical TLC on silica gel, 4:1 *n*-hexane/acetone  $R_f$  = 0.50; white solid, mp. 231  $^\circ\text{C}$ .

FT-IR (KBr, 4000–400  $\text{cm}^{-1}$ ): 3372, 3029, 2922, 2853, 1639, 1529, 1478, 1233, 824, 810, 532  $\text{cm}^{-1}$ .

$^1\text{H}$  NMR (500 MHz,  $\text{DMSO-}d_6$ ):  $\delta$  = 11.56 (s, 1H), 7.78 (s, 1H), 7.69–7.66 (m, 2H), 7.57 (s, 1H), 7.36 (d,  $J$  = 8.0 Hz, 1H), 7.24 (t,  $J$  = 8.5 Hz, 2H), 7.02 (dd,  $J$  = 8.5, 1.0 Hz, 1H), 2.43 (s, 3H).



$^{13}\text{C}$  NMR (125 MHz,  $\text{DMSO-}d_6$ ):  $\delta = 161.0$  (d,  $J = 242.4$  Hz), 140.7 (s), 139.8 (s), 133.2 (s), 131.9 (d,  $J = 3.1$  Hz), 127.8 (s), 126.4 (d,  $J = 7.9$  Hz), 124.2 (s), 123.4 (s), 121.7 (s), 118.7 (s), 115.9 (d,  $J = 21.6$  Hz), 114.4 (s), 111.4 (s), 21.1 (s).

HRMS (ESI)  $m/z$ :  $[\text{M}]^+$  calcd for  $\text{C}_{17}\text{H}_{12}\text{FNS}$  281.0674, found 281.0662.

### **5-Methoxy-2-phenyl-8H-thieno[2,3-*b*]indole (3k)**

Analytical TLC on silica gel, 4:1 *n*-hexane/acetone  $R_f = 0.37$ ; white solid, mp. 210 °C.

FT-IR (KBr, 4000–400  $\text{cm}^{-1}$ ): 3410, 3057, 2990, 2831, 1525, 1480, 1428, 1266, 1215, 828, 753, 690, 475  $\text{cm}^{-1}$ .

$^1\text{H}$  NMR (500 MHz,  $\text{DMSO-}d_6$ ):  $\delta = 11.52$  (s, 1H), 7.84 (s, 1H), 7.64 (d,  $J = 7.0$  Hz, 2H), 7.40 (t,  $J = 7.5$  Hz, 2H), 7.37 (d,  $J = 9.0$  Hz, 1H), 7.35 (d,  $J = 2.0$  Hz, 1H), 7.24 (t,  $J = 7.5$  Hz, 1H), 6.84 (dd,  $J = 9.0, 2.5$  Hz, 1H), 3.81 (s, 3H).

$^{13}\text{C}$  NMR (125 MHz,  $\text{DMSO-}d_6$ ):  $\delta = 153.5, 141.2, 136.4, 135.3, 134.2, 129.1, 126.5, 124.4, 122.0, 114.3, 112.3, 111.2, 101.8, 55.4$ .

HRMS (ESI)  $m/z$ :  $[\text{M}]^+$  calcd for  $\text{C}_{17}\text{H}_{13}\text{NOS}$  279.0718, found 279.0709.

### **5-Methoxy-2-(*p*-tolyl)-8H-thieno[2,3-*b*]indole (3l)**

Analytical TLC on silica gel, 4:1 *n*-hexane/acetone  $R_f = 0.45$ ; white solid, mp. 201 °C.

FT-IR (KBr, 4000–400  $\text{cm}^{-1}$ ): 3398, 3048, 2995, 2945, 1531, 1478, 1423, 1212, 833, 808, 751, 673  $\text{cm}^{-1}$ .

$^1\text{H}$  NMR (500 MHz,  $\text{DMSO-}d_6$ ):  $\delta = 11.48$  (s, 1H), 7.76 (s, 1H), 7.53 (d,  $J = 8.0$  Hz, 2H), 7.35 (d,  $J = 8.5$  Hz, 1H), 7.33 (d,  $J = 2.0$  Hz, 1H), 7.21 (d,  $J = 8.0$  Hz, 2H), 6.82 (dd,  $J = 8.5, 2.0$  Hz, 1H), 3.81 (s, 3H), 2.31 (s, 3H).

$^{13}\text{C}$  NMR (125 MHz,  $\text{DMSO-}d_6$ ):  $\delta = 153.4, 140.8, 136.4, 135.8, 134.4, 132.5, 129.6, 124.4, 124.4, 122.0, 113.6, 112.3, 111.0, 101.7, 55.4, 20.7$ .

HRMS (ESI)  $m/z$ :  $[\text{M}]^+$  calcd for  $\text{C}_{18}\text{H}_{15}\text{NOS}$  293.0874, found 293.0864.

### **5-Methoxy-2-(4-methoxyphenyl)-8H-thieno[2,3-*b*]indole (3m)**

Analytical TLC on silica gel, 4:1 *n*-hexane/acetone  $R_f = 0.50$ ; white solid, mp. 231 °C.

FT-IR (KBr, 4000–400  $\text{cm}^{-1}$ ): 3398, 3051, 2295, 2248, 1530, 1478, 1455, 1265, 1213, 1170, 1113, 1085, 833, 808, 751, 673  $\text{cm}^{-1}$ .

$^1\text{H}$  NMR (500 MHz, acetone- $d_6$ ):  $\delta = 10.63$  (s, 1H), 7.60 (s, 1H), 7.58 (d,  $J = 9.0$  Hz, 2H), 7.38 (d,  $J = 9.0$  Hz, 1H), 7.36 (d,  $J = 2.0$  Hz, 1H), 6.97 (d,  $J = 9.0$  Hz, 2H), 6.84 (dd,  $J = 9.0, 2.0$  Hz, 1H), 3.85 (s, 3H), 3.82 (s, 3H).

$^{13}\text{C}$  NMR (125 MHz, acetone- $d_6$ ):  $\delta = 159.8, 155.2, 141.9, 137.9, 136.2, 129.5, 127.1, 126.1, 123.6, 115.4, 113.5, 113.1, 113.0, 112.2, 102.7, 56.1, 55.7$ .

GC-MS (EI, 70 eV)  $m/z$  309  $[\text{M}]^+$ .

### **5-Methoxy-2-(4-fluorophenyl)-8*H*-thieno[2,3-*b*]indole (3n)**

Analytical TLC on silica gel, 4:1 *n*-hexane/acetone  $R_f = 0.47$ ; white solid, mp. 200–201 °C.

FT-IR (KBr, 4000–400  $\text{cm}^{-1}$ ): 3433, 3021, 2923, 1626, 1530, 1479, 1423, 1218, 1168, 1025, 825  $\text{cm}^{-1}$ .

$^1\text{H}$  NMR (500 MHz, DMSO- $d_6$ ):  $\delta = 11.51$  (s, 1H), 7.79 (s, 1H), 7.67 (dd,  $J = 9.0, 5.0$  Hz, 2H), 7.37 (d,  $J = 8.5$  Hz, 1H), 7.34 (d,  $J = 2.5$  Hz, 1H), 7.24 (m, 2H), 6.84 (dd,  $J = 8.5, 2.5$  Hz, 1H), 3.81 (s, 3H).

$^{13}\text{C}$  NMR (125 MHz, DMSO- $d_6$ ):  $\delta = 161.0$  (d,  $J = 242.4$  Hz), 153.5 (s), 141.1 (s), 136.4 (s), 132.98 (s), 131.9 (d,  $J = 3.1$  Hz), 126.35 (d,  $J = 7.9$  Hz), 124.4 (s), 121.9 (s), 116.0 (d,  $J = 21.6$  Hz), 114.4 (s), 112.3 (s), 111.2 (s), 101.7 (s), 55.4 (s).

HRMS (ESI)  $m/z$  calcd for  $[\text{M}]^+ \text{C}_{17}\text{H}_{12}\text{FNOS}$  297.0624, found 297.0618.

### **5-Fluoro-2-phenyl-8*H*-thieno[2,3-*b*]indole (3o)**

Analytical TLC on silica gel, 4:1 *n*-hexane/acetone  $R_f = 0.54$ ; yellowish solid, mp. 255 °C.

FT-IR (KBr, 4000–400  $\text{cm}^{-1}$ ): 3408, 3065, 1524, 1480, 1441, 1169, 1256, 1170, 1077, 830, 807, 739, 687  $\text{cm}^{-1}$ .

$^1\text{H}$  NMR (500 MHz,  $\text{DMSO-}d_6$ ):  $\delta$  = 11.77 (s, 1H), 7.84 (s, 1H), 7.65 (d,  $J$  = 7.5 Hz, 2H), 7.58 (dd,  $J$  = 9.5, 2.5 Hz, 1H), 7.47 (dd,  $J$  = 9.0, 4.5 Hz, 1H), 7.42 (t,  $J$  = 7.5 Hz, 2H), 7.26 (t,  $J$  = 7.5 Hz, 1H), 7.04 (td,  $J$  = 9.0, 2.5 Hz, 1H).

$^{13}\text{C}$  NMR (125 MHz,  $\text{DMSO-}d_6$ ):  $\delta$  = 156.8 (d,  $J$  = 231.0 Hz), 142.3 (s), 138.0 (s), 135.0 (d,  $J$  = 18.8 Hz), 129.1 (s), 126.7 (s), 124.6 (s), 124.3 (d,  $J$  = 4.0 Hz), 121.69 (d,  $J$  = 10.5 Hz), 114.19 (s), 112.5 (d,  $J$  = 9.6 Hz), 109.6 (d,  $J$  = 25.5 Hz), 104.2 (d,  $J$  = 24.0 Hz).

HRMS (ESI)  $m/z$  calcd for  $[\text{M}]^+$   $\text{C}_{16}\text{H}_{10}\text{FNS}$  267.0518, found 267.0514.

### **5-Fluoro-2-(*p*-tolyl)-8*H*-thieno[2,3-*b*]indole (3p)**

Analytical TLC on silica gel, 4:1 *n*-hexane/acetone  $R_f$  = 0.47; yellowish solid, mp. 264.5–265.5 °C.

FT-IR (KBr, 4000–400  $\text{cm}^{-1}$ ): 3391, 3047, 2919, 2852, 1530, 1482, 1427, 1257, 1170, 810, 756, 593  $\text{cm}^{-1}$ .

$^1\text{H}$  NMR (500 MHz,  $\text{DMSO-}d_6$ ):  $\delta$  = 11.74 (s, 1H), 7.77 (s, 1H), 7.57 (dd,  $J$  = 9.5, 2.5 Hz, 1H), 7.53 (d,  $J$  = 8.0 Hz, 2H), 7.46 (dd,  $J$  = 8.5, 4.5 Hz, 1H), 7.22 (d,  $J$  = 8.0 Hz, 2H), 7.03 (td,  $J$  = 9.0, 2.5 Hz, 1H), 2.32 (s, 3H).

$^{13}\text{C}$  NMR (125 MHz,  $\text{DMSO-}d_6$ ):  $\delta$  = 156.8 (d,  $J$  = 231.0 Hz), 142.0 (s), 138.0 (s), 136.1 (s), 135.1 (s), 132.3 (s), 129.6 (s), 124.5 (s), 124.3 (d,  $J$  = 4.1 Hz), 121.7 (d,  $J$  = 10.4 Hz), 113.5 (s), 112.5 (d,  $J$  = 9.6 Hz), 109.5 (d,  $J$  = 25.5 Hz), 104.1 (d,  $J$  = 23.9 Hz), 20.65 (s).

HRMS (ESI)  $m/z$  calcd for  $[\text{M}]^+$   $\text{C}_{17}\text{H}_{12}\text{FNS}$  281.0674, found 281.0666.

### **5-Chloro-2-phenyl-8*H*-thieno[2,3-*b*]indole (3q)**

Analytical TLC on silica gel, 4:1 *n*-hexane/acetone  $R_f$  = 0.50; yellowish solid, mp. 216 °C.

FT-IR (KBr, 4000–400  $\text{cm}^{-1}$ ): 3387, 3075, 2922, 1519, 1477, 1433, 1244, 827, 792, 758, 689, 580  $\text{cm}^{-1}$ .

$^1\text{H}$  NMR (500 MHz,  $\text{DMSO-}d_6$ ):  $\delta$  = 11.88 (s, 1H), 7.87 (s, 2H), 7.65 (d,  $J$  = 7.5 Hz, 2H), 7.50 (d,  $J$  = 8.5 Hz, 1H), 7.42 (t,  $J$  = 7.5 Hz, 2H), 7.27 (t,  $J$  = 7.5 Hz, 1H), 7.20 (dd,  $J$  = 8.5, 2.0 Hz, 1H).

$^{13}\text{C}$  NMR (125 MHz,  $\text{DMSO-}d_6$ ):  $\delta$  = 142.0, 139.8, 135.3, 1345.0, 129.1, 126.8, 124.6, 123.9, 123.7, 122.5, 121.7, 118.3, 114.2, 113.1.

HRMS (ESI)  $m/z$  calcd for  $[\text{M}]^+$   $\text{C}_{16}\text{H}_{10}\text{ClNS}$  283.0222, found 283.0176.

### **5-Chloro-2-(*p*-tolyl)-8*H*-thieno[2,3-*b*]indole (3r)**

Analytical TLC on silica gel, 4:1 *n*-hexane/acetone  $R_f$  = 0.45; yellowish solid, mp. 230 °C.

FT-IR (KBr, 4000–400  $\text{cm}^{-1}$ ): 3381, 3012, 2918, 2852, 1527, 1477, 1424, 1280, 1050, 811, 793, 698, 580, 488  $\text{cm}^{-1}$ .

$^1\text{H}$  NMR (500 MHz,  $\text{DMSO-}d_6$ ):  $\delta$  = 11.85 (s, 1H), 7.85 (d,  $J$  = 2.0 Hz, 1H), 7.79 (s, 1H), 7.53 (d,  $J$  = 8.0 Hz, 2H), 7.49 (d,  $J$  = 8.5 Hz, 1H), 7.22 (d,  $J$  = 8.0 Hz, 2H), 7.19 (dd,  $J$  = 8.5, 2.0 Hz, 1H), 2.31 (s, 3H).

$^{13}\text{C}$  NMR (125 MHz,  $\text{DMSO-}d_6$ ):  $\delta$  = 141.6, 139.8, 136.2, 135.6, 132.2, 129.7, 124.6, 123.8, 123.6, 122.5, 121.6, 118.2, 113.5, 113.1, 20.7.

HRMS (ESI)  $m/z$  calcd for  $[\text{M}]^+$   $\text{C}_{17}\text{H}_{12}\text{ClNS}$  297.0379, found 297.0364.

### **5-Chloro-2-(4-methoxyphenyl)-8*H*-thieno[2,3-*b*]indole (3s)**

Analytical TLC on silica gel, 4:1 *n*-hexane/acetone  $R_f$  = 0.45; yellowish solid, mp. 213–214 °C.

FT-IR (KBr, 4000–400  $\text{cm}^{-1}$ ): 3392, 3070, 2961, 2836, 1605, 1528, 1460, 1427, 1255, 1179, 1030, 917, 872, 820  $\text{cm}^{-1}$ .

$^1\text{H}$  NMR (500 MHz, acetone- $d_6$ ):  $\delta$  = 11.55 (s, 1H), 7.82 (d,  $J$  = 2.0 Hz, 1H), 7.65 (s, 1H), 7.59 (d,  $J$  = 9.0 Hz, 2H), 7.50 (d,  $J$  = 9.0 Hz, 1H), 7.18 (dd,  $J$  = 9.0, 2.0 Hz, 1H), 6.99 (d,  $J$  = 9.0 Hz, 2H), 3.82 (s, 3H).

$^{13}\text{C}$  NMR (125 MHz, acetone- $d_6$ ):  $\delta$  = 159.7, 142.6, 141.0, 136.9, 129.0, 127.0, 125.1, 125.0, 123.8, 122.4, 119.0, 115.2, 113.6, 113.3, 55.6.

HRMS (ESI)  $m/z$  calcd for  $[\text{M}]^+$   $\text{C}_{17}\text{H}_{12}\text{ClNOS}$  313.0328, found 313.0320.

### **5-Chloro-2-(4-fluorophenyl)-8*H*-thieno[2,3-*b*]indole (3t)**

Analytical TLC on silica gel, 4:1 *n*-hexane/acetone  $R_f$  = 0.55; yellowish solid, mp. 176 °C.

FT-IR (KBr, 4000–400  $\text{cm}^{-1}$ ): 3404, 3019, 2922, 2852, 1640, 1528, 1478, 1423, 1240, 1105, 1054, 816, 500  $\text{cm}^{-1}$ .

$^1\text{H}$  NMR (500 MHz, DMSO- $d_6$ ):  $\delta$  = 11.87 (s, 1H), 7.85 (d,  $J$  = 2.0 Hz, 1H), 7.81 (s, 1H), 7.70–7.64 (m, 2H), 7.50 (d,  $J$  = 8.5 Hz, 1H), 7.26 (m, 2H), 7.20 (dd,  $J$  = 8.5, 2.0 Hz, 1H).

$^{13}\text{C}$  NMR (125 MHz, DMSO- $d_6$ ):  $\delta$  = 161.1 (d,  $J$  = 242.8 Hz), 142.0 (s), 139.8 (s), 134.2 (s), 131.6 (d,  $J$  = 3.2 Hz), 126.60 (d,  $J$  = 8.0 Hz), 123.78 (d,  $J$  = 15.6 Hz), 122.5 (s), 121.8 (s), 118.3 (s), 116.1 (s), 116.0 (s), 114.4 (s), 113.2 (s).

HRMS (ESI)  $m/z$  calcd for  $[\text{M}]^+$   $\text{C}_{16}\text{H}_9\text{ClFNS}$  301.0128, found 301.0087.

### **5-Bromo-2-phenyl-8*H*-thieno[2,3-*b*]indole (3u)**

Analytical TLC on silica gel, 4:1 *n*-hexane/acetone  $R_f$  = 0.50; yellowish solid, mp. 219–220 °C.

FT-IR (KBr, 4000–400  $\text{cm}^{-1}$ ): 3387, 3074, 1517, 1475, 1430, 1282, 1243, 827, 790, 757, 689, 588, 475  $\text{cm}^{-1}$ .

$^1\text{H}$  NMR (500 MHz, DMSO- $d_6$ ):  $\delta$  = 11.89 (s, 1H), 8.01 (d,  $J$  = 2.0 Hz, 1H), 7.87 (s, 1H), 7.65 (d,  $J$  = 7.5 Hz, 2H), 7.45 (d,  $J$  = 8.5 Hz, 1H), 7.42 (t,  $J$  = 7.5, 1H), 7.31 (dd,  $J$  = 8.5, 2.0 Hz, 1H), 7.27 (t,  $J$  = 7.5 Hz, 1H).

$^{13}\text{C}$  NMR (125 MHz, DMSO- $d_6$ ):  $\delta$  = 142.3, 140.6, 135.9, 135.5, 129.6, 127.3, 125.1, 124.8, 124.2, 123.7, 121.7, 114.7, 114.1, 112.1.

HRMS (ESI)  $m/z$  calcd for  $[\text{M}]^+$   $\text{C}_{16}\text{H}_{10}\text{BrNS}$  326.9717, found 326.9669.

### **5-Bromo-2-(*p*-tolyl)-8*H*-thieno[2,3-*b*]indole (3v)**

Analytical TLC on silica gel, 4:1 *n*-hexane/acetone  $R_f = 0.52$ ; golden solid, mp. 209 °C.

FT-IR (KBr, 4000–400  $\text{cm}^{-1}$ ): 3381, 3011, 2918, 2851, 1526, 1477, 1423, 1281, 811, 791, 688, 574, 446  $\text{cm}^{-1}$ .

$^1\text{H}$  NMR (500 MHz,  $\text{DMSO-}d_6$ ):  $\delta = 11.86$  (s, 1H), 7.99 (d,  $J = 1.5$  Hz, 1H), 7.79 (s, 1H), 7.53 (d,  $J = 8.0$  Hz, 2H), 7.45 (d,  $J = 9.0$  Hz, 1H), 7.30 (dd,  $J = 9.0, 1.5$  Hz, 1H), 7.23 (d,  $J = 8.0$  Hz, 2H), 2.32 (s, 3H).

$^{13}\text{C}$  NMR (125 MHz,  $\text{DMSO-}d_6$ ):  $\delta = 141.5, 140.0, 136.2, 135.6, 132.2, 129.7, 124.6, 124.2, 123.7, 123.2, 121.2, 113.6, 113.5, 111.5, 20.7$ .

HRMS (ESI)  $m/z$  calcd for  $[\text{M}]^+ \text{C}_{17}\text{H}_{12}\text{BrNS}$  340.9874, found 340.9827.

### **5-Bromo-2-(4-methoxyphenyl)-8*H*-thieno[2,3-*b*]indole (3w)**

Analytical TLC on silica gel, 4:1 *n*-hexane/acetone  $R_f = 0.47$ ; golden solid, mp. 219 °C.

FT-IR (KBr, 4000–400  $\text{cm}^{-1}$ ): 3411, 3051, 2956, 2838, 1605, 1526, 1470, 1421, 1296, 1254, 1179, 1031, 819, 804, 573, 511  $\text{cm}^{-1}$ .

$^1\text{H}$  NMR (500 MHz,  $\text{DMSO-}d_6$ ):  $\delta = 11.84$  (s, 1H), 7.98 (d,  $J = 2.0$  Hz, 1H), 7.70 (s, 1H), 7.56 (d,  $J = 8.5$  Hz, 2H), 7.45 (d,  $J = 8.5$  Hz, 1H), 7.30 (dd,  $J = 8.5, 2.0$  Hz, 1H), 6.99 (d,  $J = 8.5$  Hz, 2H), 3.78 (s, 3H).

$^{13}\text{C}$  NMR (125 MHz,  $\text{DMSO-}d_6$ ):  $\delta = 158.4, 141.2, 140.0, 135.6, 127.6, 126.1, 124.1, 123.7, 123.1, 121.1, 114.6, 113.6, 112.8, 111.4, 55.2$ .

HRMS (ESI)  $m/z$  calcd for  $[\text{M}]^+ \text{C}_{17}\text{H}_{12}\text{BrNOS}$  358.9803, found 358.9804.

### **5-Bromo-2-(4-fluorophenyl)-8*H*-thieno[2,3-*b*]indole (3x)**

Analytical TLC on silica gel, 4:1 *n*-hexane/acetone  $R_f = 0.47$ ; golden solid, mp. 178 °C.

FT-IR (KBr, 4000–400  $\text{cm}^{-1}$ ): 3417, 3078, 2922, 1602, 1562, 1529, 1482, 1452, 1236, 1159, 1098, 915, 816, 792, 687  $\text{cm}^{-1}$ .

$^1\text{H}$  NMR (500 MHz,  $\text{DMSO-}d_6$ ):  $\delta = 11.88$  (s, 1H), 7.99 (d,  $J = 1.5$  Hz, 1H), 7.81 (s, 1H), 7.67 (dd,  $J = 8.5, 5.5$  Hz, 2H), 7.46 (d,  $J = 8.5$  Hz, 1H), 7.35–7.29 (m, 1H), 7.26 (m, 2H).

$^{13}\text{C}$  NMR (125 MHz,  $\text{DMSO-}d_6$ ):  $\delta$  = 161.2 (d,  $J$  = 242.8 Hz), 141.8 (s), 140.1 (s), 134.2 (s), 131.6 (d,  $J$  = 3.1 Hz), 126.6 (d,  $J$  = 8.0 Hz), 124.3 (s), 123.7 (s), 123.1 (s), 121.2 (s), 116.0 (d,  $J$  = 21.6 Hz), 114.3 (s), 113.6 (s), 111.6 (s).

HRMS (ESI)  $m/z$  calcd for  $[\text{M}]^+$   $\text{C}_{16}\text{H}_9\text{BrFNS}$  344.9623, found 344.9577.

### **5-Nitro-2-phenyl-8*H*-thieno[2,3-*b*]indole (3y)**

Analytical TLC on silica gel, 4:1 *n*-hexane/acetone  $R_f$  = 0.37; brown solid, mp. 250–251°C.

FT-IR (KBr, 4000–400  $\text{cm}^{-1}$ ): 3436, 3050, 2920, 1610, 1521, 1500, 1318, 1297, 1253, 1120, 1059, 925, 850, 819, 732, 677  $\text{cm}^{-1}$ .

$^1\text{H}$  NMR (500 MHz, acetone- $d_6$ ):  $\delta$  = 11.46 (s, 1H), 8.82 (d,  $J$  = 2.0 Hz, 1H), 8.15 (dd,  $J$  = 9.0, 2.0 Hz, 1H), 7.98 (s, 1H), 7.71 (m, 3H), 7.44 (t,  $J$  = 8.0 Hz, 2H), 7.30 (t,  $J$  = 7.5 Hz, 1H).

$^{13}\text{C}$  NMR (125 MHz, acetone- $d_6$ ):  $\delta$  = 145.8, 144.5, 142.4, 139.0, 136.2, 130.1, 128.2, 127.1, 126.1, 122.4, 118.5, 116.6, 114.9, 112.8.

HRMS (ESI)  $m/z$  calcd for  $[\text{M}]^+$   $\text{C}_{16}\text{H}_{10}\text{N}_2\text{O}_2\text{S}$  294.0463, found 294.0418.

Section S6. Copies of  $^1\text{H}$ ,  $^{13}\text{C}$  NMR and HRMS spectra of all products

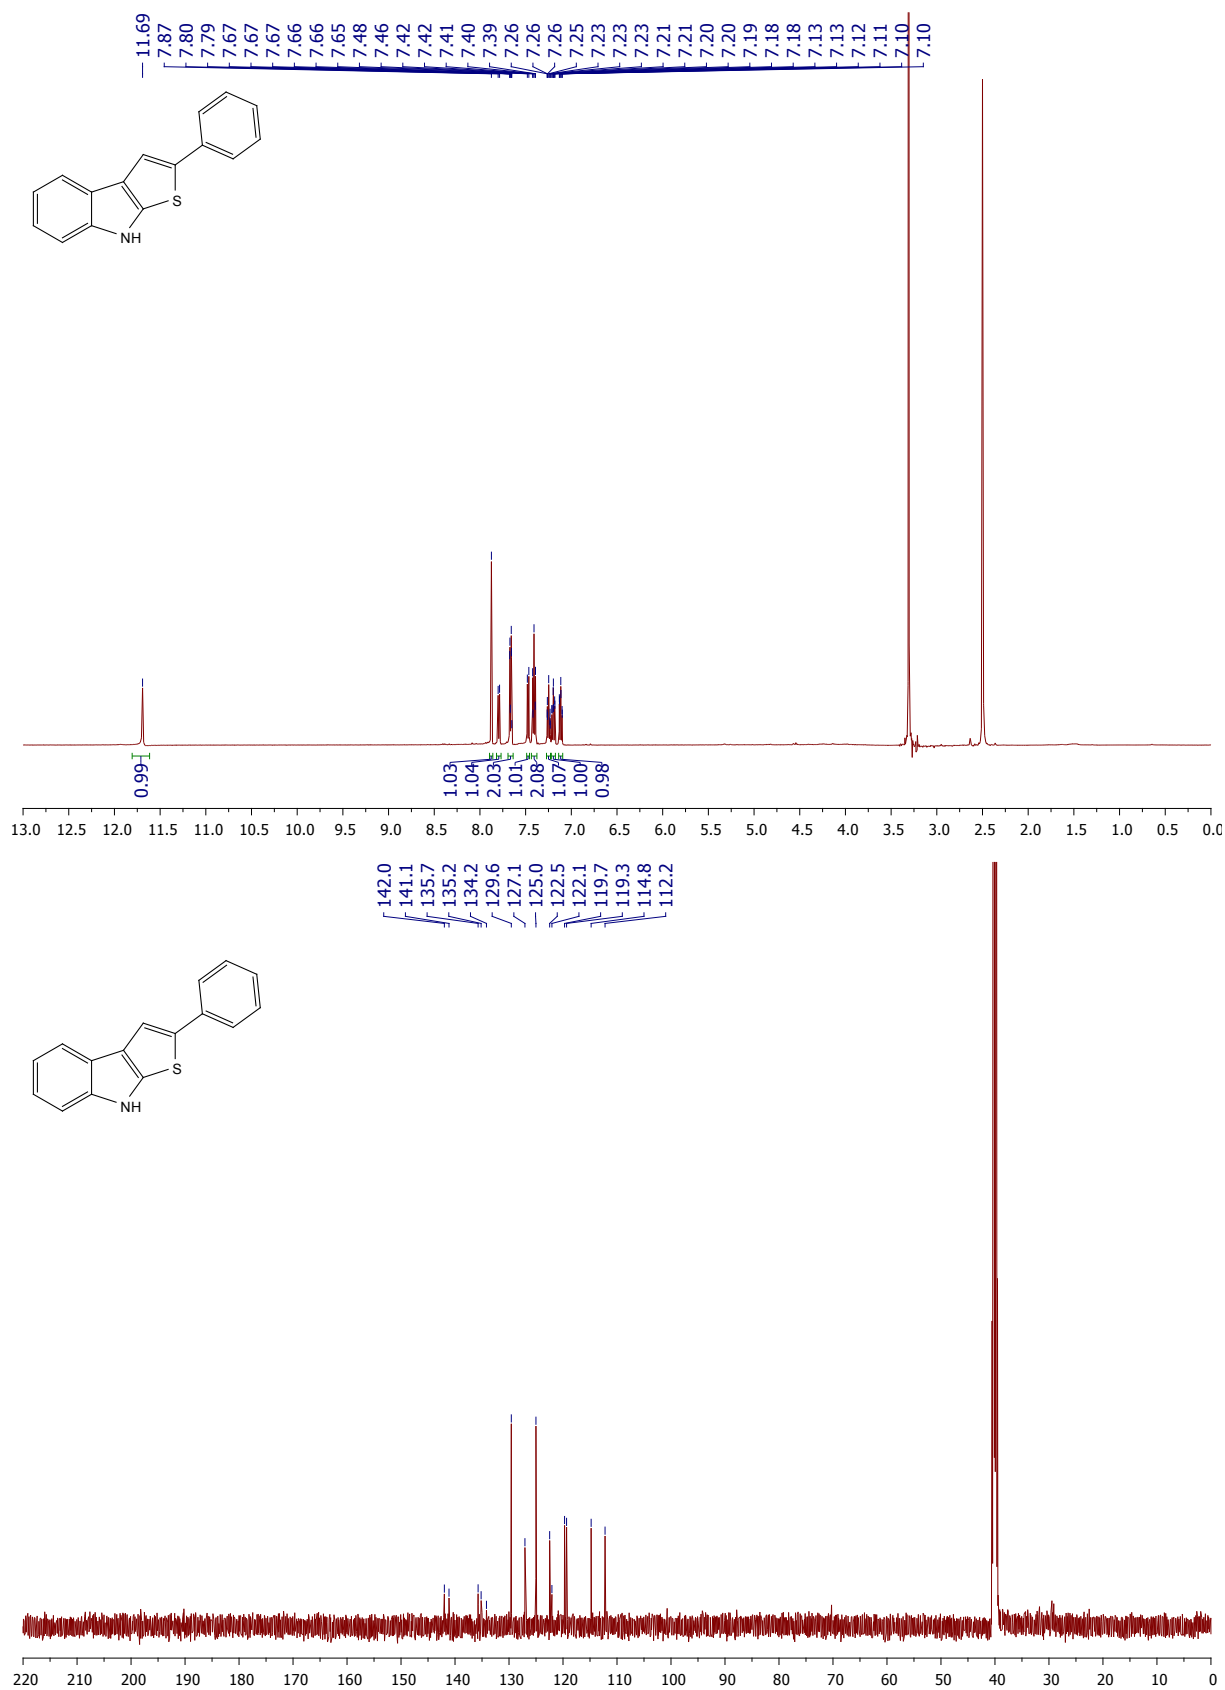

Figure S9.  $^1\text{H}$  (top) and  $^{13}\text{C}$  (bottom) NMR spectra of 2-phenyl-8H-thieno[2,3-b]indole

3a



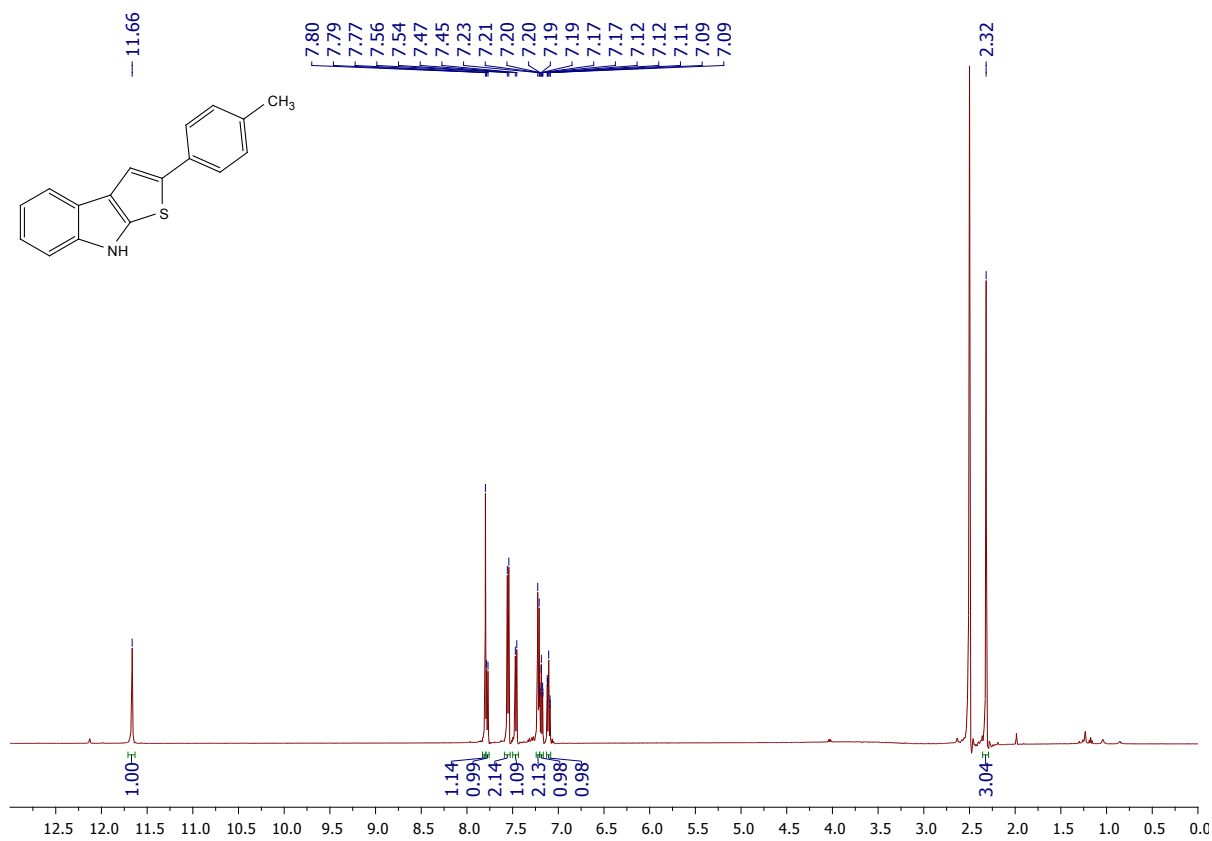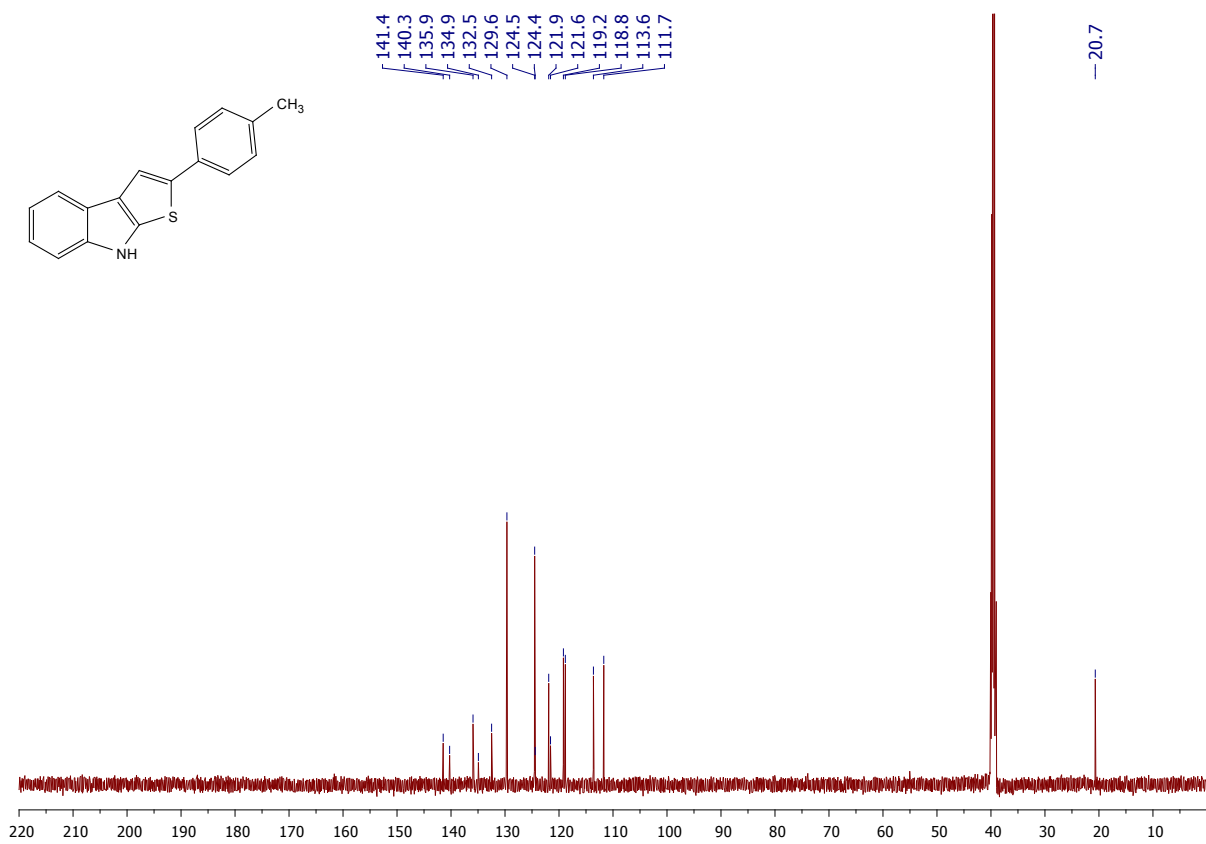

Figure S10.  $^1\text{H}$  (top) and  $^{13}\text{C}$  (bottom) NMR spectra of 2-(*p*-tolyl)-8*H*-thieno[2,3-*b*]indole 3b

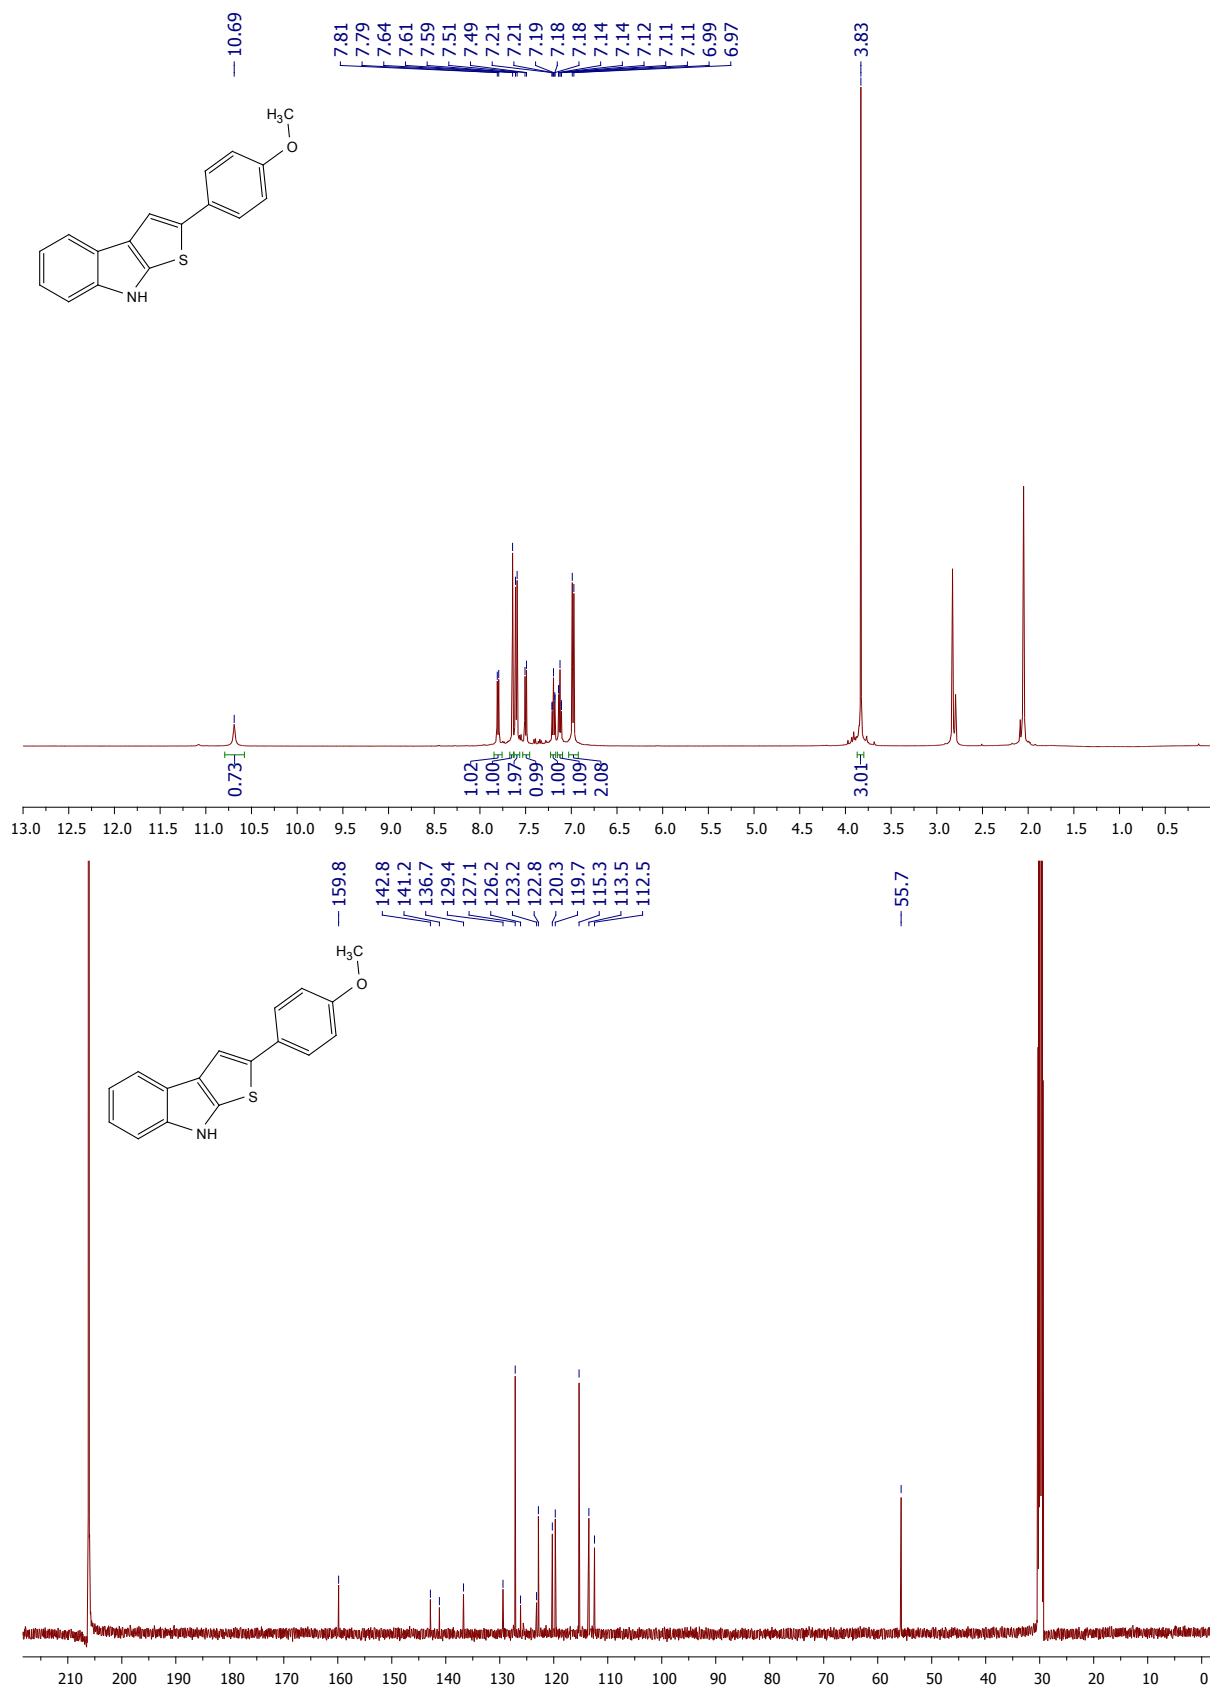

**Figure S11. <sup>1</sup>H (top) and <sup>13</sup>C (bottom) NMR spectra of 2-(4-methoxyphenyl)-8*H*-thieno[2,3-*b*]indole 3c**

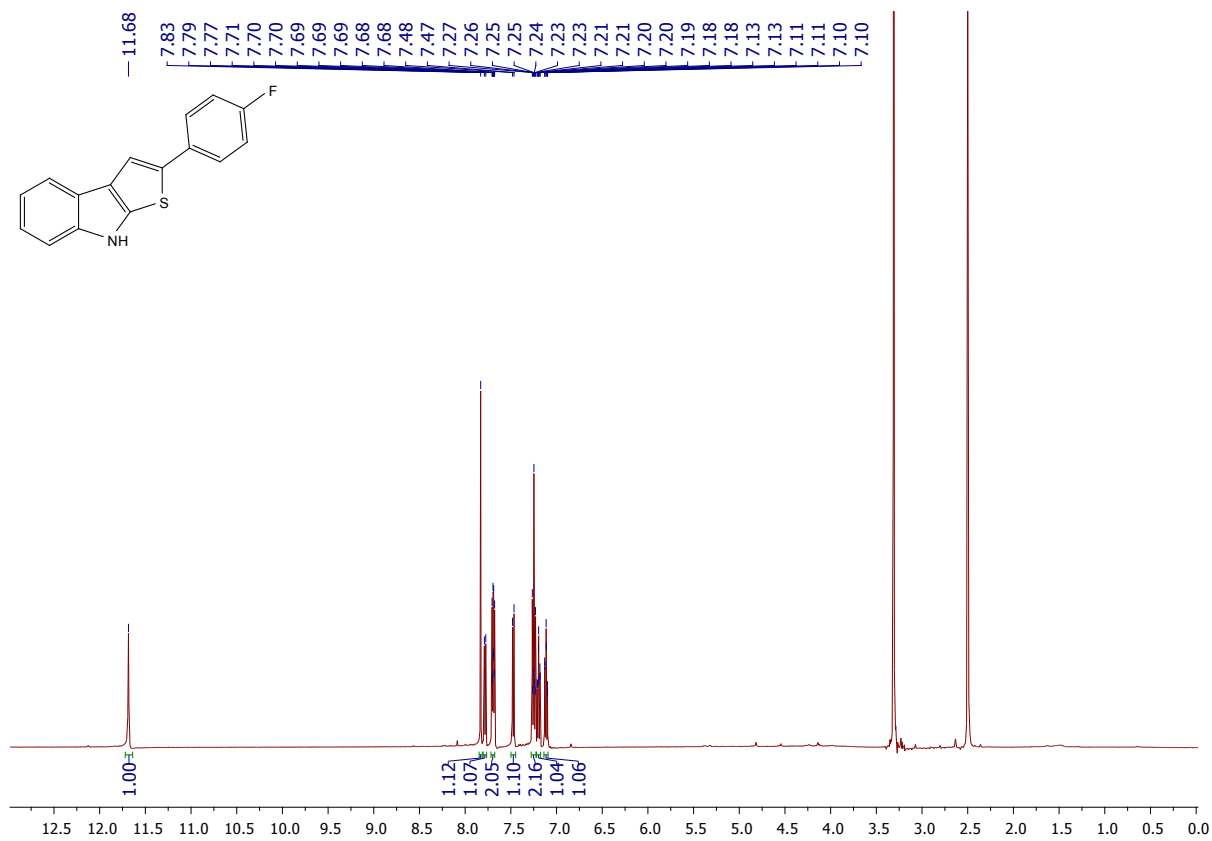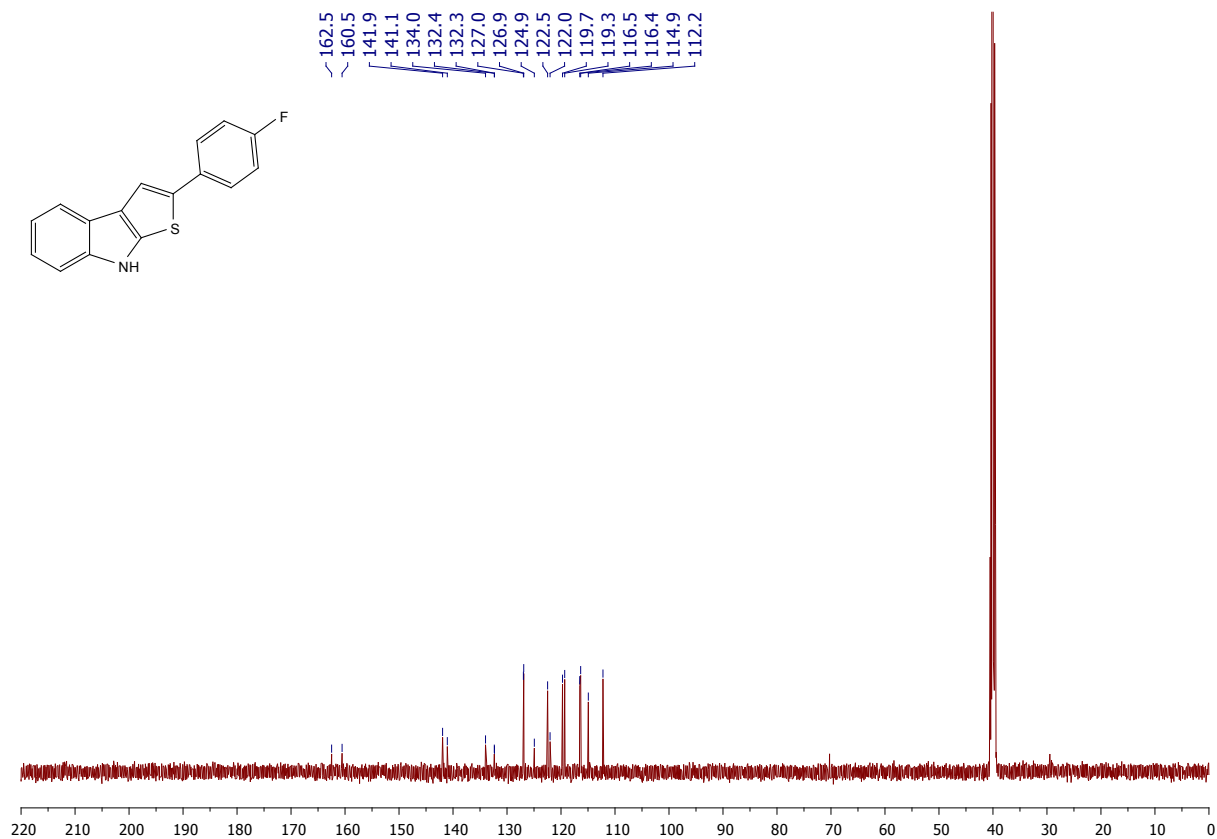

**Figure S12. <sup>1</sup>H (top) and <sup>13</sup>C (bottom) NMR spectra of 2-(4-fluorophenyl)-8H-thieno[2,3-b]indole 3d**

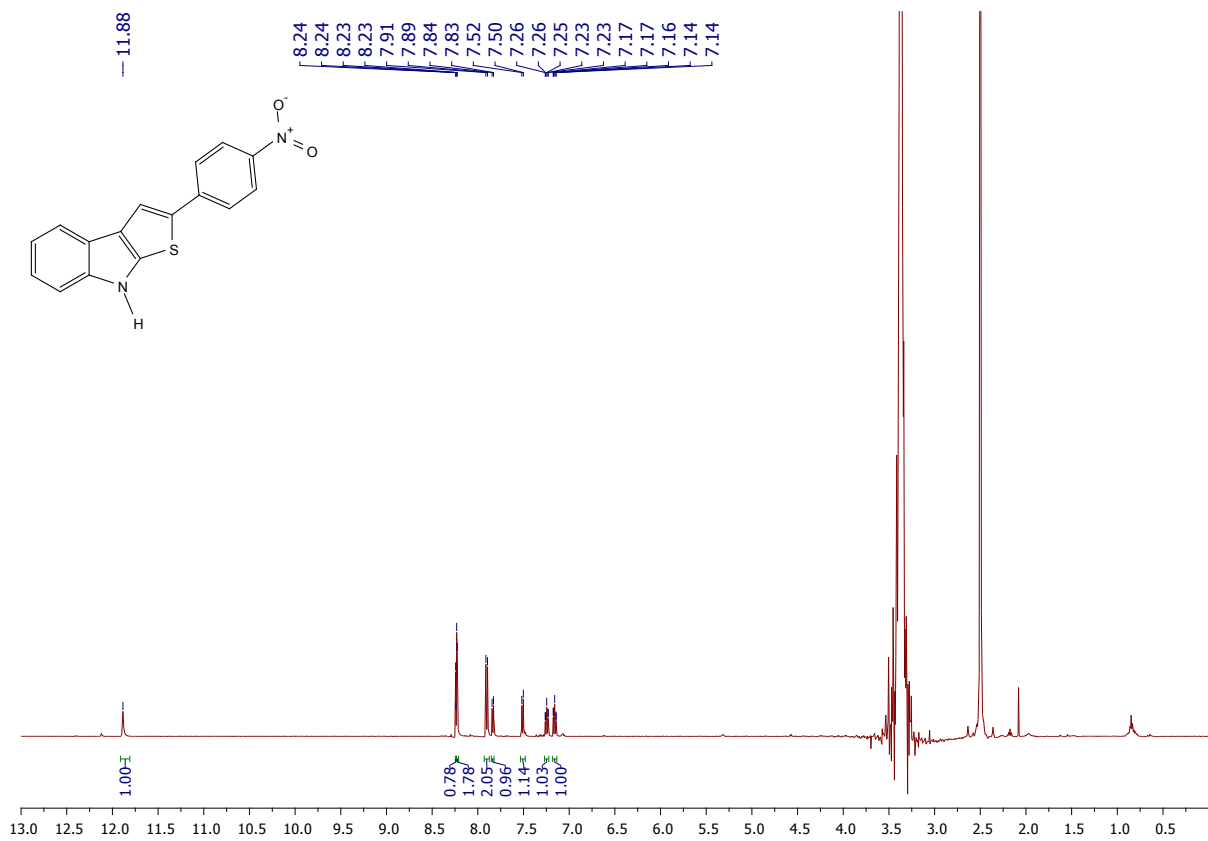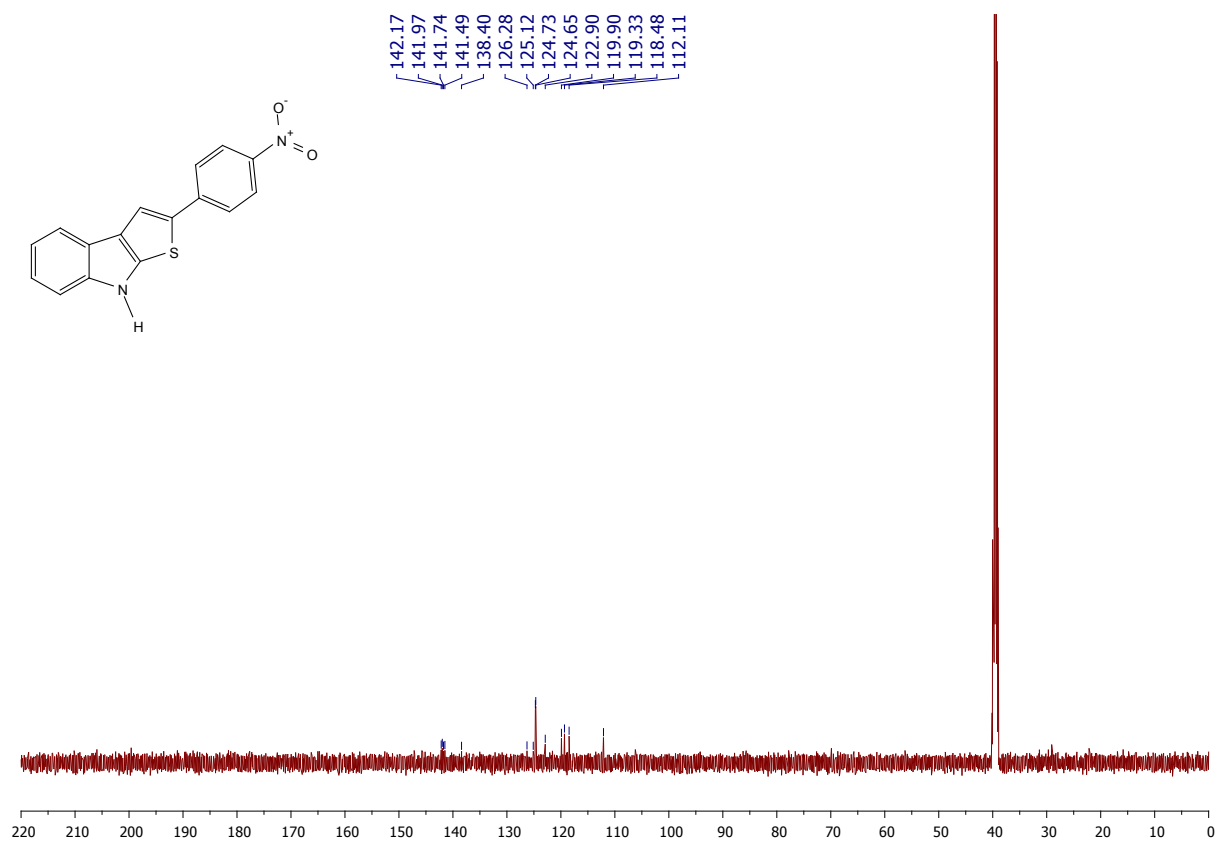

<sup>1</sup>H (top) and <sup>13</sup>C (bottom) NMR spectra of 2-(4-nitrophenyl)-8H-thieno[2,3-b]indole 3e

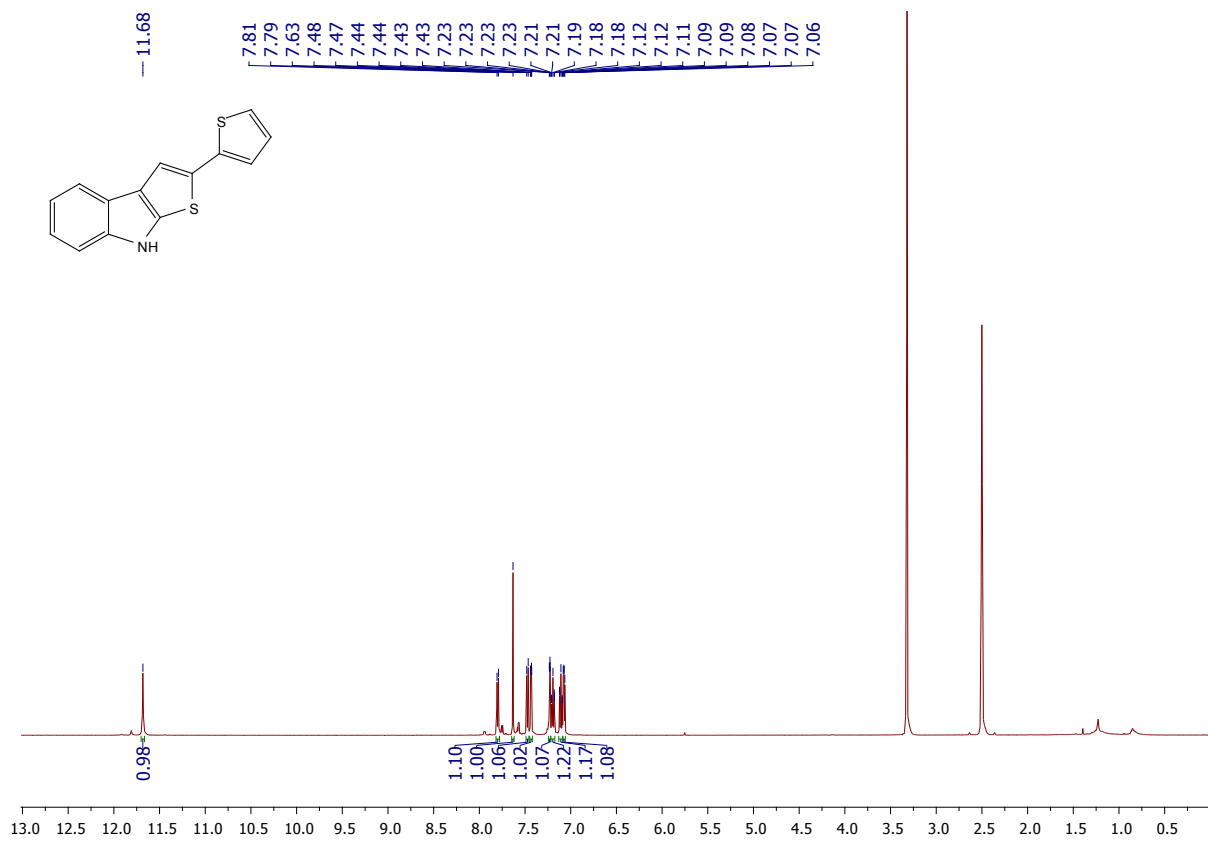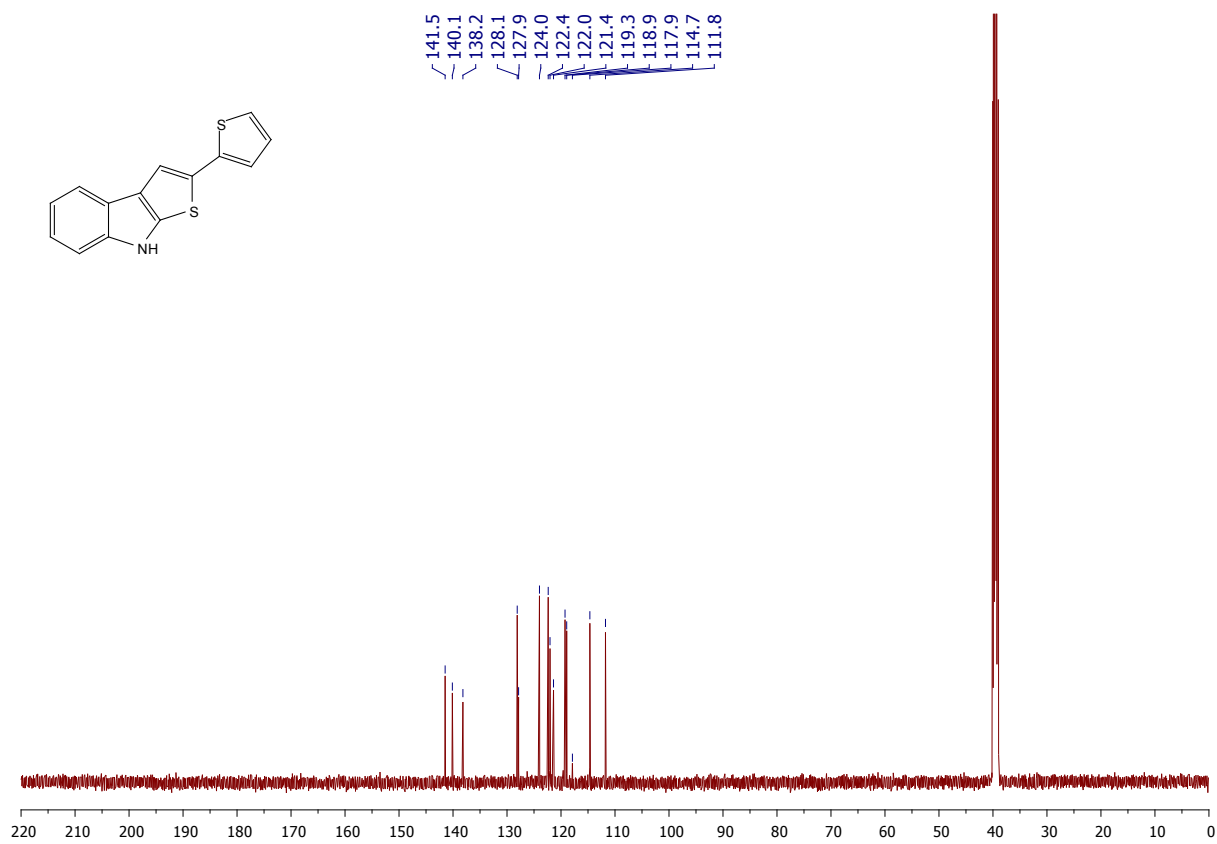

Figure S13. <sup>1</sup>H (top) and <sup>13</sup>C (bottom) NMR spectra of 2-(thiophen-2-yl)-8H-thieno[2,3-b]indole 3f

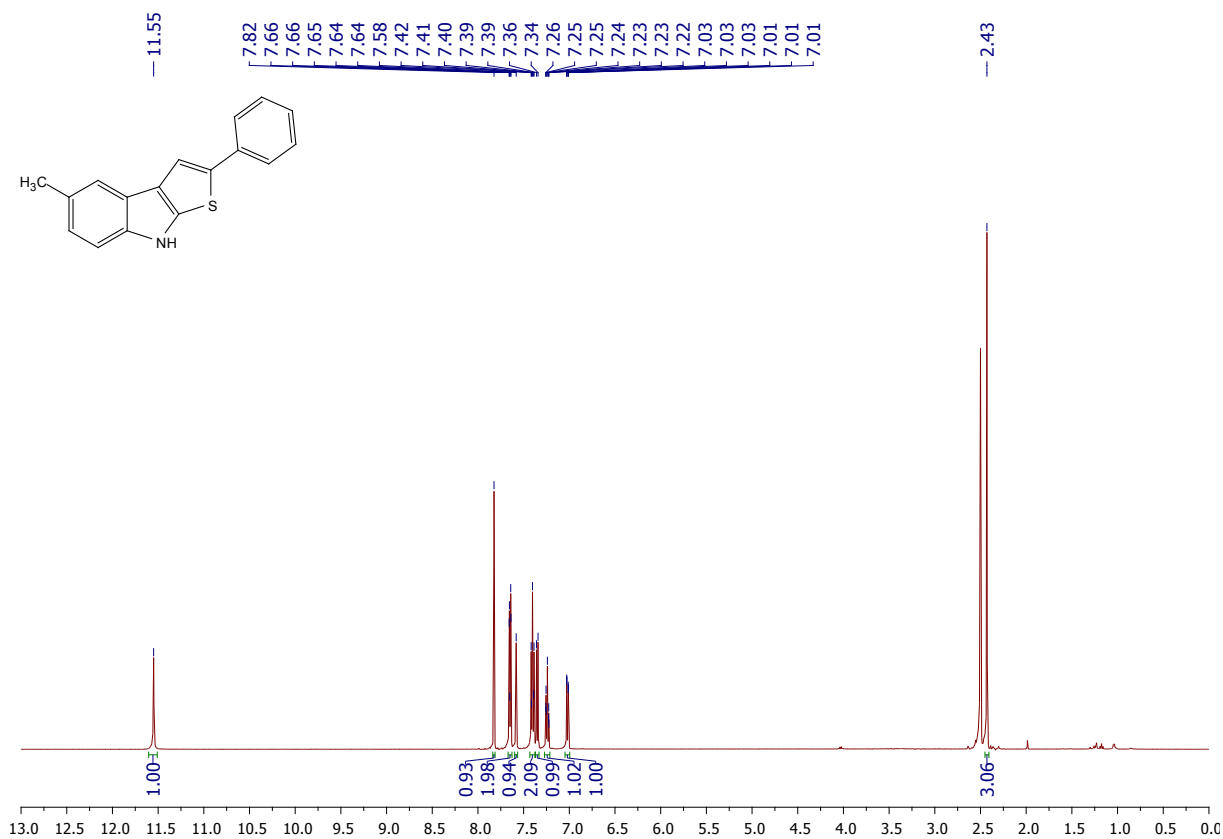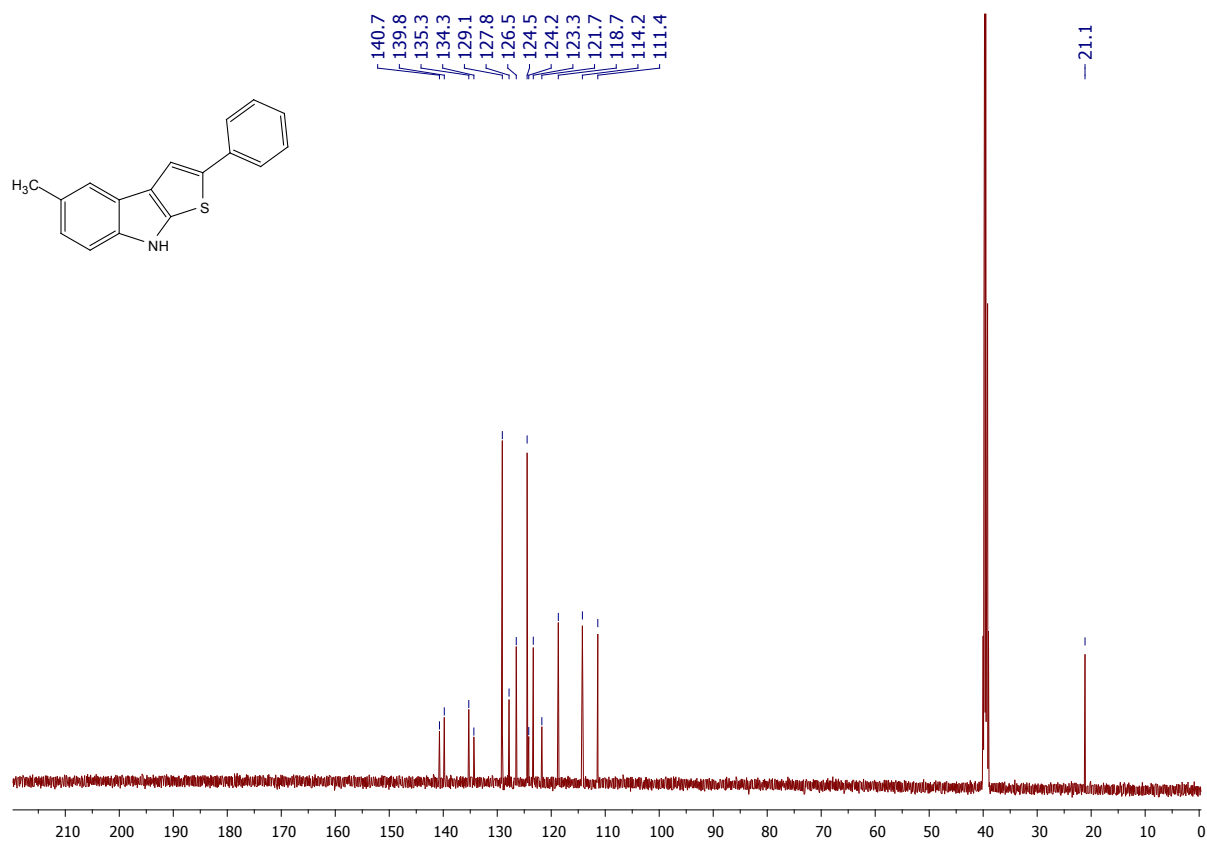

Figure S14. <sup>1</sup>H (top) and <sup>13</sup>C (bottom) NMR spectra of 5-methyl-2-phenyl-8H-thieno[2,3-b]indole 3g

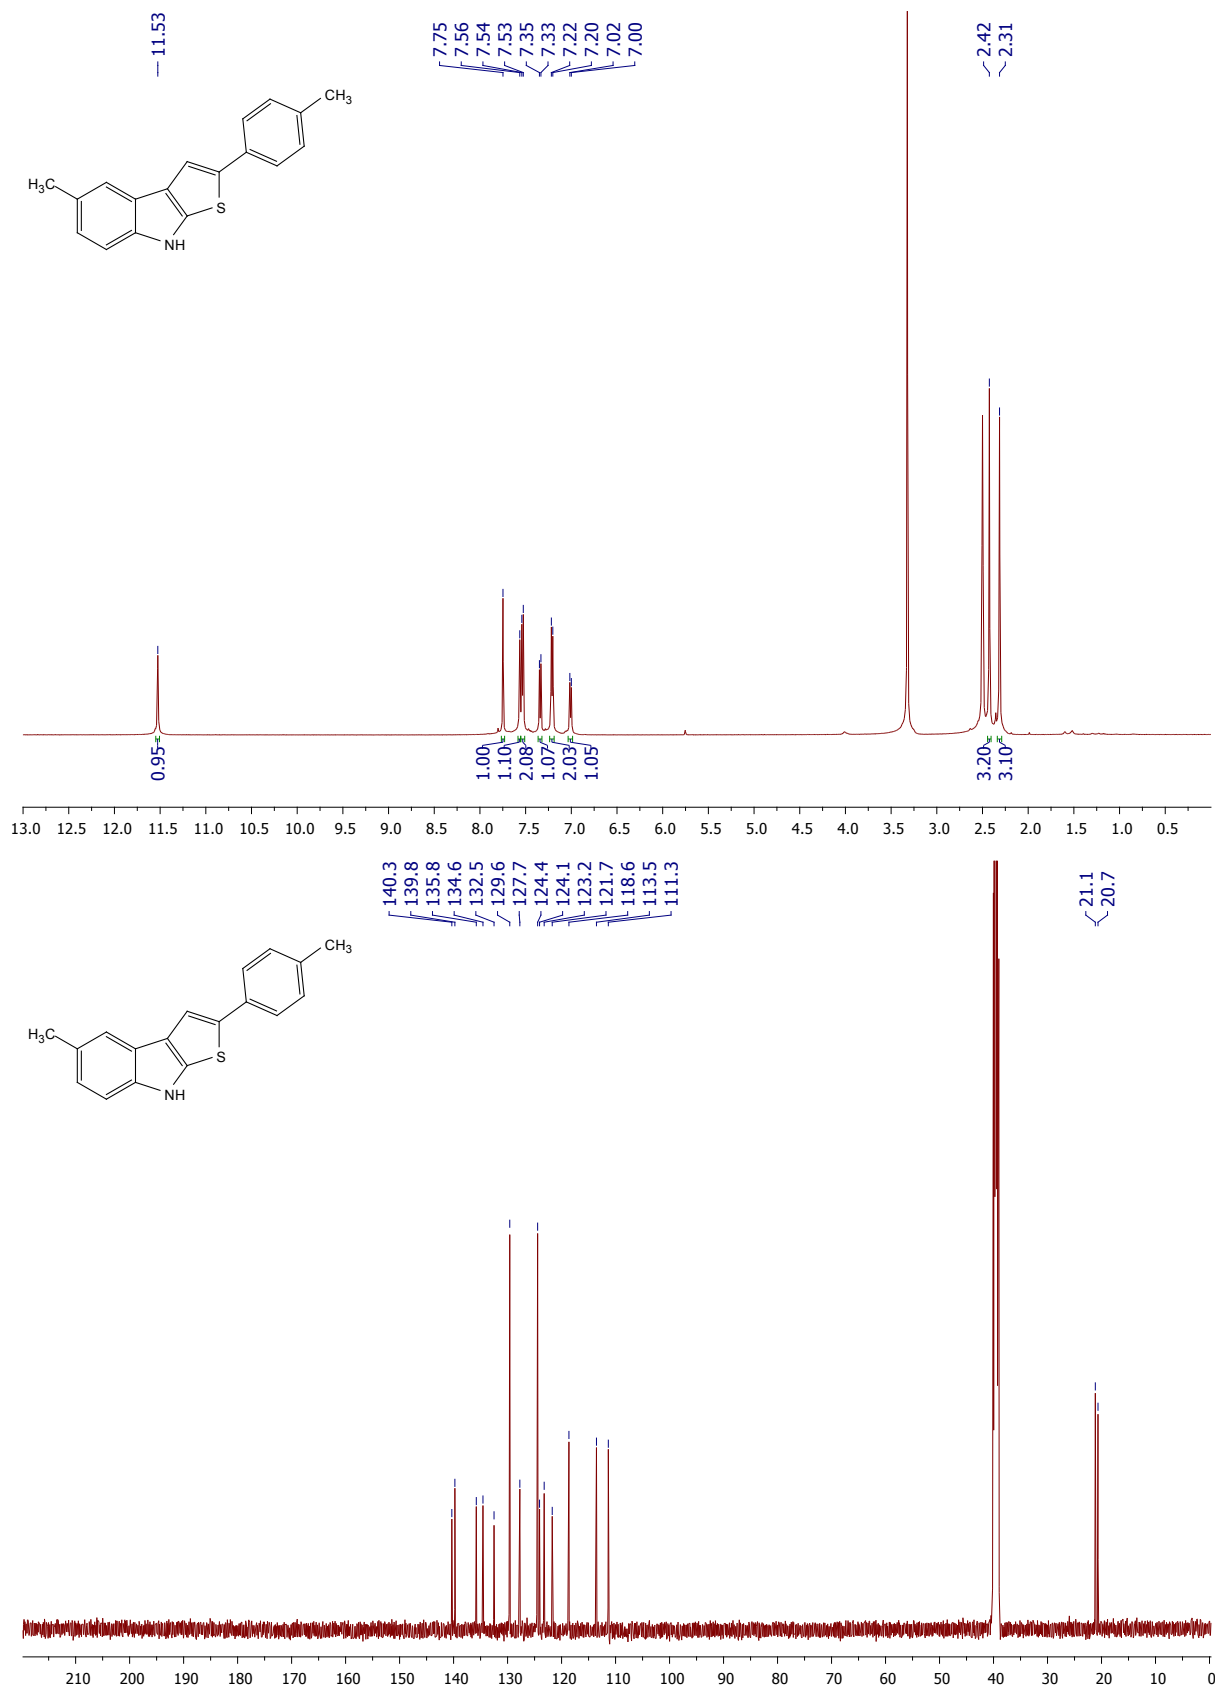

**Figure S15. <sup>1</sup>H (top) and <sup>13</sup>C (bottom) NMR spectra of 5-methyl-2-(p-tolyl)-8H-thieno[2,3-b]indole 3h**

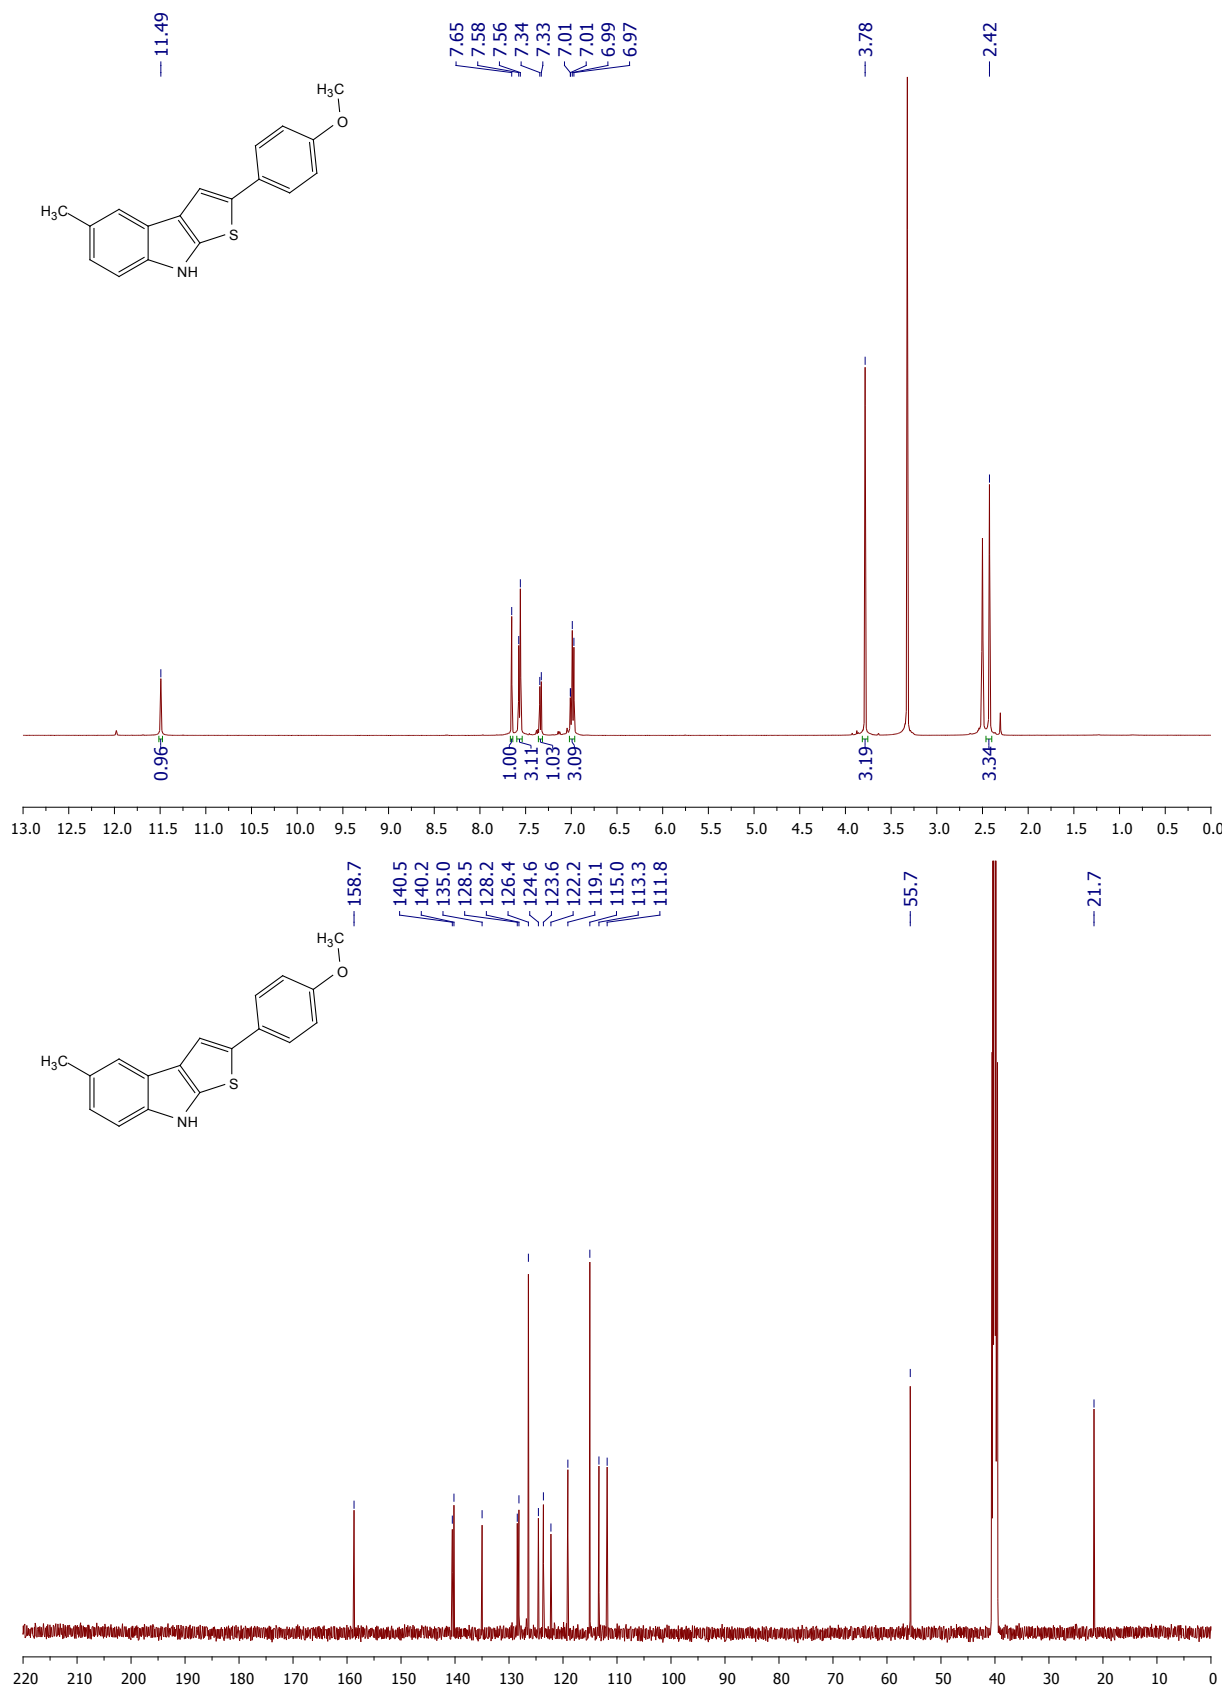

**Figure S16. <sup>1</sup>H (top) and <sup>13</sup>C (bottom) NMR spectra of 2-(4-methoxyphenyl)-5-methyl-8*H*-thieno[2,3-*b*]indole 3i**



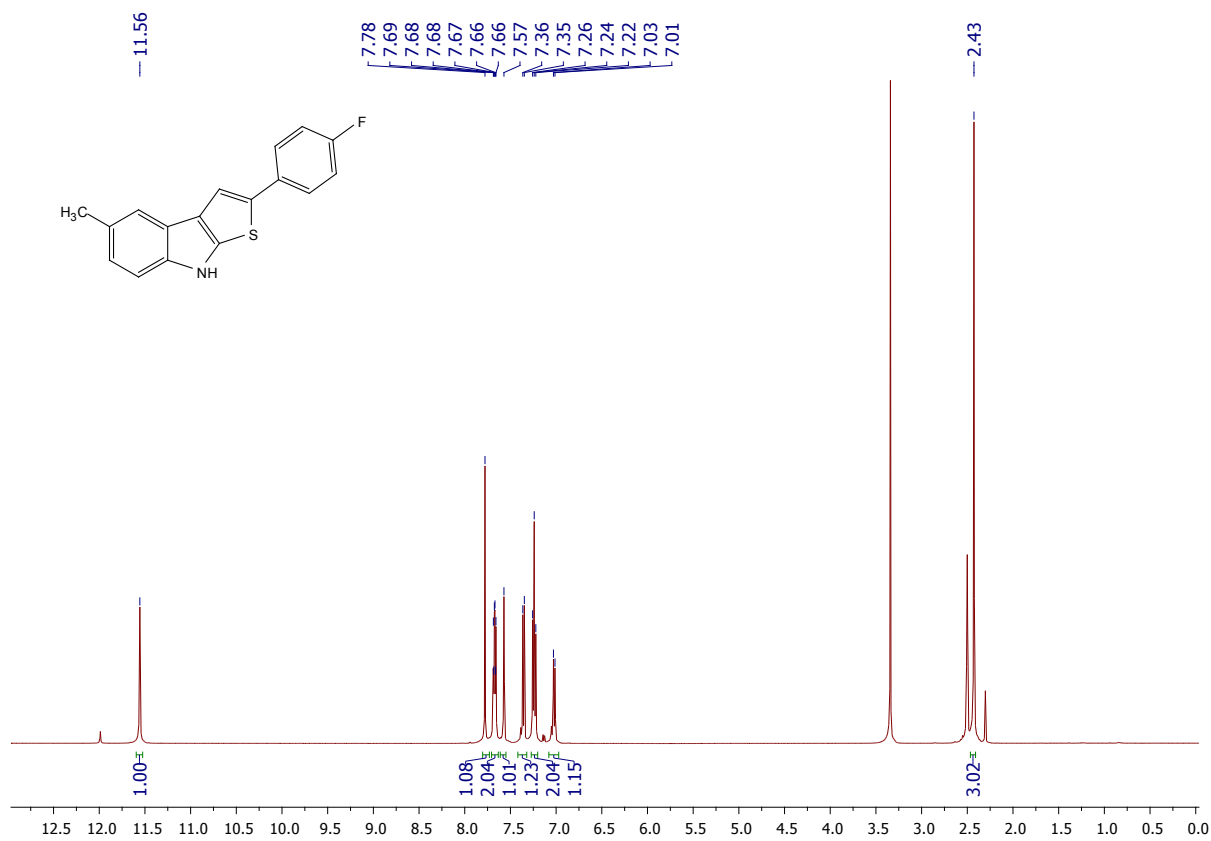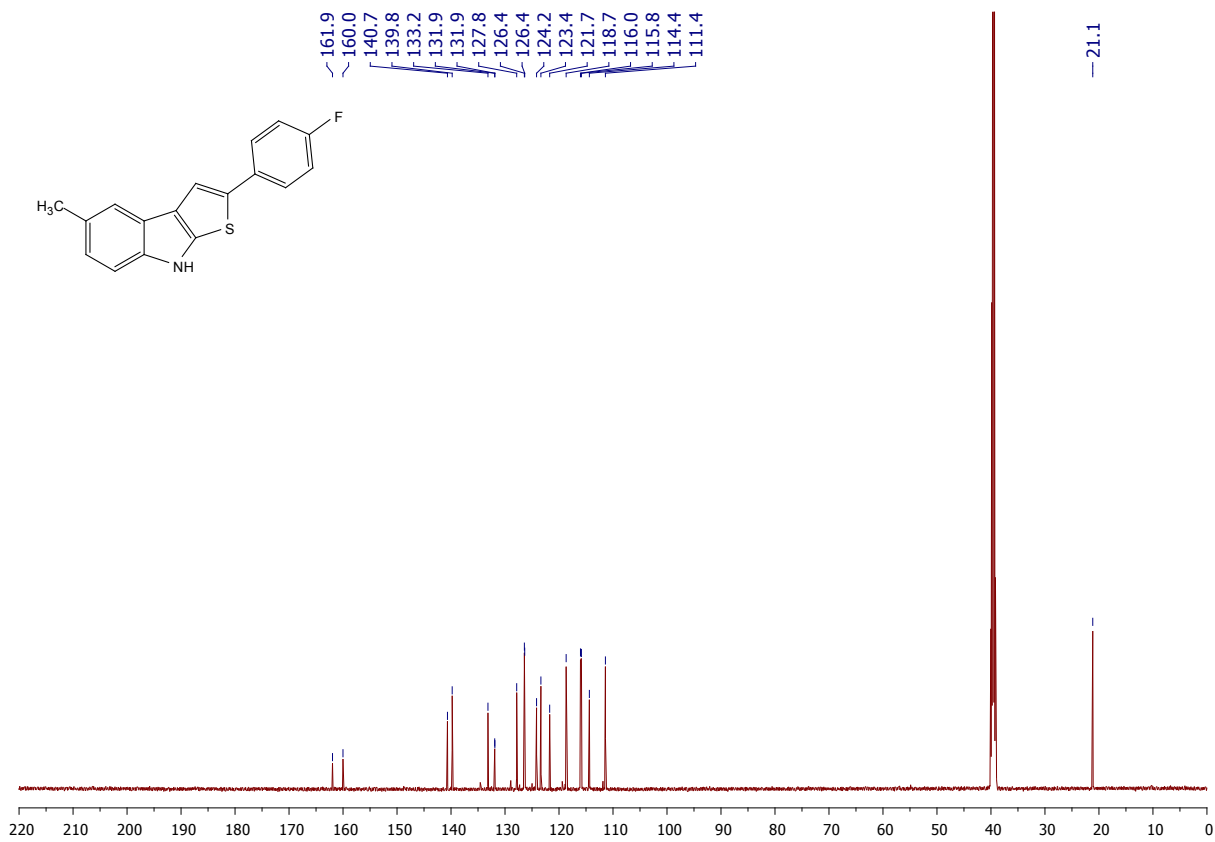

**Figure S17. <sup>1</sup>H (top) and <sup>13</sup>C (bottom) NMR spectra of 2-(4-fluorophenyl)-5-methyl-8H-thieno[2,3-b]indole 3j**

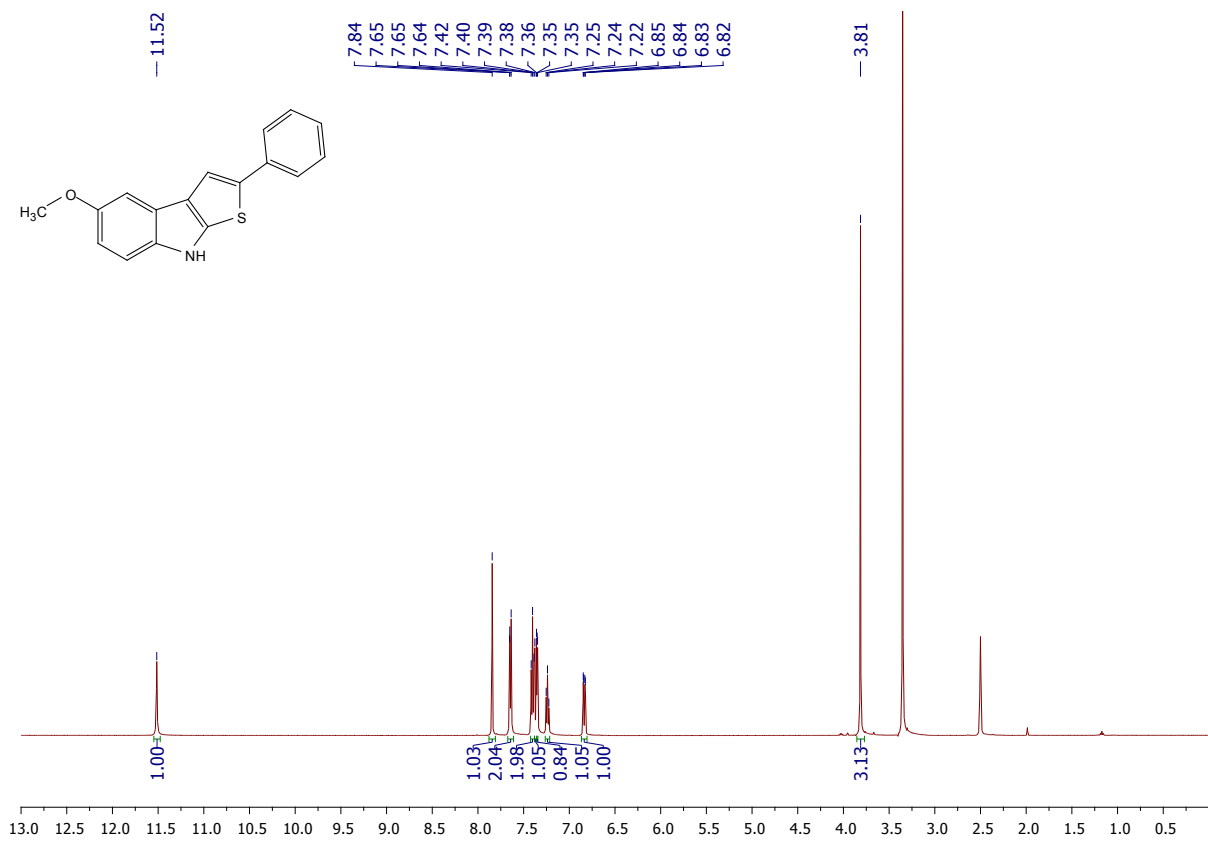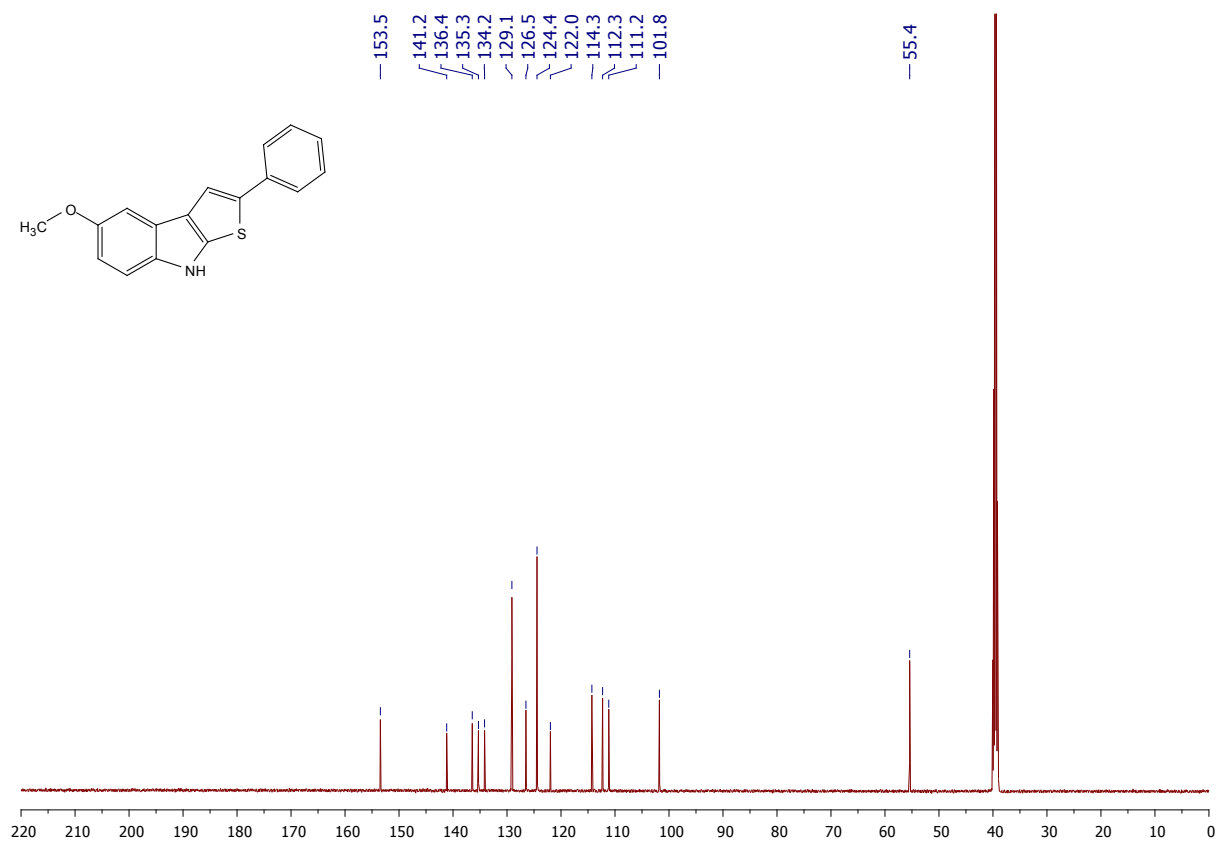

Figure S18.  $^1\text{H}$  (top) and  $^{13}\text{C}$  (bottom) NMR spectra of 5-methoxy-2-phenyl-8*H*-thieno[2,3-*b*]indole 3k

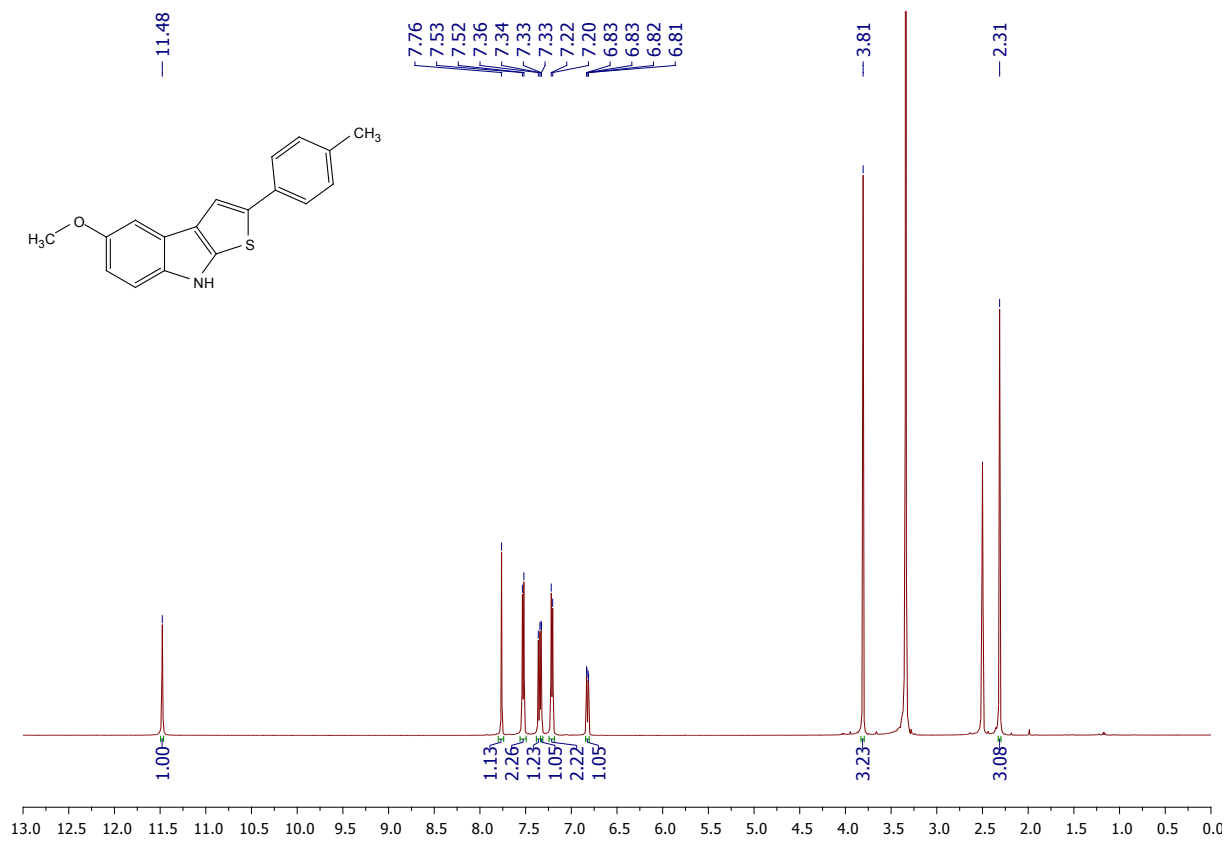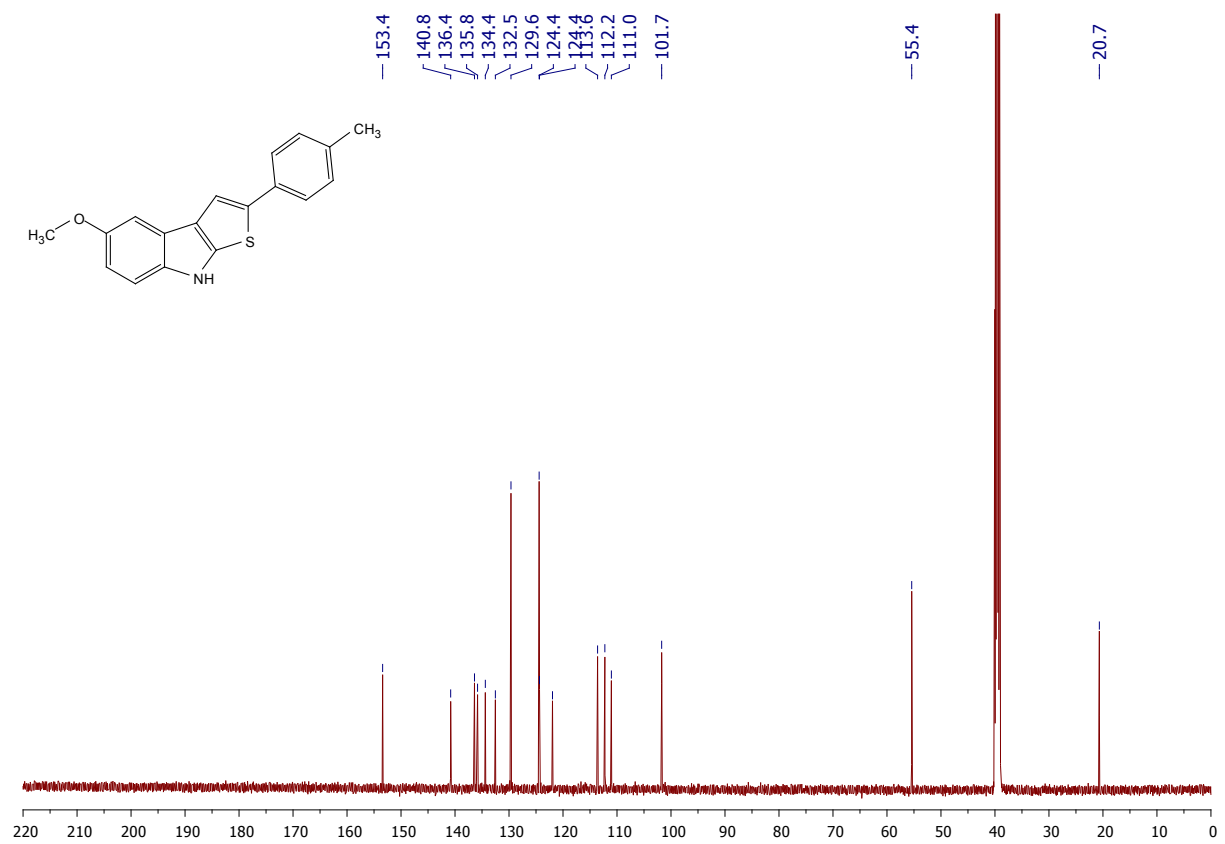

Figure S19. <sup>1</sup>H (top) and <sup>13</sup>C (bottom) NMR spectra of 5-methoxy-2-(*p*-tolyl)-8*H*-thieno[2,3-*b*]indole 3I

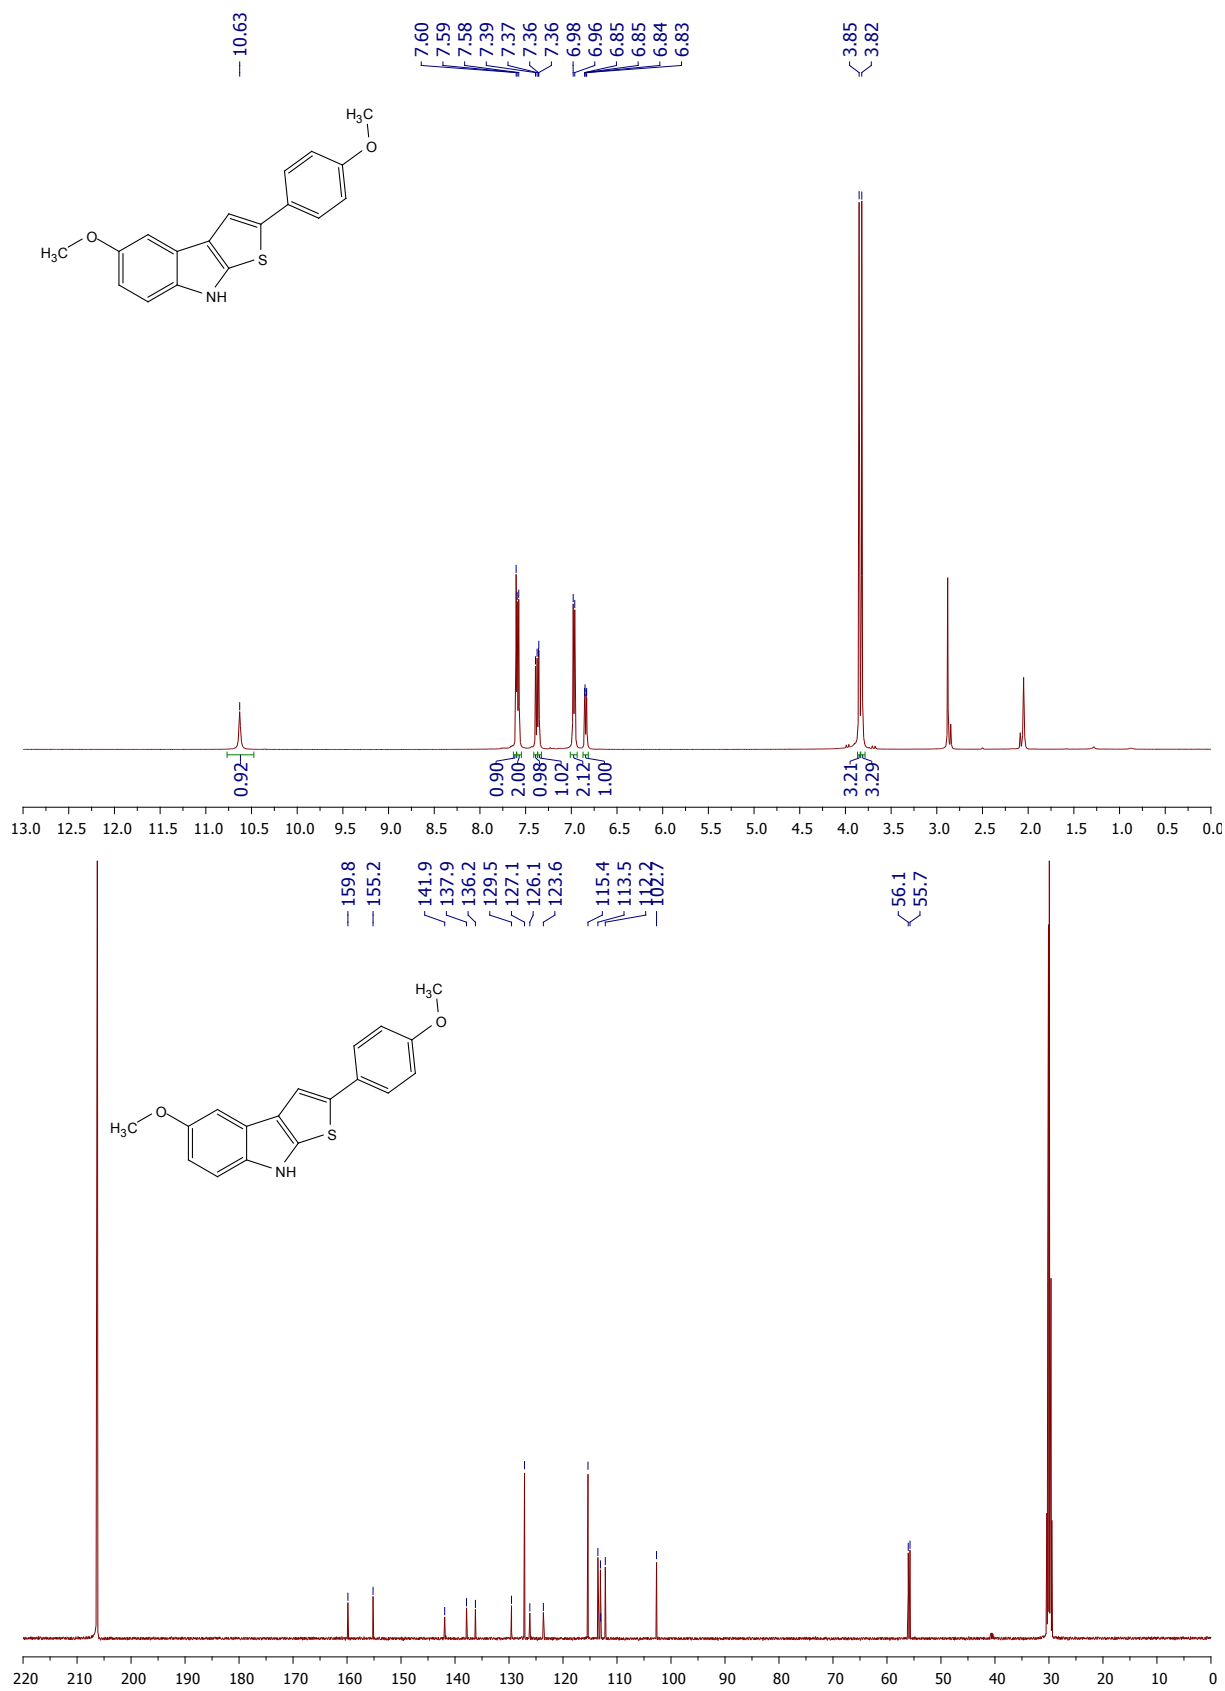

**Figure S20. <sup>1</sup>H (top) and <sup>13</sup>C (bottom) NMR spectra of 5-methoxy-2-(4-methoxyphenyl)-8H-thieno[2,3-b]indole 3m**

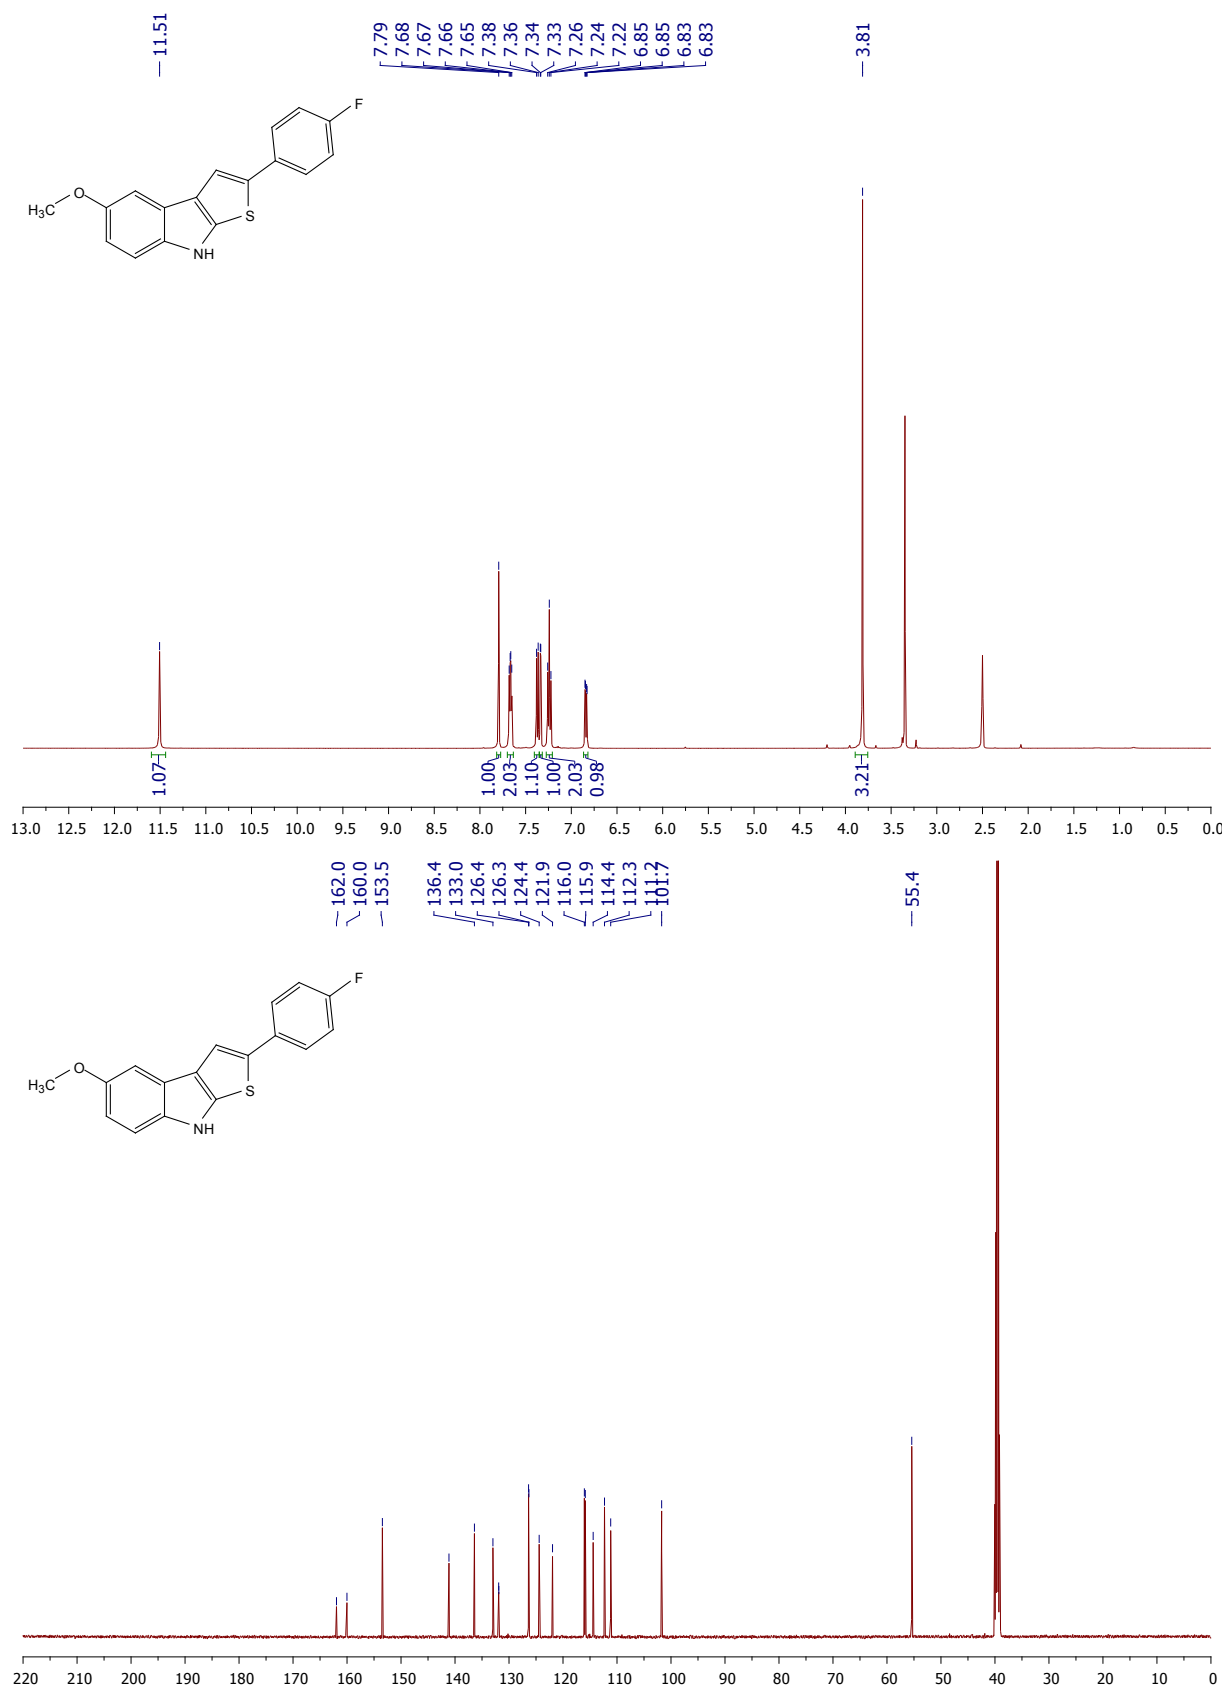

**Figure S21.** <sup>1</sup>H (top) and <sup>13</sup>C (bottom) NMR spectra of 5-methoxy-2-(4-fluorophenyl)-8H-thieno[2,3-b]indole 3n

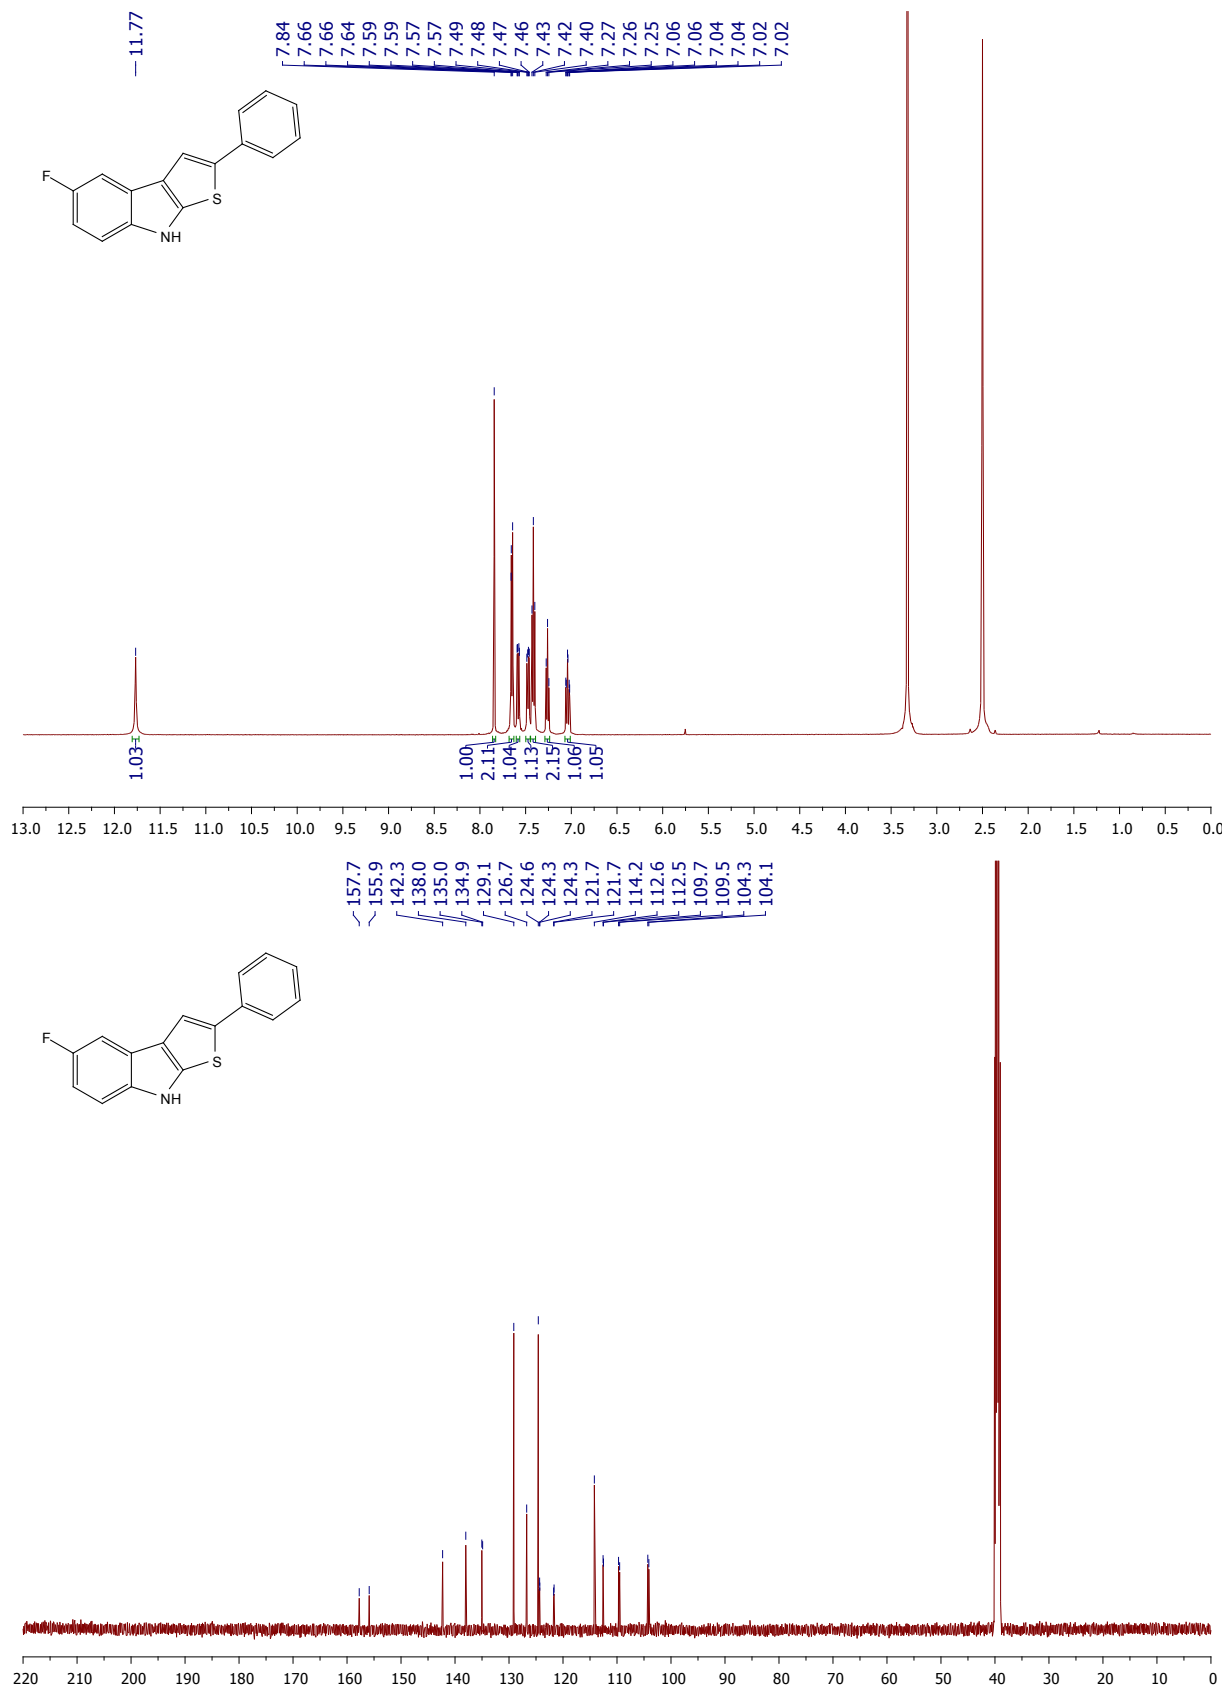

**Figure S22. <sup>1</sup>H (top) and <sup>13</sup>C (bottom) NMR spectra of 5-fluoro-2-phenyl-8H-thieno[2,3-b]indole 3o**

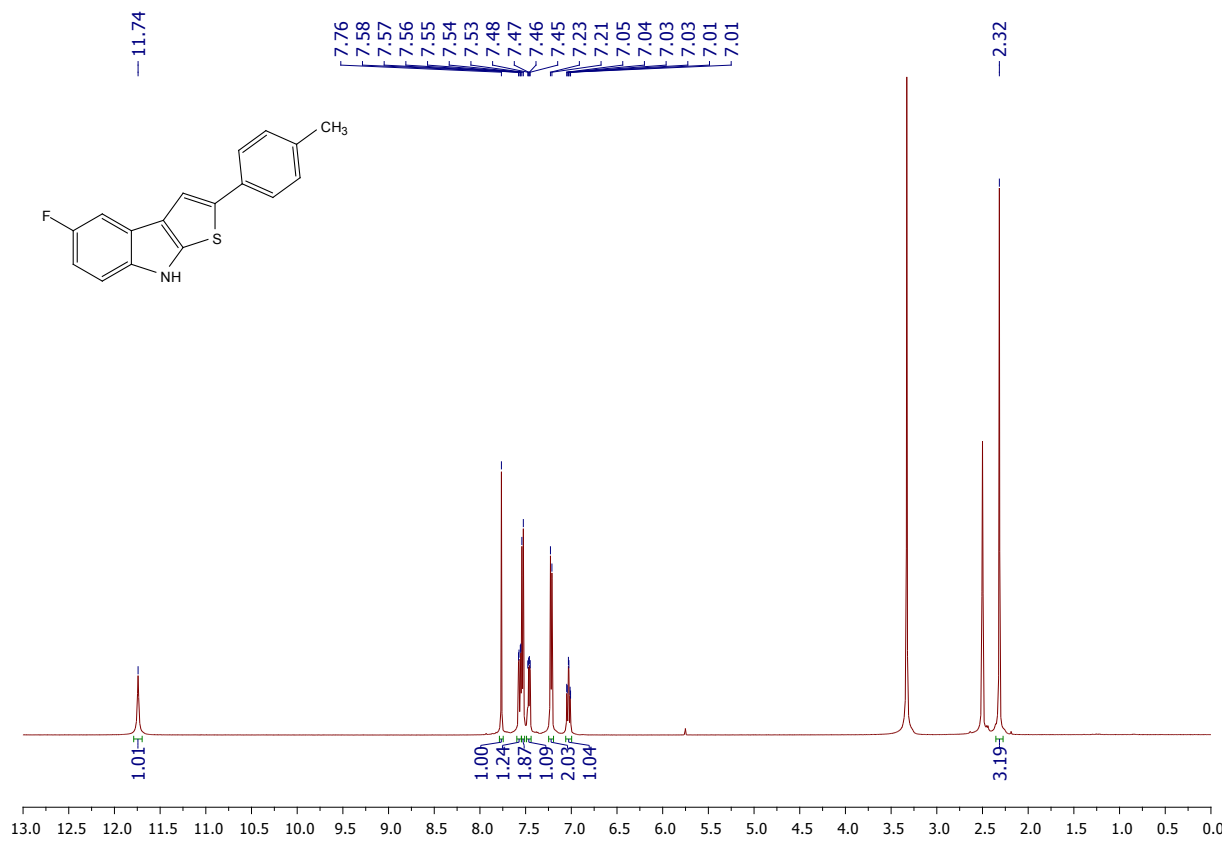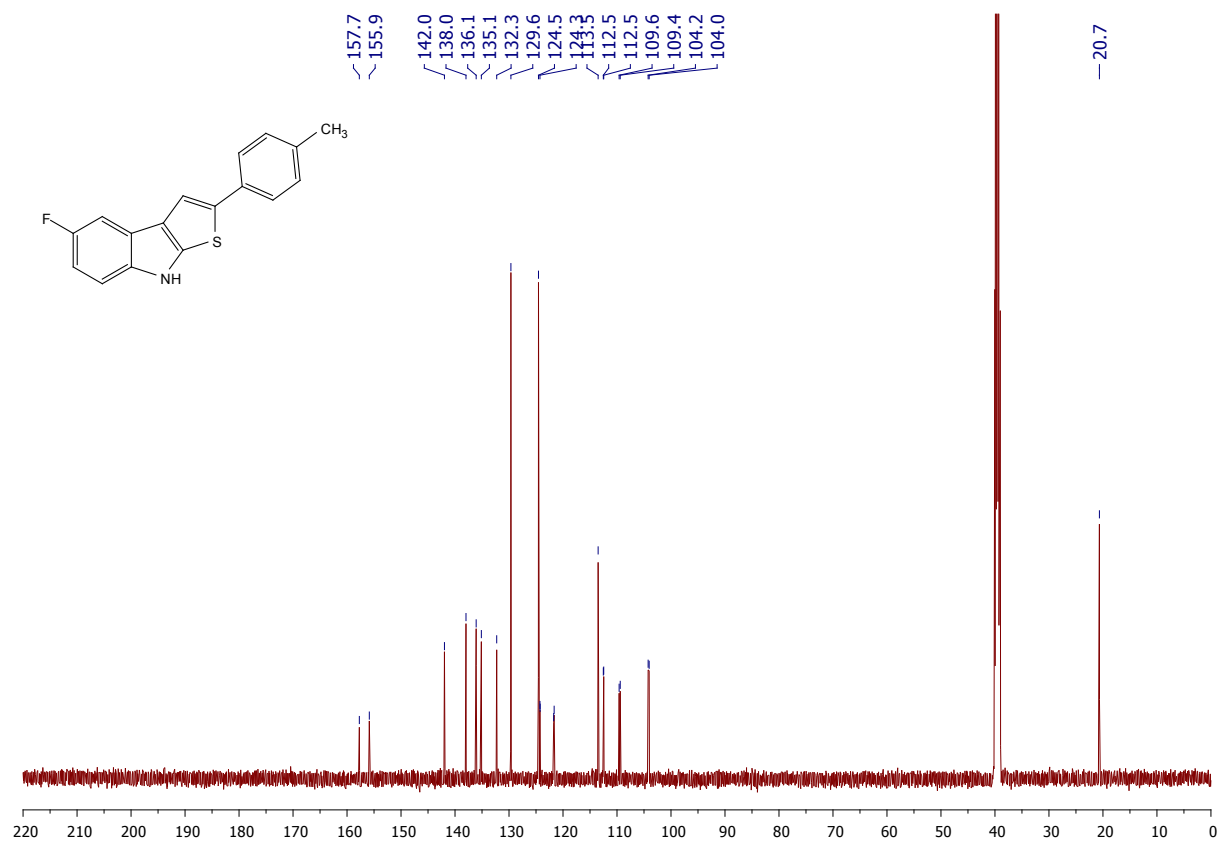

Figure S23. <sup>1</sup>H (top) and <sup>13</sup>C (bottom) NMR spectra of 5-fluoro-2-(*p*-tolyl)-8*H*-thieno[2,3-*b*]indole 3p

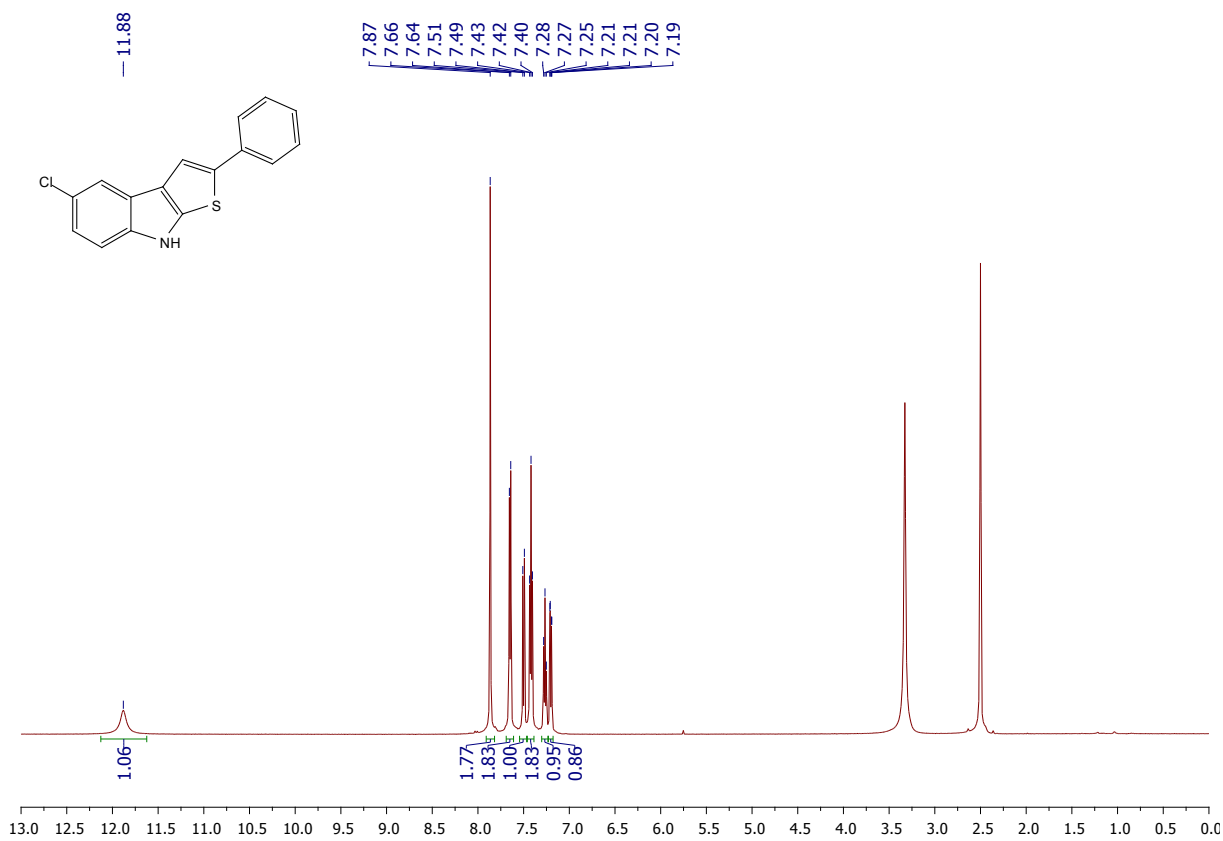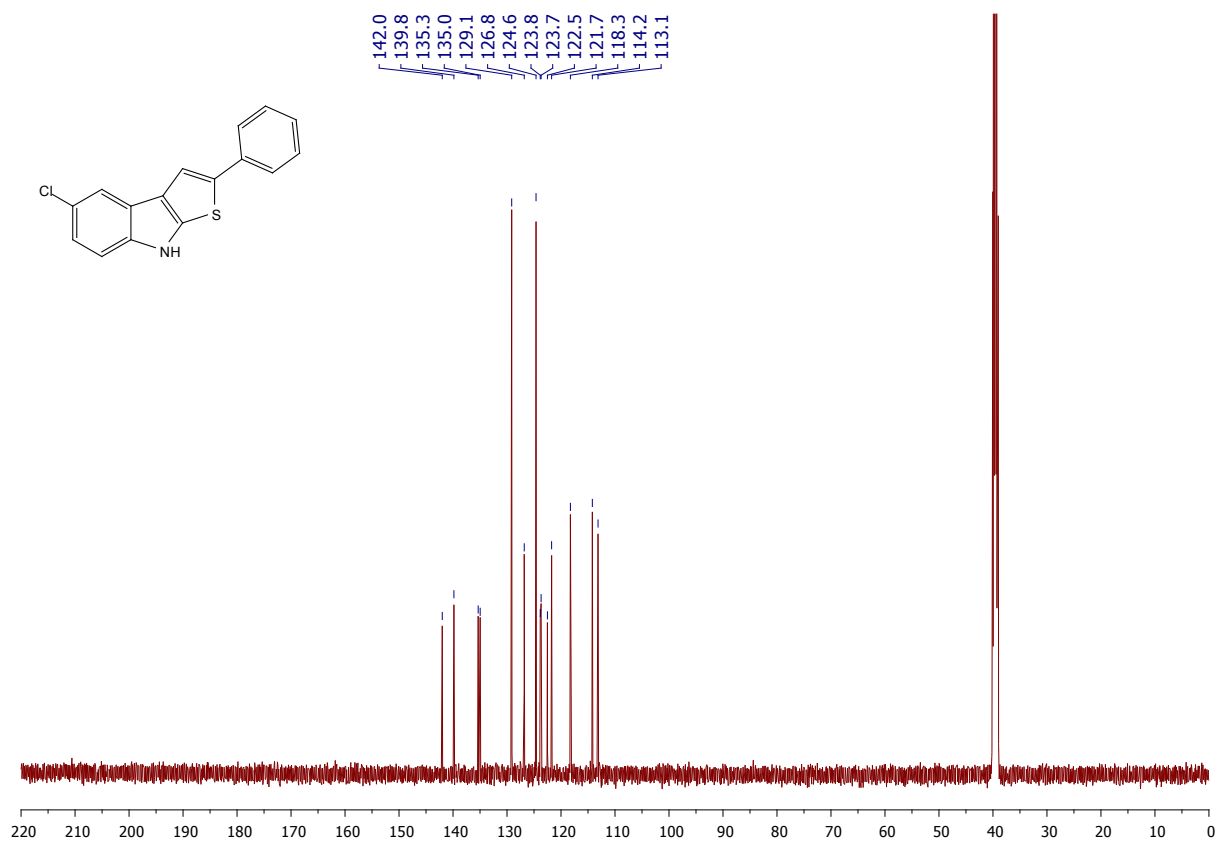

Figure S24. <sup>1</sup>H (top) and <sup>13</sup>C (bottom) NMR spectra of 5-chloro-2-phenyl-8H-thieno[2,3-b]indole 3q



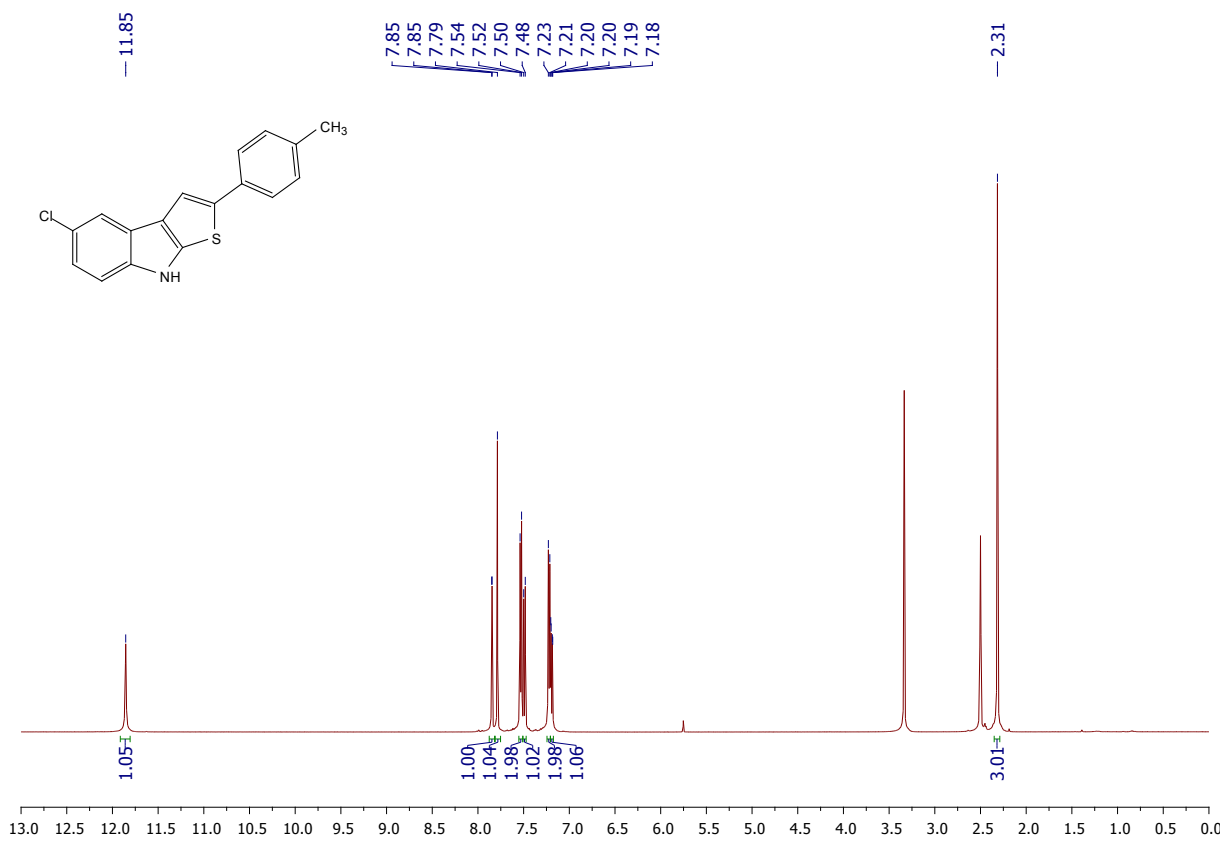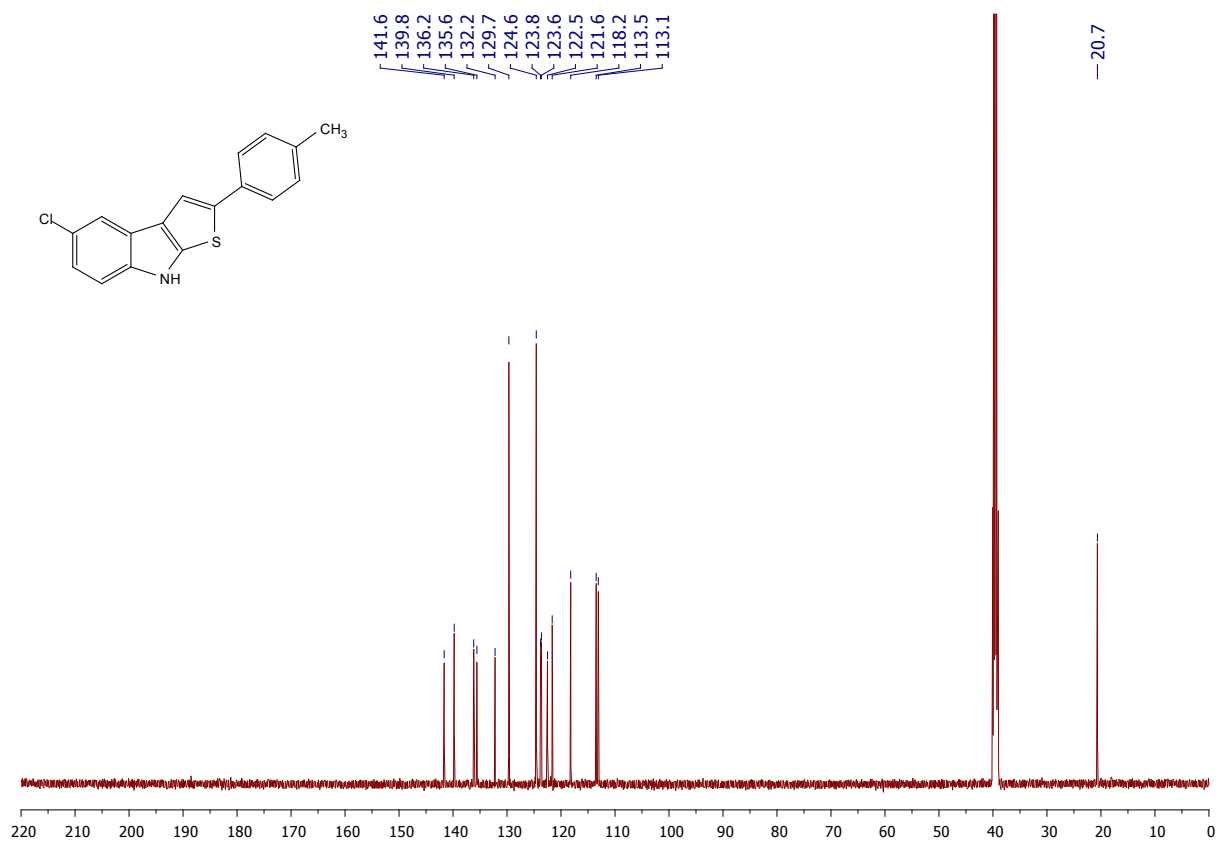

Figure S25. <sup>1</sup>H (top) and <sup>13</sup>C (bottom) NMR spectra of 5-chloro-2-(*p*-tolyl)-8*H*-thieno[2,3-*b*]indole 3r

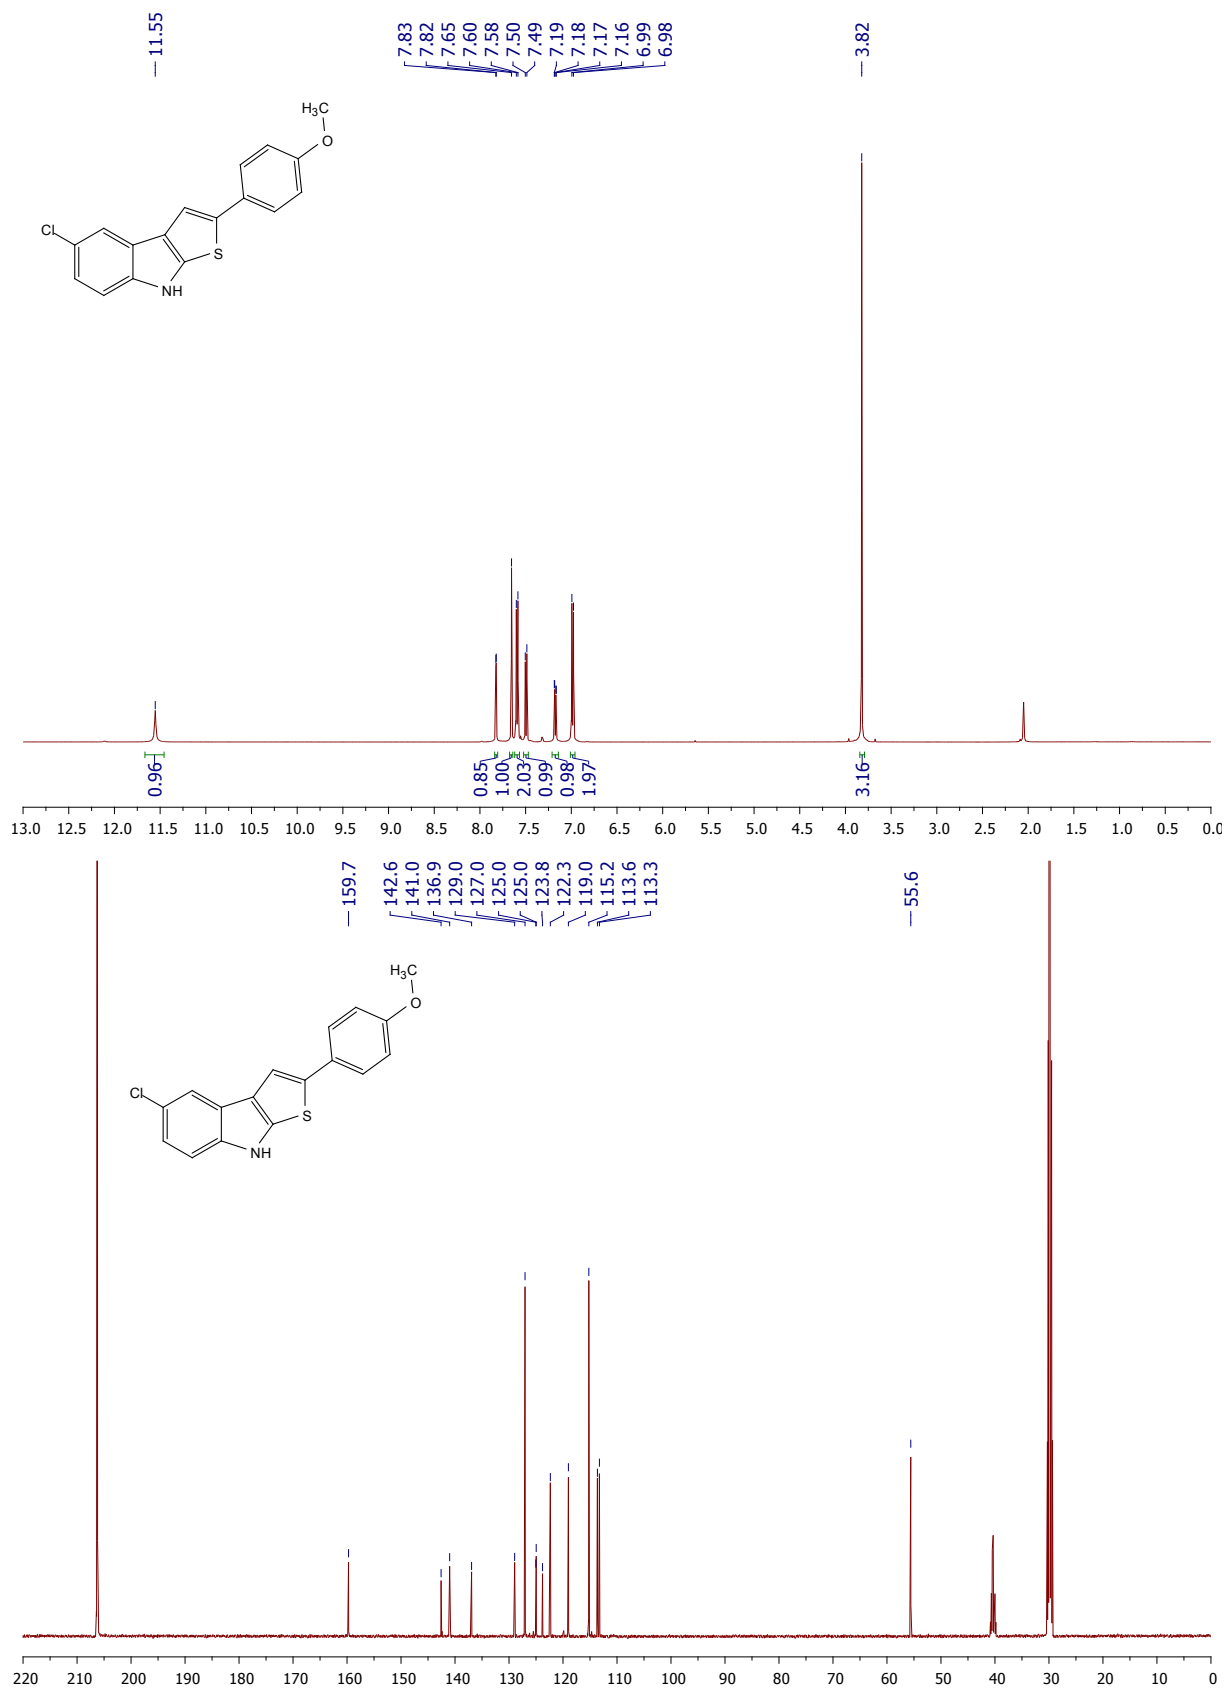

**Figure S26. <sup>1</sup>H (top) and <sup>13</sup>C (bottom) NMR spectra of 5-chloro-2-(4-methoxyphenyl)-8H-thieno[2,3-b]indole 3s**

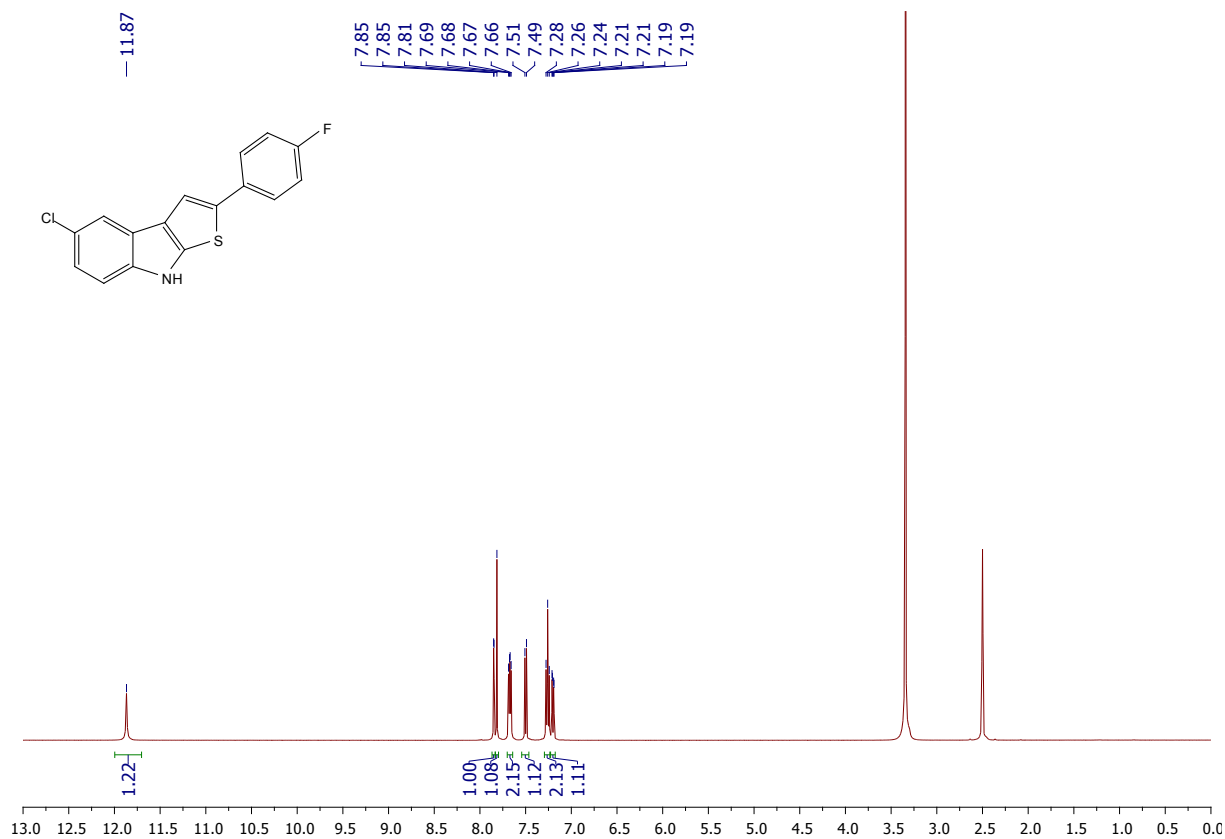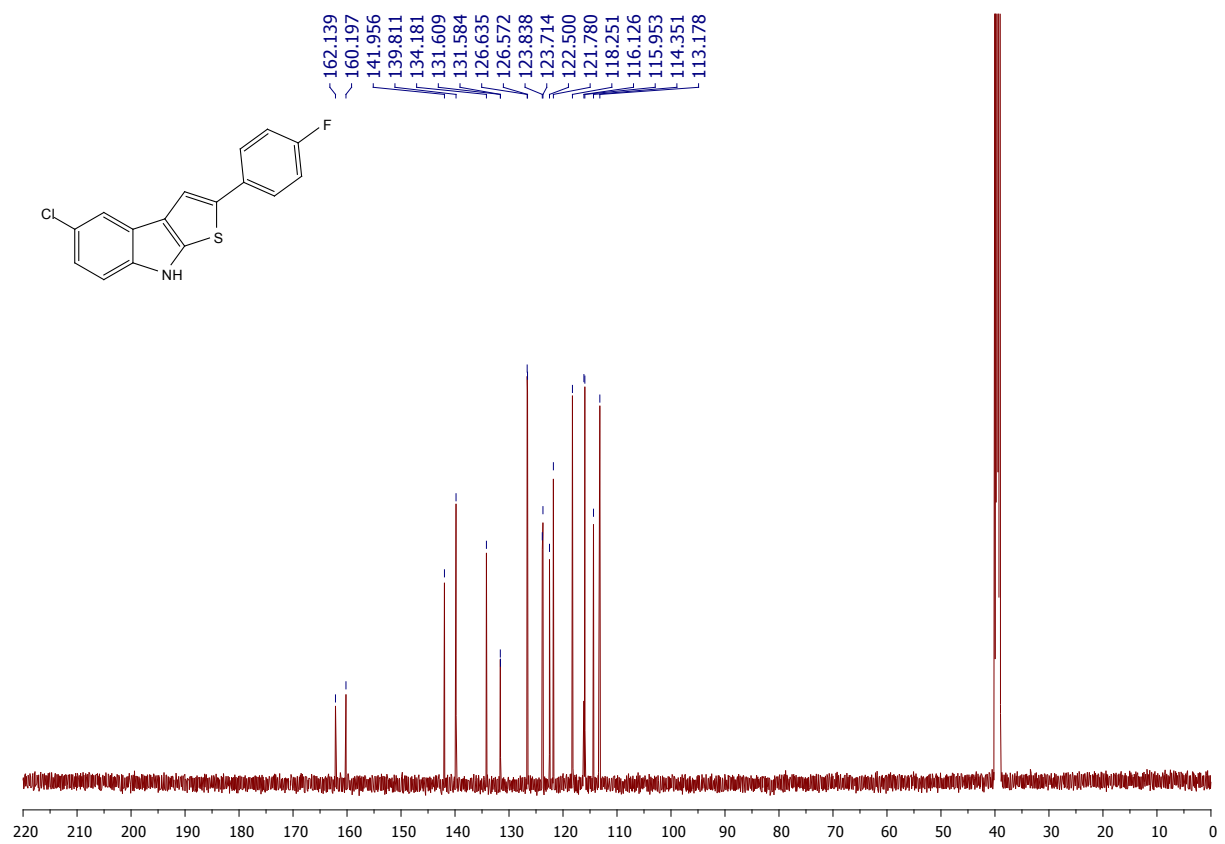

**Figure S27. <sup>1</sup>H (top) and <sup>13</sup>C (bottom) NMR spectra of 5-chloro-2-(4-fluorophenyl)-8H-thieno[2,3-*b*]indole 3t**

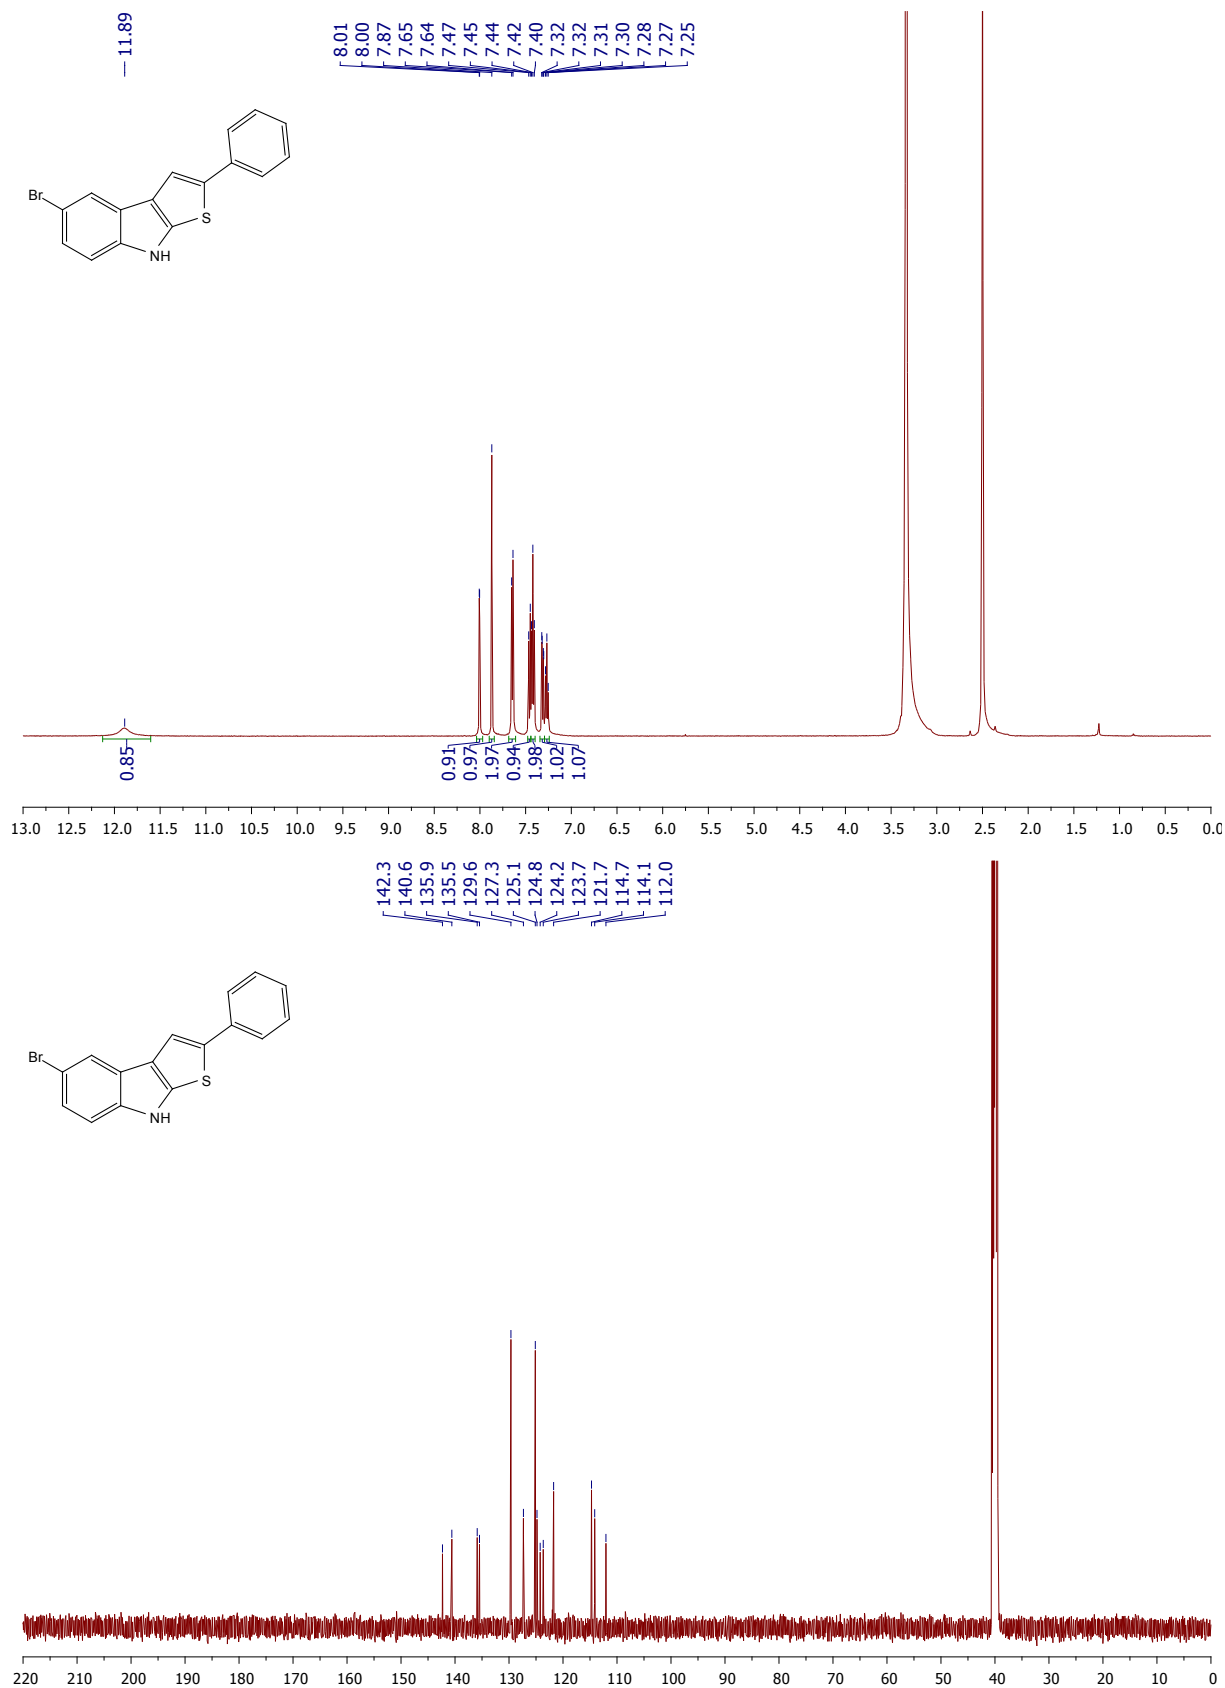

**Figure S28.** <sup>1</sup>H (top) and <sup>13</sup>C (bottom) NMR spectra of 5-bromo-2-phenyl-8*H*-thieno[2,3-*b*]indole 3u

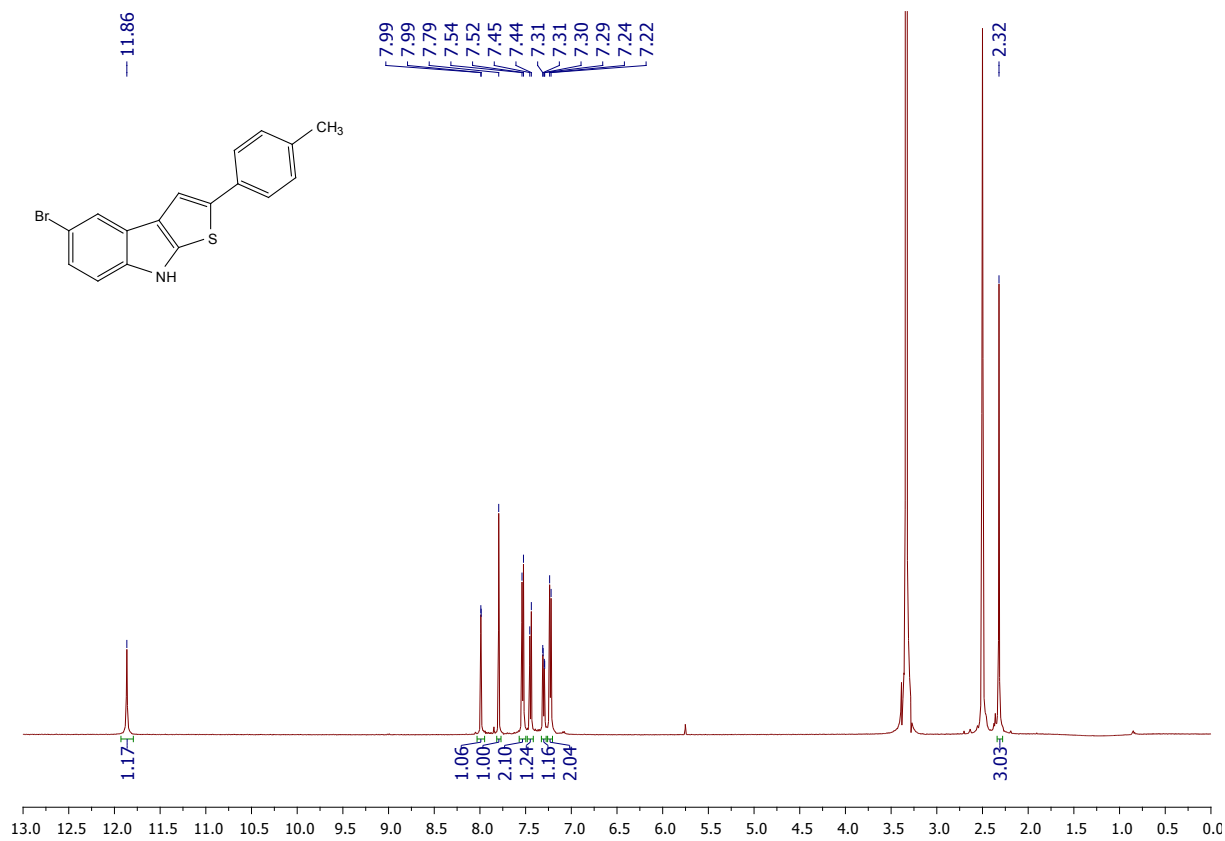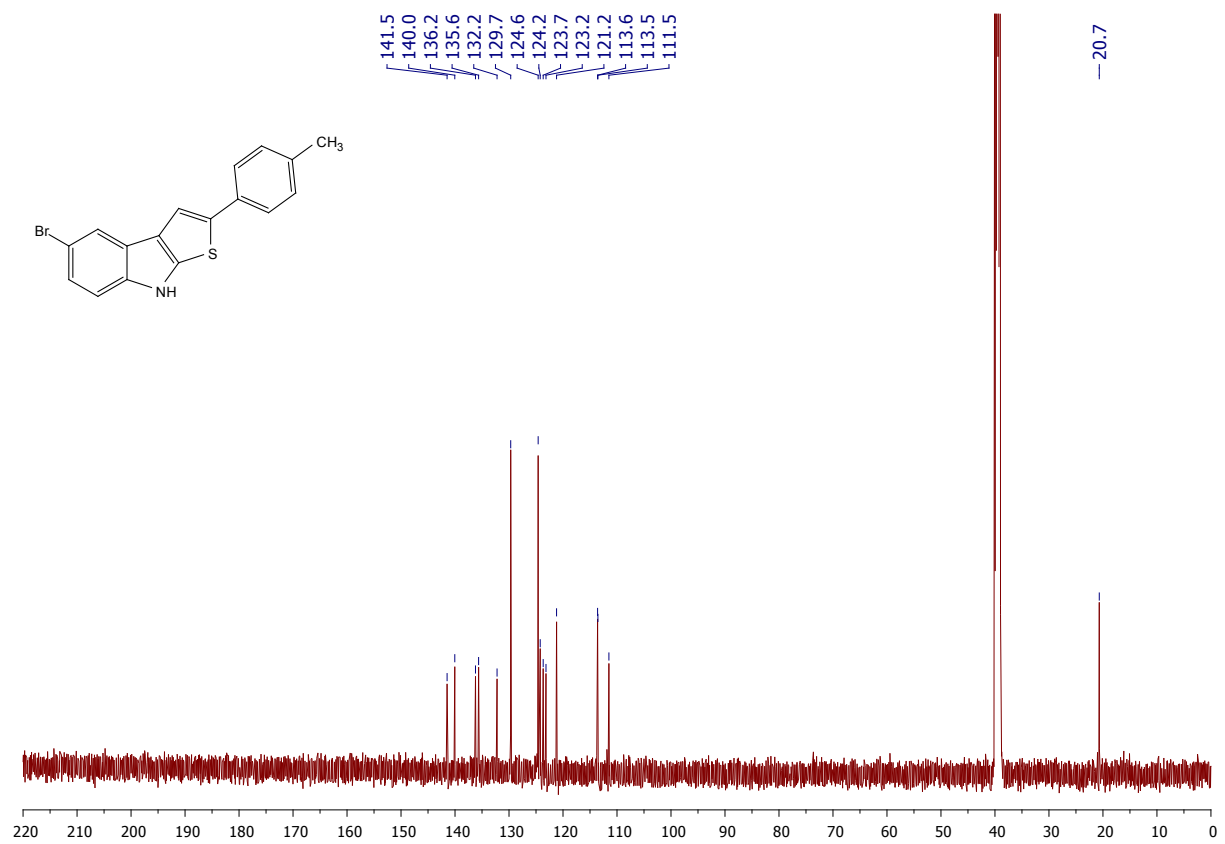

Figure S29.  $^1\text{H}$  (top) and  $^{13}\text{C}$  (bottom) NMR spectra of 5-bromo-2-(*p*-tolyl)-8*H*-thieno[2,3-*b*]indole 3v

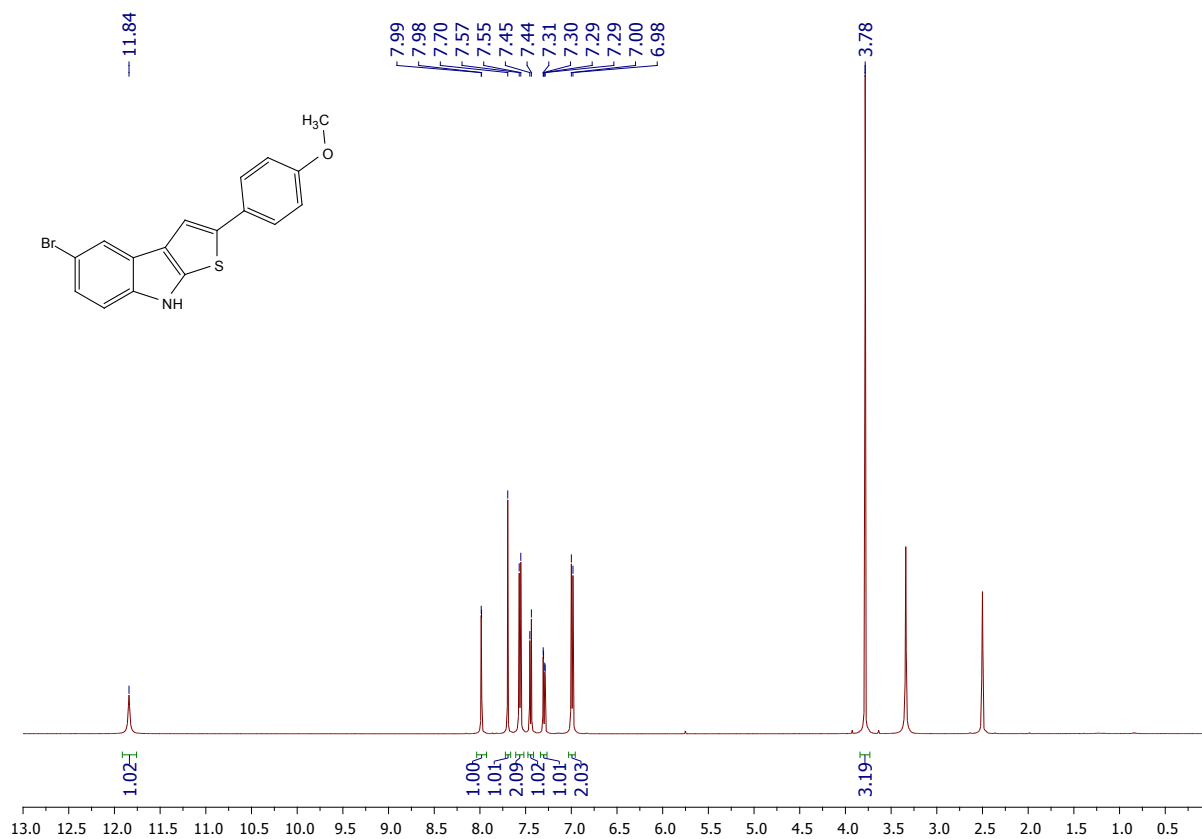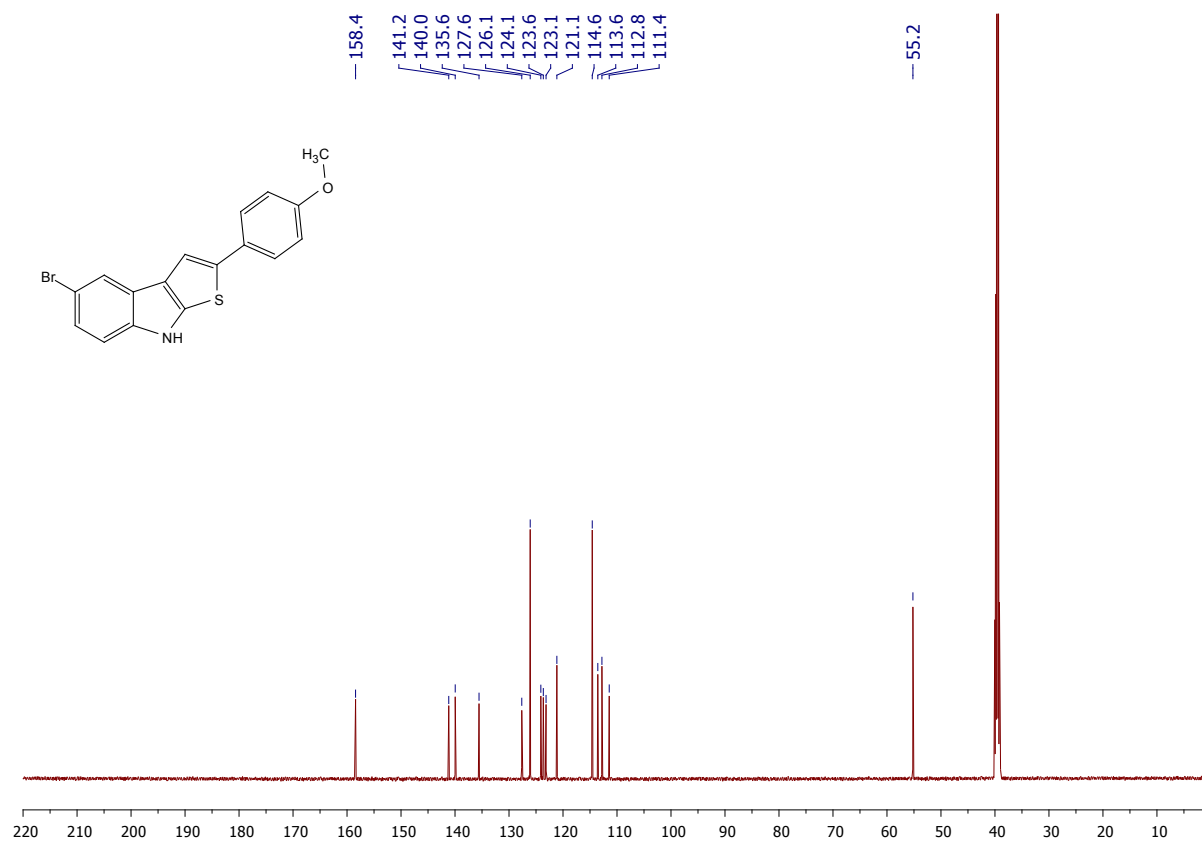

**Figure S30. <sup>1</sup>H (top) and <sup>13</sup>C (bottom) NMR spectra of 5-bromo-2-(4-methoxyphenyl)-8H-thieno[2,3-b]indole 3w**

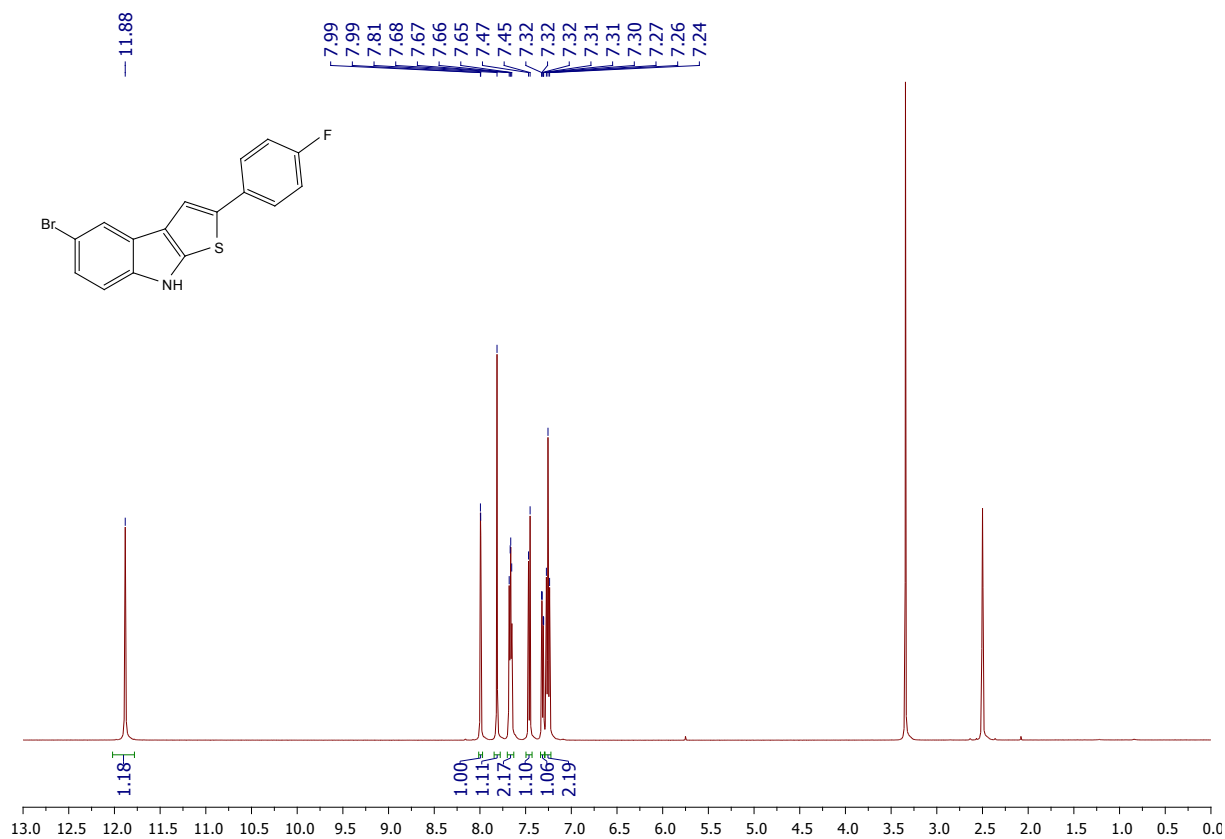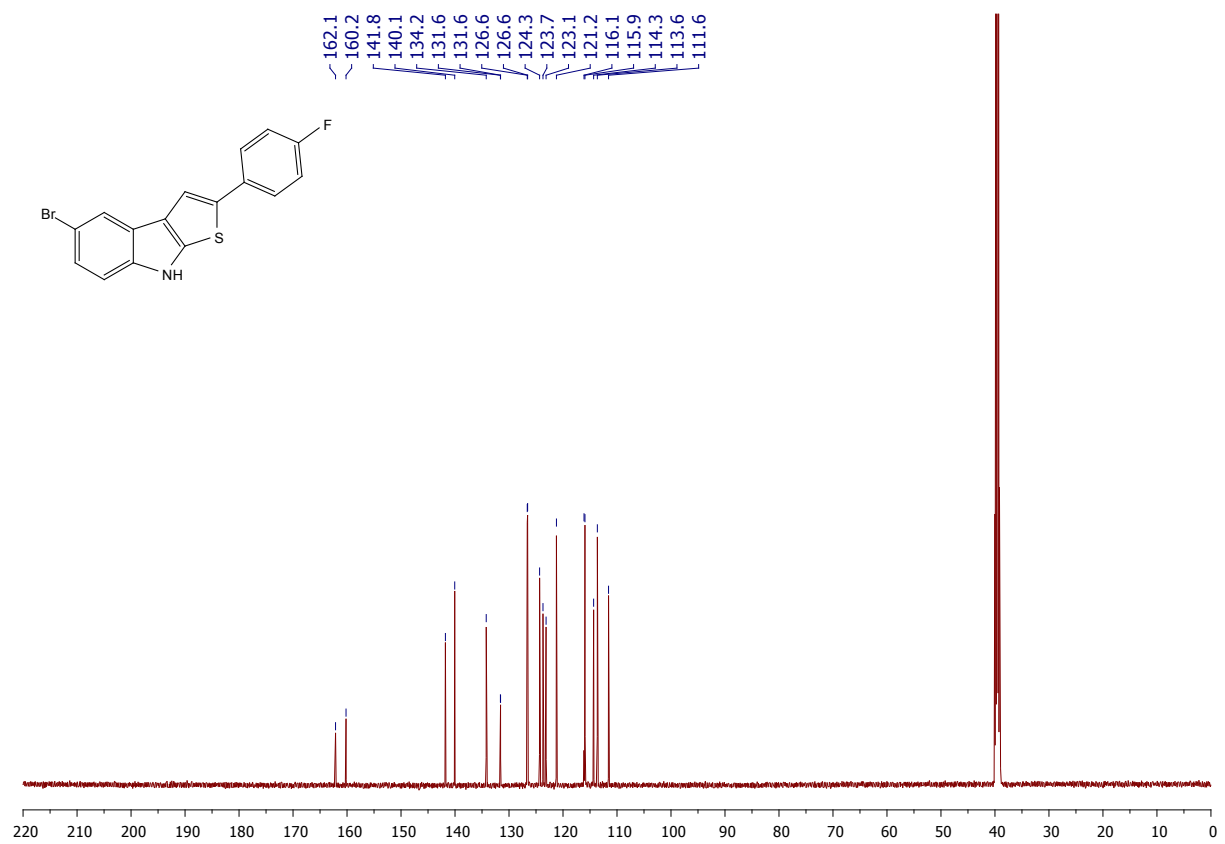

**Figure S31. <sup>1</sup>H (top) and <sup>13</sup>C (bottom) NMR spectra of 5-bromo-2-(4-fluorophenyl)-8H-thieno[2,3-b]indole 3x**

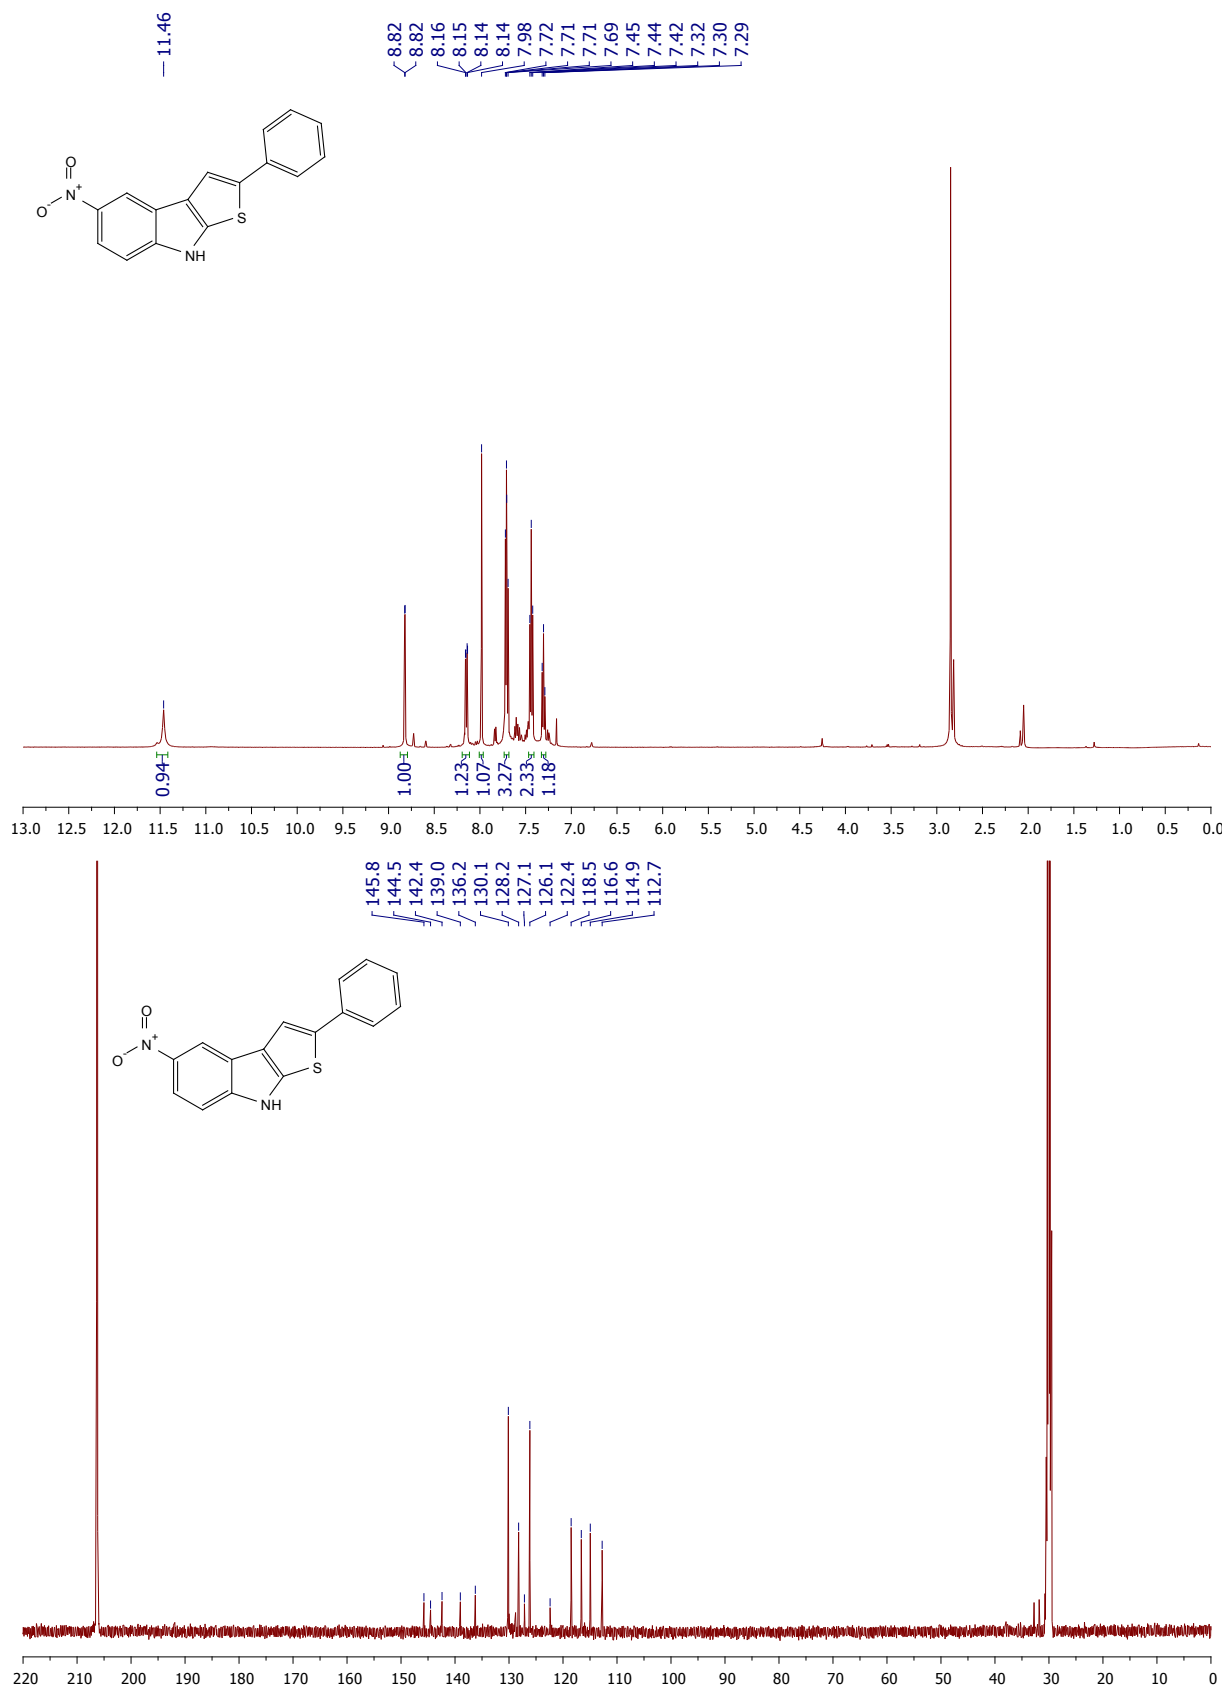

Figure S32. <sup>1</sup>H (top) and <sup>13</sup>C (bottom) NMR spectra of 5-nitro-2-phenyl-8H-thieno[2,3-b]indole 3y



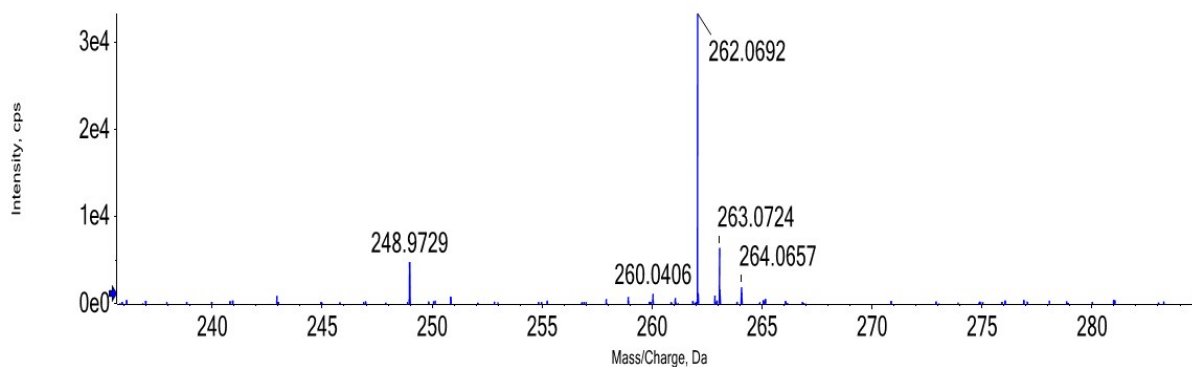

Figure S33. HRMS spectra of 2-(*p*-tolyl)-8*H*-thieno[2,3-*b*]indole

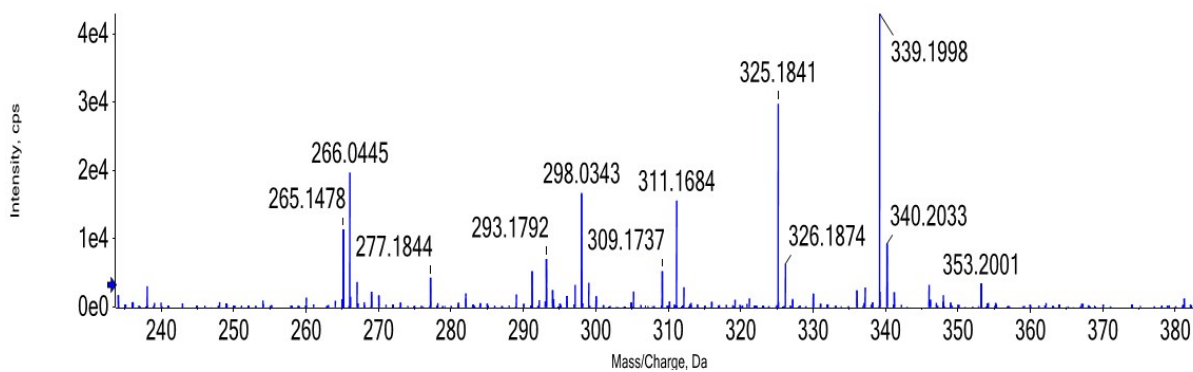

Figure S34. HRMS spectra of 2-(4-fluorophenyl)-8*H*-thieno[2,3-*b*]indole

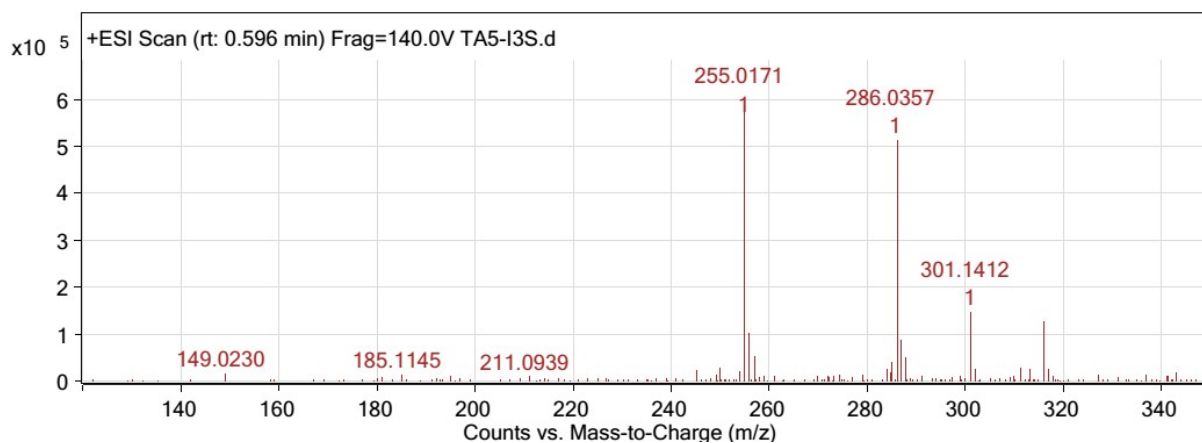

Figure S35. HRMS spectra of 2-(thiophen-2-yl)-8*H*-thieno[2,3-*b*]indole

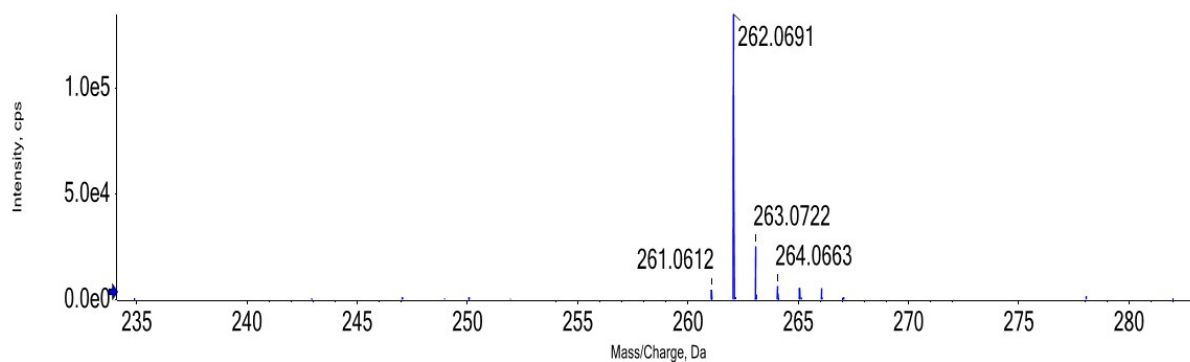

**Figure S36. HRMS spectra of 5-methyl-2-phenyl-8H-thieno[2,3-b]indole**

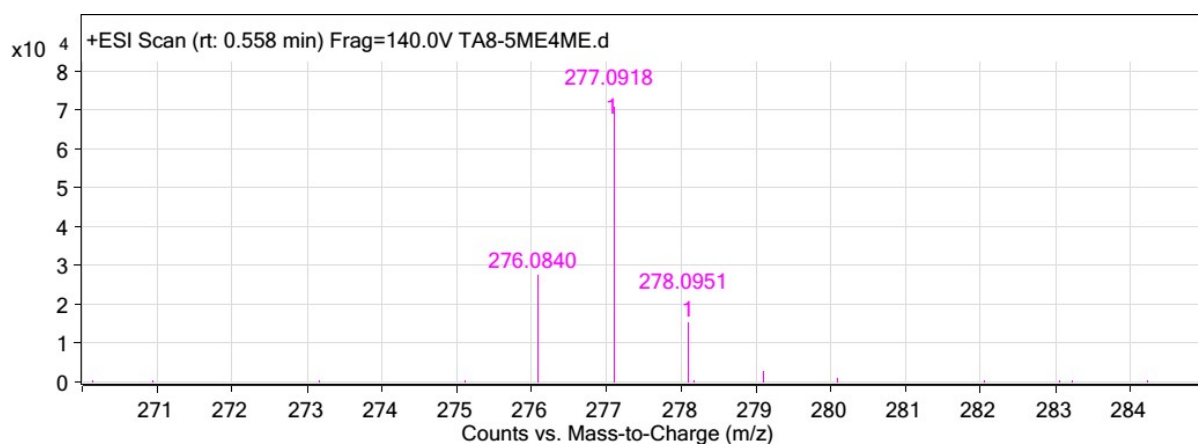

**Figure S37. HRMS spectra of 5-methyl-2-(*p*-tolyl)-8H-thieno[2,3-b]indole**

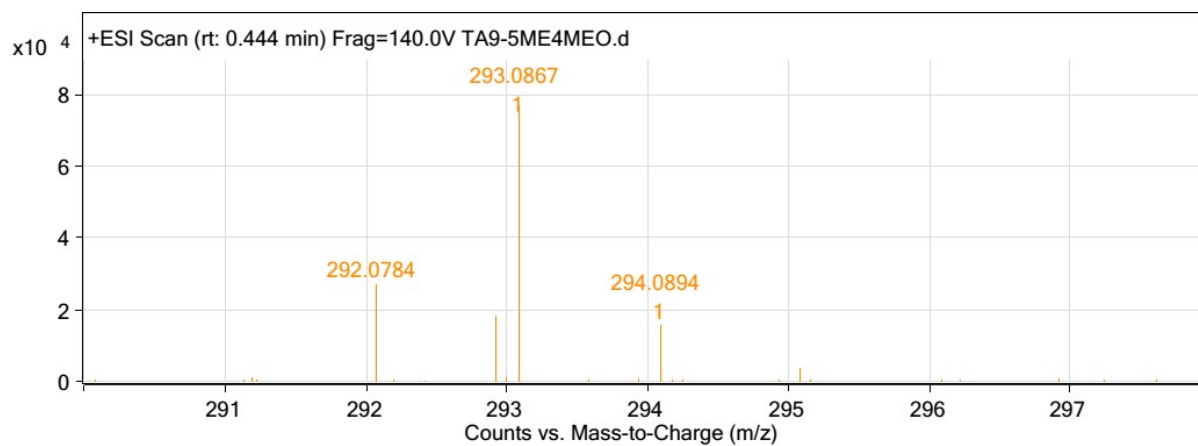

**Figure S38. HRMS spectra of 2-(4-methoxyphenyl)-5-methyl-8H-thieno[2,3-b]indole**

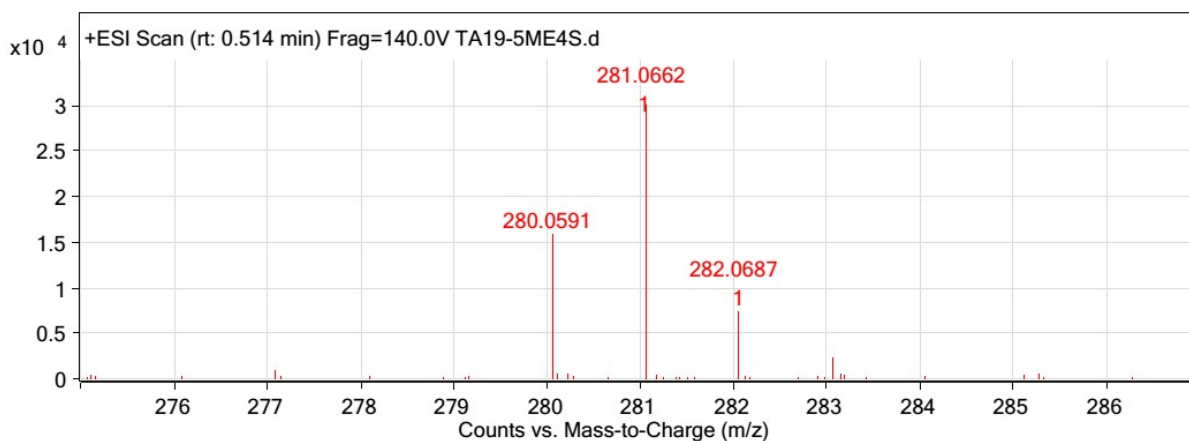

**Figure S39. HRMS spectra of 2-(4-fluorophenyl)-5-methyl-8H-thieno[2,3-b]indole**

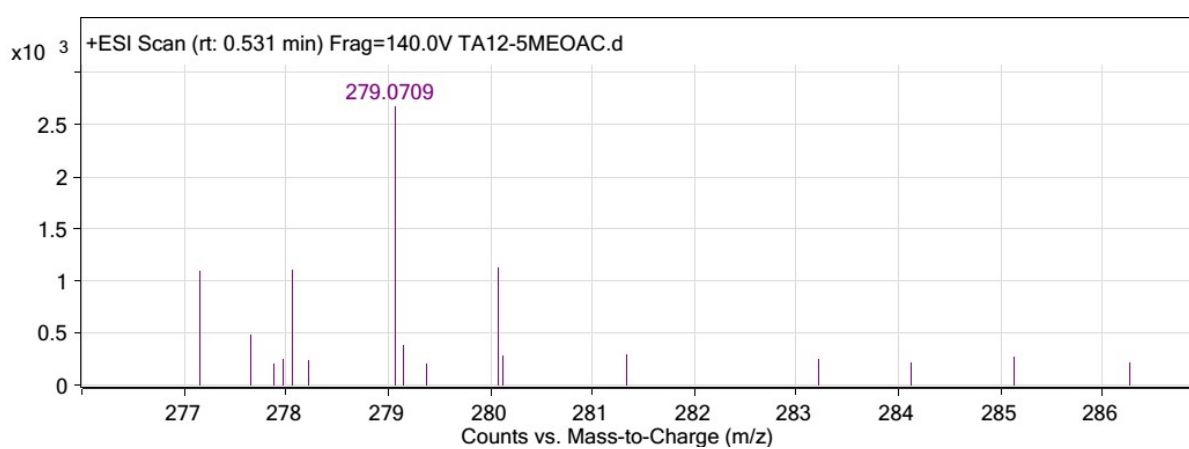

**Figure S40. HRMS spectra of 5-methoxy-2-phenyl-8H-thieno[2,3-b]indole**

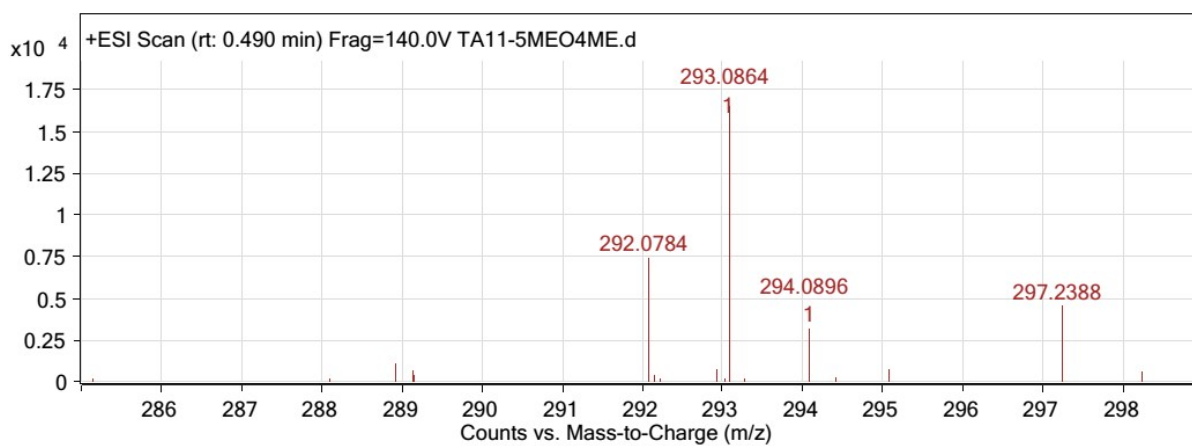

**Figure S41. HRMS spectra of 5-methoxy-2-(p-tolyl)-8H-thieno[2,3-b]indole**

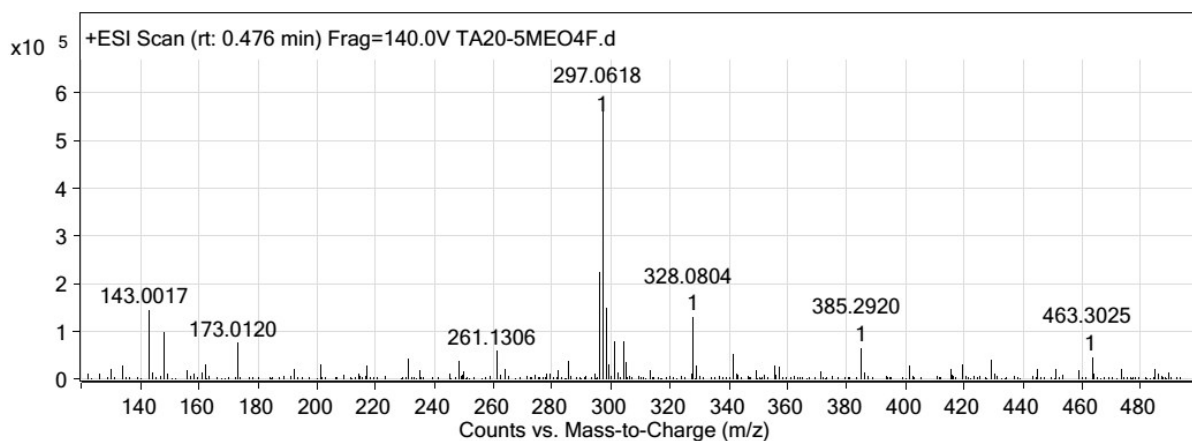

Figure S42. HRMS spectra of 5-methoxy-2-(4-fluorophenyl)-8*H*-thieno[2,3-*b*]indole

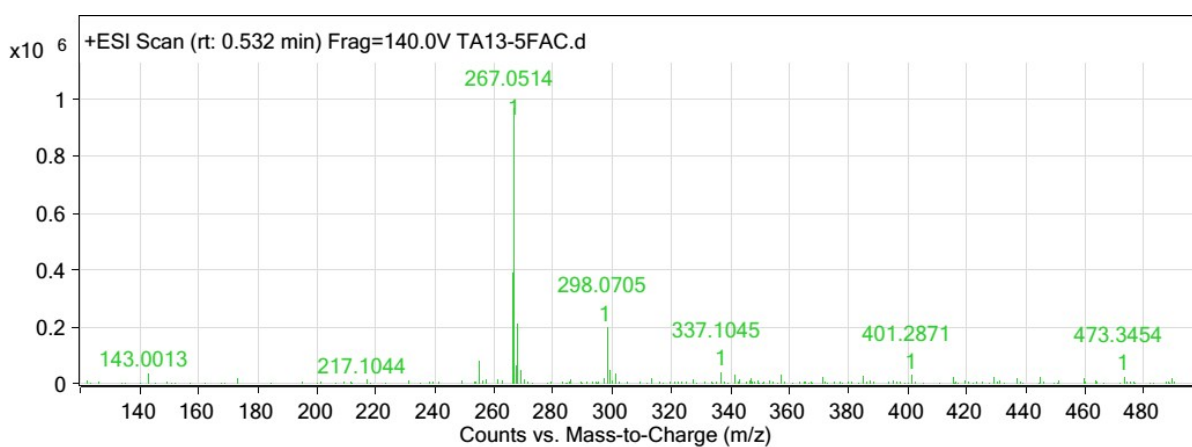

Figure S43. HRMS spectra of 5-fluoro-2-phenyl-8*H*-thieno[2,3-*b*]indole

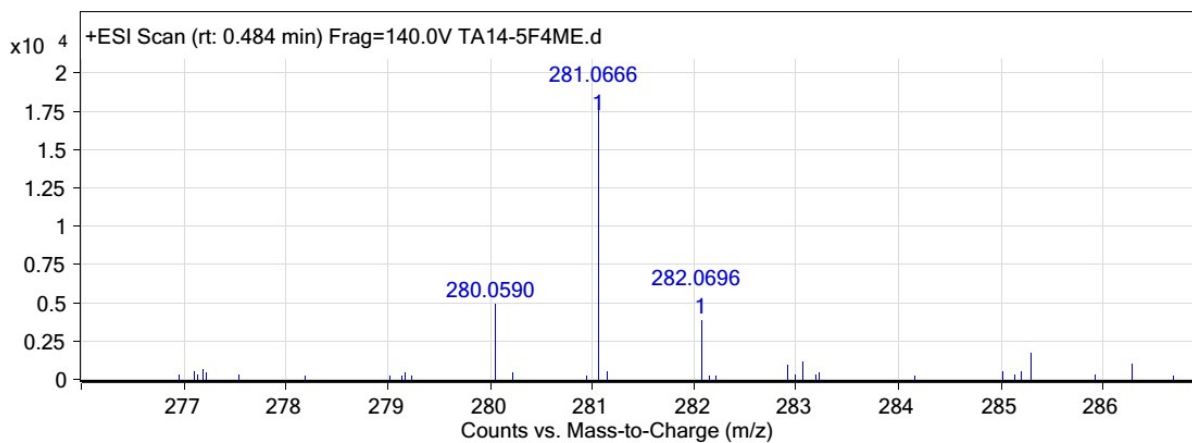

Figure S44. HRMS spectra of 5-fluoro-2-(*p*-tolyl)-8*H*-thieno[2,3-*b*]indole

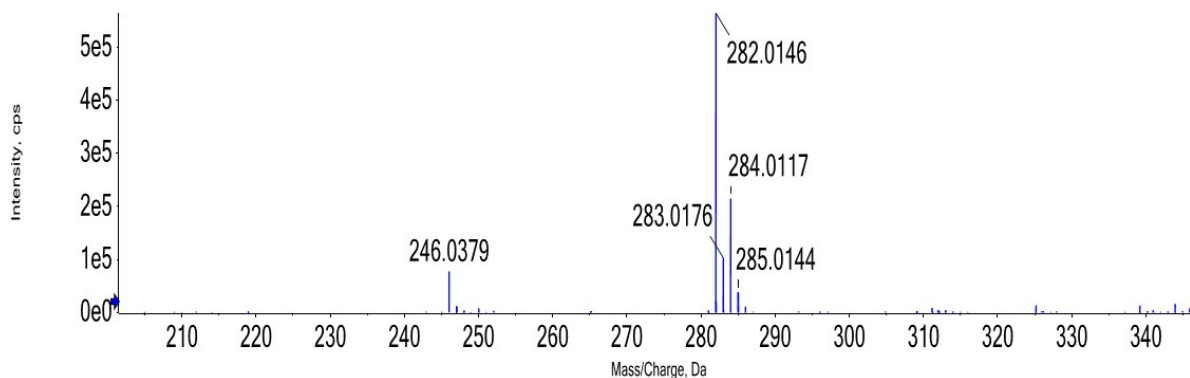

**Figure S45. HRMS spectra of 5-chloro-2-phenyl-8H-thieno[2,3-b]indole**

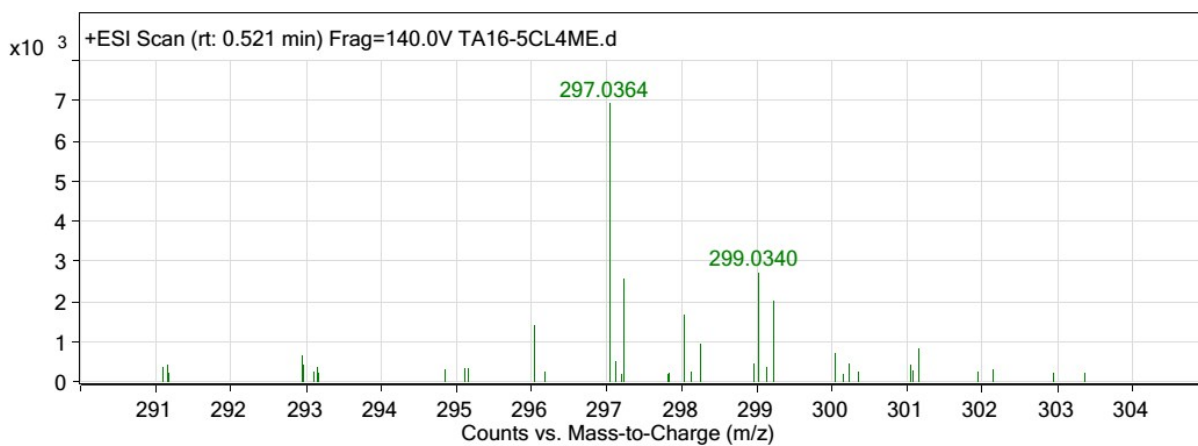

**Figure S46. HRMS spectra of 5-chloro-2-(p-tolyl)-8H-thieno[2,3-b]indole**

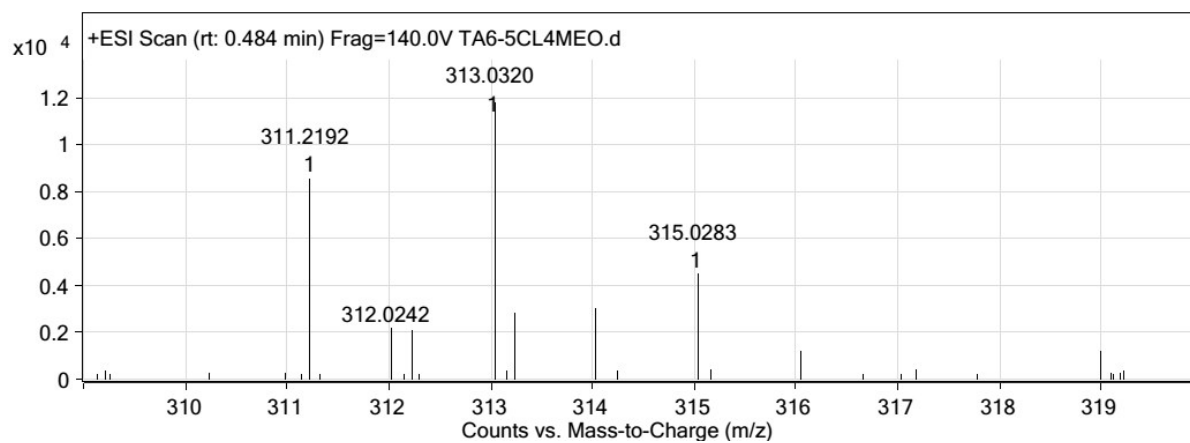

**Figure S47. HRMS spectra of 5-chloro-2-(4-methoxyphenyl)-8H-thieno[2,3-b]indole**

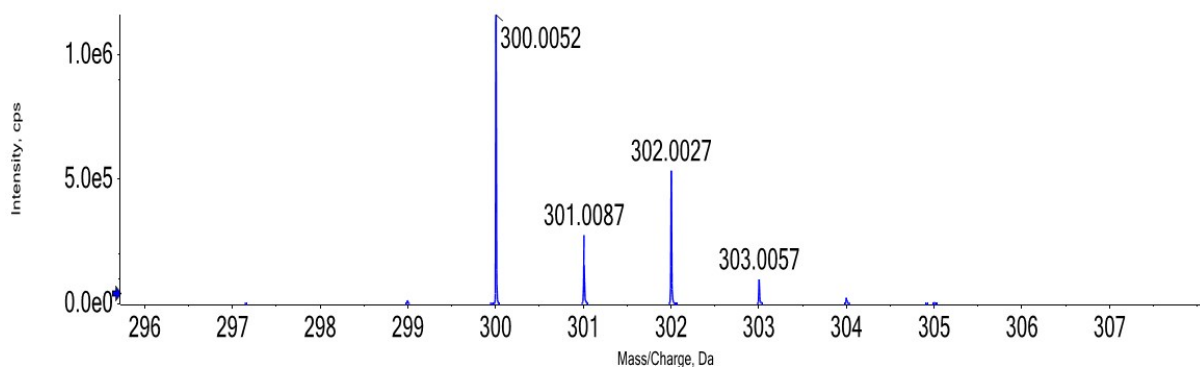

**Figure S48. HRMS spectra of 5-chloro-2-(4-fluorophenyl)-8H-thieno[2,3-b]indole**

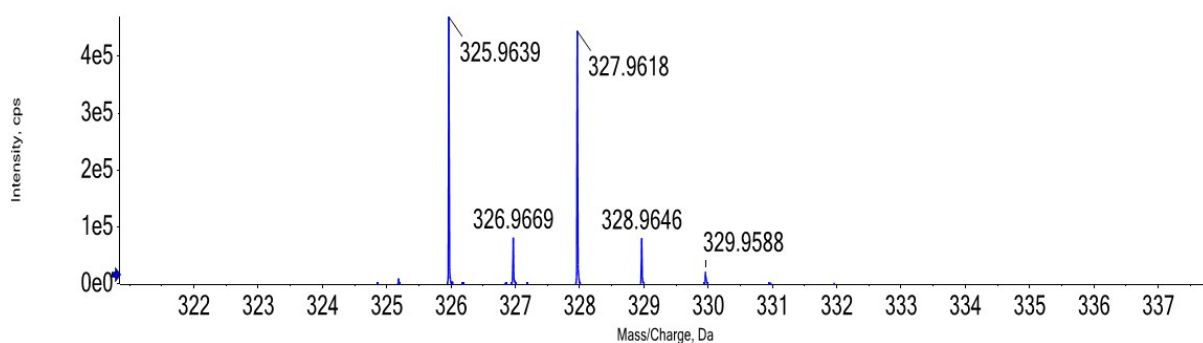

**Figure S49. HRMS spectra of 5-bromo-2-phenyl-8H-thieno[2,3-b]indole**

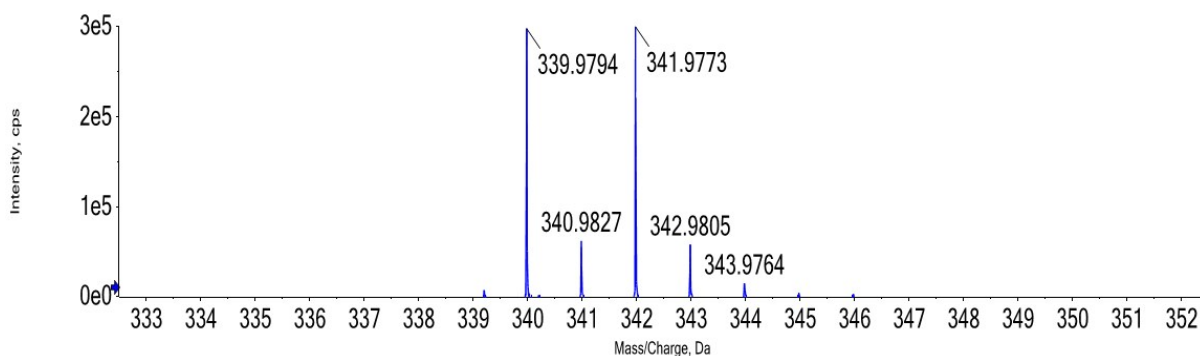

**Figure S50. HRMS spectra of 5-bromo-2-(p-tolyl)-8H-thieno[2,3-b]indole**

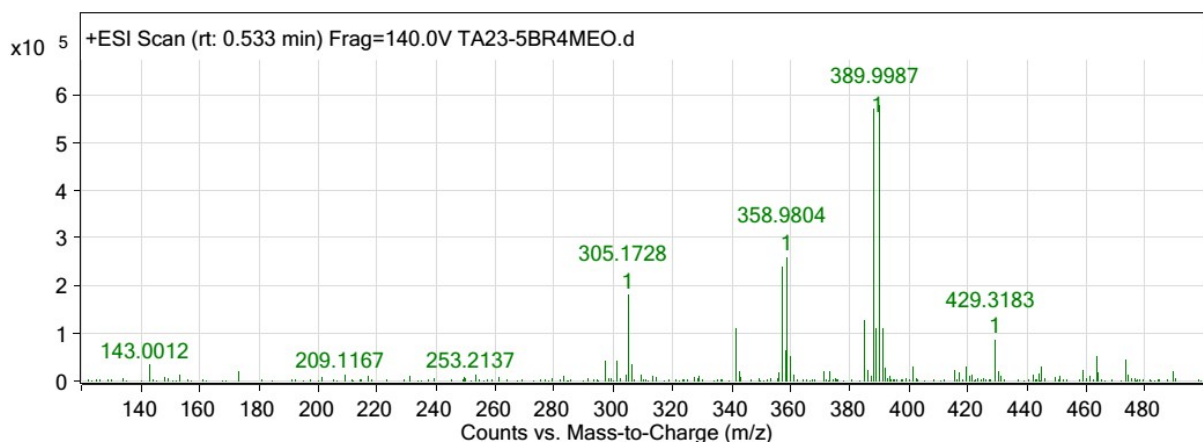

**Figure S51. HRMS spectra of 5-bromo-2-(4-methoxyphenyl)-8H-thieno[2,3-b]indole**

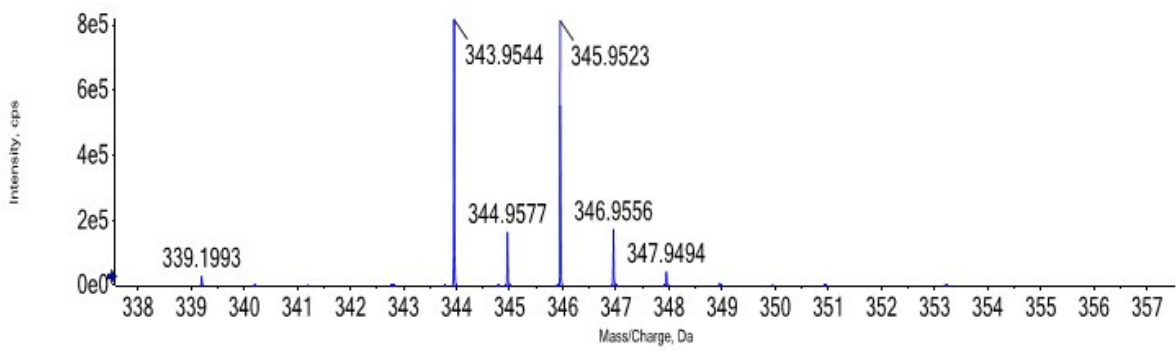

**Figure S52. HRMS spectra of 5-bromo-2-(4-fluorophenyl)-8H-thieno[2,3-b]indole**

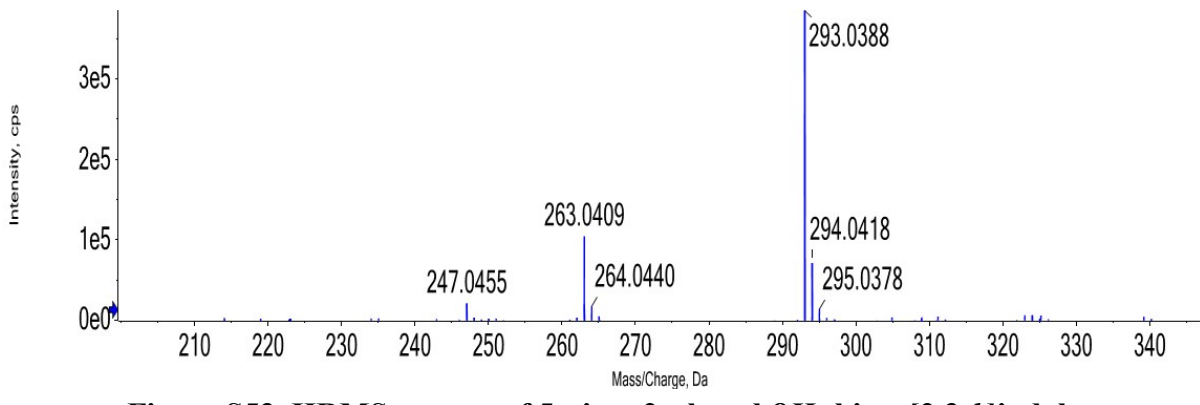

**Figure S53. HRMS spectra of 5-nitro-2-phenyl-8H-thieno[2,3-b]indole**
